# Supplementary material for: A novel HCC prognosis predictor PDSS1 affects the cell cycle through the STAT3 signaling pathway in HCC
Source: Front Oncol. 2022 Jul 28;12:927468. doi: 10.3389/fonc.2022.927468 (PMC9368321; doi:10.3389/fonc.2022.927468)
Supplement: Supplementary file 3 [file Table_3.xlsx]

## Sheet: Sheet 1
ONTOLOGY	ID	Description	GeneRatio	BgRatio	pvalue	p.adjust	qvalue	geneID	Count	zscore
BP	GO:0007059	chromosome segregation	73/494	321/18670	3.13384e-47	1.17049e-43	9.95242e-44	RAN/CCNB1/TRIP13/TTK/PLK1/DSCC1/AURKB/CDC6/HJURP/SKA1/NCAPG/KIF2C/NUF2/BUB1B/CENPF/CDCA8/NDC80/TUBG1/SPAG5/MAD2L1/CDC20/SPC25/KIF18B/SKA3/BUB1/NEK2/CENPE/KIF18A/DLGAP5/CENPW/OIP5/KIF4A/PRC1/ECT2/KIF23/ZWINT/TACC3/NCAPH/CDT1/CDCA2/NUSAP1/PTTG1/CDCA5/SFPQ/KIFC1/CCNE2/TOP2A/DYNC1LI1/CCNE1/KIF14/MKI67/NUP37/FANCD2/PTTG3P/FBXO5/RAD21/CENPK/MSTO1/NUP43/RCC2/RACGAP1/ZNF207/XRCC3/FEN1/NCAPD2/BIRC5/INCENP…	73	8.30992
BP	GO:0048285	organelle fission	83/494	449/18670	2.89866e-46	5.41325e-43	4.60277e-43	RAN/CCNB1/TRIP13/MYBL2/TTK/PLK1/DSCC1/UBE2C/AURKB/CDC6/NCAPG/KIF2C/NUF2/BUB1B/CENPF/CDCA8/NDC80/TUBG1/TPX2/SPAG5/MAD2L1/CDC20/KIF18B/BUB1/NEK2/CENPE/AURKA/KIF18A/DLGAP5/CKS2/KIF4A/PRC1/MTBP/KIF23/ZWINT/TACC3/NCAPH/CDT1/CDC25C/NUSAP1/UBE2S/PTTG1/CDCA5/KIFC1/CCNE2/TOP2A/ANLN/RAD54B/ASPM/DYNC1LI1/CCNE1/KIF11/KIF14/MKI67/RAD51/FANCD2/PTTG3P/FBXO5/CDC25B/RAD21/CENPK/MSTO1/PKMYT1/DNM1L/MASTL/RACGAP1/ZN…	83	8.67138
BP	GO:0000280	nuclear division	79/494	407/18670	1.18561e-45	1.47609e-42	1.25509e-42	RAN/CCNB1/TRIP13/MYBL2/TTK/PLK1/DSCC1/UBE2C/AURKB/CDC6/NCAPG/KIF2C/NUF2/BUB1B/CENPF/CDCA8/NDC80/TUBG1/TPX2/SPAG5/MAD2L1/CDC20/KIF18B/BUB1/NEK2/CENPE/AURKA/KIF18A/DLGAP5/CKS2/KIF4A/PRC1/MTBP/KIF23/ZWINT/TACC3/NCAPH/CDT1/CDC25C/NUSAP1/UBE2S/PTTG1/CDCA5/KIFC1/CCNE2/TOP2A/ANLN/RAD54B/ASPM/DYNC1LI1/CCNE1/KIF11/KIF14/MKI67/RAD51/FANCD2/PTTG3P/FBXO5/CDC25B/RAD21/CENPK/MSTO1/PKMYT1/MASTL/RACGAP1/ZNF207/X…	79	8.66318
BP	GO:0140014	mitotic nuclear division	65/494	264/18670	2.26624e-44	2.1161e-41	1.79928e-41	RAN/CCNB1/TRIP13/MYBL2/TTK/PLK1/DSCC1/UBE2C/AURKB/CDC6/NCAPG/KIF2C/NUF2/BUB1B/CENPF/CDCA8/NDC80/TUBG1/TPX2/SPAG5/MAD2L1/CDC20/KIF18B/BUB1/NEK2/CENPE/AURKA/KIF18A/DLGAP5/KIF4A/PRC1/MTBP/KIF23/ZWINT/TACC3/NCAPH/CDT1/CDC25C/NUSAP1/UBE2S/PTTG1/CDCA5/KIFC1/ANLN/DYNC1LI1/KIF11/KIF14/MKI67/PTTG3P/FBXO5/RAD21/CENPK/MSTO1/PKMYT1/RACGAP1/ZNF207/XRCC3/KNTC1/NCAPD2/BIRC5/INCENP/HNRNPU/SMC4/KIF20B/CDC14B	65	7.81419
BP	GO:0000070	mitotic sister chromatid segregation	50/494	151/18670	3.02974e-41	2.26322e-38	1.92436e-38	RAN/CCNB1/TRIP13/TTK/PLK1/DSCC1/AURKB/CDC6/NCAPG/KIF2C/NUF2/BUB1B/CENPF/CDCA8/NDC80/TUBG1/SPAG5/MAD2L1/CDC20/KIF18B/BUB1/NEK2/CENPE/KIF18A/DLGAP5/KIF4A/PRC1/KIF23/ZWINT/TACC3/NCAPH/CDT1/NUSAP1/PTTG1/CDCA5/KIFC1/DYNC1LI1/KIF14/PTTG3P/FBXO5/RAD21/CENPK/MSTO1/RACGAP1/ZNF207/XRCC3/NCAPD2/INCENP/HNRNPU/SMC4	50	7.07107
BP	GO:0000819	sister chromatid segregation	54/494	189/18670	1.20203e-40	7.48265e-38	6.36233e-38	RAN/CCNB1/TRIP13/TTK/PLK1/DSCC1/AURKB/CDC6/NCAPG/KIF2C/NUF2/BUB1B/CENPF/CDCA8/NDC80/TUBG1/SPAG5/MAD2L1/CDC20/KIF18B/BUB1/NEK2/CENPE/KIF18A/DLGAP5/KIF4A/PRC1/KIF23/ZWINT/TACC3/NCAPH/CDT1/NUSAP1/PTTG1/CDCA5/SFPQ/KIFC1/TOP2A/DYNC1LI1/KIF14/PTTG3P/FBXO5/RAD21/CENPK/MSTO1/RACGAP1/ZNF207/XRCC3/FEN1/NCAPD2/INCENP/HNRNPU/SMC4/ESCO2	54	7.34847
BP	GO:0098813	nuclear chromosome segregation	60/494	262/18670	5.25691e-39	2.80494e-36	2.38498e-36	RAN/CCNB1/TRIP13/TTK/PLK1/DSCC1/AURKB/CDC6/NCAPG/KIF2C/NUF2/BUB1B/CENPF/CDCA8/NDC80/TUBG1/SPAG5/MAD2L1/CDC20/KIF18B/BUB1/NEK2/CENPE/KIF18A/DLGAP5/KIF4A/PRC1/ECT2/KIF23/ZWINT/TACC3/NCAPH/CDT1/NUSAP1/PTTG1/CDCA5/SFPQ/KIFC1/CCNE2/TOP2A/DYNC1LI1/CCNE1/KIF14/FANCD2/PTTG3P/FBXO5/RAD21/CENPK/MSTO1/RCC2/RACGAP1/ZNF207/XRCC3/FEN1/NCAPD2/INCENP/HNRNPU/SMC4/EME1/ESCO2	60	7.74597
BP	GO:0051983	regulation of chromosome segregation	34/494	103/18670	2.75638e-28	1.28689e-25	1.09421e-25	CCNB1/TRIP13/TTK/PLK1/AURKB/CDC6/KIF2C/BUB1B/CENPF/NDC80/SPAG5/MAD2L1/CDC20/BUB1/NEK2/CENPE/DLGAP5/ECT2/TACC3/CDT1/PTTG1/CDCA5/SFPQ/DYNC1LI1/MKI67/PTTG3P/FBXO5/RAD21/RCC2/RACGAP1/ZNF207/XRCC3/FEN1/HNRNPU	34	5.83095
BP	GO:1901990	regulation of mitotic cell cycle phase transition	63/494	444/18670	3.1902e-28	1.32393e-25	1.12571e-25	CCNB1/TRIP13/TTK/PLK1/GTSE1/UBE2C/AURKB/CDC6/CDK1/BUB1B/EZH2/CENPF/CEP72/NDC80/TUBG1/TPX2/MAD2L1/CDC20/BUB1/NEK2/CENPE/ANAPC7/AURKA/BLM/CDC25A/DLGAP5/MTBP/CDT1/CDC25C/CDCA5/ANLN/DYNC1LI1/CCNE1/CDC45/KIF14/FBXO5/CDC25B/RAD21/DONSON/CDC7/RCC2/PSMD14/DTL/PRMT1/HMMR/ZNF207/DYNLL1/XRCC3/E2F8/KNTC1/E2F1/HAUS5/PLK4/CNOT6/CDK4/CEP78/HAUS1/ARID3A/PRKDC/CYP1A1/FOXO4/FBXO31/CDC14B	63	6.92935
BP	GO:1901987	regulation of cell cycle phase transition	64/494	480/18670	4.21215e-27	1.57324e-24	1.33769e-24	CCNB1/TRIP13/TTK/PLK1/GTSE1/UBE2C/AURKB/CDC6/CDK1/BUB1B/EZH2/CENPF/CEP72/NDC80/TUBG1/TPX2/MAD2L1/CDC20/DBF4/BUB1/NEK2/CENPE/ANAPC7/AURKA/BLM/CDC25A/DLGAP5/MTBP/CDT1/CDC25C/CDCA5/ANLN/DYNC1LI1/CCNE1/CDC45/KIF14/FBXO5/CDC25B/RAD21/DONSON/CDC7/RCC2/PSMD14/DTL/PRMT1/HMMR/ZNF207/DYNLL1/XRCC3/E2F8/KNTC1/E2F1/HAUS5/PLK4/CNOT6/CDK4/CEP78/HAUS1/ARID3A/PRKDC/CYP1A1/FOXO4/FBXO31/CDC14B	64	7
BP	GO:0007088	regulation of mitotic nuclear division	38/494	164/18670	3.46493e-25	1.1765e-22	1.00035e-22	CCNB1/TRIP13/TTK/PLK1/UBE2C/AURKB/CDC6/BUB1B/CENPF/NDC80/MAD2L1/CDC20/BUB1/NEK2/CENPE/AURKA/DLGAP5/MTBP/TACC3/CDT1/CDC25C/NUSAP1/PTTG1/CDCA5/ANLN/DYNC1LI1/KIF11/MKI67/PTTG3P/FBXO5/RAD21/PKMYT1/ZNF207/XRCC3/KNTC1/HNRNPU/KIF20B/CDC14B	38	5.83997
BP	GO:0090068	positive regulation of cell cycle process	49/494	298/18670	5.31308e-25	1.6537e-22	1.4061e-22	CCNB1/GTSE1/UBE2C/AURKB/CDC6/CDK1/EZH2/NDC80/SPAG5/MAD2L1/DBF4/AURKA/CDC25A/DLGAP5/MTBP/ECT2/KIF23/CDT1/CDC25C/NUSAP1/CDCA5/SFPQ/DYNC1LI1/CCNE1/CDC45/KIF14/FBXO5/CDC25B/RAD21/CDC7/RCC2/DTL/PRMT1/RACGAP1/GPSM2/XRCC3/FEN1/E2F8/E2F1/MYBBP1A/PLK4/HNRNPU/CNOT6/KIF20B/CDK4/ARID3A/CYP1A1/FOXO4/CDC14B	49	6.14286
BP	GO:0007051	spindle organization	38/494	170/18670	1.40307e-24	4.03113e-22	3.42758e-22	RAN/CCNB1/MYBL2/WDR62/TTK/PLK1/AURKB/NUF2/CEP72/NDC80/TUBG1/TPX2/SPAG5/CDC20/SPC25/NEK2/CENPE/AURKA/CENPW/KIF4A/PRC1/KIF23/TACC3/KIFC1/ASPM/KIF11/FBXO5/MSTO1/STIL/RACGAP1/ZNF207/GPSM2/HAUS5/BIRC5/HNRNPU/RAE1/HAUS1/SUN2	38	5.83997
BP	GO:1902850	microtubule cytoskeleton organization involved in mitosis	34/494	131/18670	2.12232e-24	5.66205e-22	4.81432e-22	RAN/CCNB1/MYBL2/WDR62/CENPA/TTK/PLK1/AURKB/NUF2/NDC80/TUBG1/TPX2/MAD2L1/CDC20/SPC25/NEK2/CENPE/AURKA/KIF4A/PRC1/KIF23/TACC3/NUSAP1/KIFC1/KIF11/MSTO1/STIL/RACGAP1/ZNF207/GPSM2/BIRC5/HNRNPU/RAE1/SUN2	34	5.48795
BP	GO:0007052	mitotic spindle organization	31/494	106/18670	4.45506e-24	1.10931e-21	9.43223e-22	RAN/CCNB1/MYBL2/WDR62/TTK/PLK1/AURKB/NUF2/NDC80/TUBG1/TPX2/CDC20/SPC25/NEK2/CENPE/AURKA/KIF4A/PRC1/KIF23/TACC3/KIFC1/KIF11/MSTO1/STIL/RACGAP1/ZNF207/GPSM2/BIRC5/HNRNPU/RAE1/SUN2	31	5.20855
BP	GO:0033044	regulation of chromosome organization	51/494	342/18670	5.71043e-24	1.33303e-21	1.13344e-21	CCT6A/CCT5/CCNB1/TRIP13/TTK/PLK1/AURKB/CDC6/BUB1B/CENPF/NDC80/MAD2L1/CDC20/PPHLN1/BUB1/NEK2/CENPE/CCT2/DLGAP5/UBE2N/MAPKAPK5/CCT3/TACC3/DNMT1/CDT1/PTTG1/CDCA5/SFPQ/GNL3/TOP2A/PIF1/HNRNPC/DYNC1LI1/CDC45/MKI67/PTTG3P/FBXO5/TRIM28/CCT8/TCP1/RAD21/MCM2/ZNF207/DKC1/XRCC3/FEN1/SMG5/ATAD2/SMARCB1/EED/HNRNPU	51	7.14143
BP	GO:0051783	regulation of nuclear division	39/494	188/18670	6.39025e-24	1.33904e-21	1.13856e-21	CCNB1/TRIP13/TTK/PLK1/UBE2C/AURKB/CDC6/BUB1B/CENPF/NDC80/MAD2L1/CDC20/BUB1/NEK2/CENPE/AURKA/DLGAP5/MTBP/TACC3/CDT1/CDC25C/NUSAP1/PTTG1/CDCA5/ANLN/DYNC1LI1/KIF11/MKI67/PTTG3P/FBXO5/RAD21/PKMYT1/ZNF207/XRCC3/KNTC1/FBXO43/HNRNPU/KIF20B/CDC14B	39	5.92474
BP	GO:0006260	DNA replication	46/494	274/18670	6.45321e-24	1.33904e-21	1.13856e-21	GTPBP4/MCM10/DSCC1/MCM4/GINS1/CDC6/CDK1/EXO1/RECQL4/RFC4/DBF4/KIN/BLM/POLD1/CHAF1B/CDT1/CCNE2/PIF1/POLQ/CCNE1/CDC45/RRM2/RAD51/FBXO5/DONSON/RFC2/RNASEH2A/MCM2/CDC7/CACYBP/GINS4/MCM3/DNA2/DTL/LIG1/FEN1/E2F8/MCM6/SLBP/PRIM2/EME1/RFC5/ESCO2/TIMELESS/NFIA/NFIX	46	6.19256
BP	GO:0000075	cell cycle checkpoint	41/494	216/18670	1.57436e-23	3.09486e-21	2.63149e-21	CCNB1/TRIP13/TTK/PLK1/GTSE1/AURKB/CDC6/CDK1/BUB1B/CENPF/NDC80/MAD2L1/CDC20/BUB1/AURKA/BLM/ZWINT/CDT1/CDC25C/TOP2A/DYNC1LI1/CDC45/TIPRL/DONSON/DNA2/DTL/PRMT1/ZNF207/XRCC3/E2F8/KNTC1/E2F1/CNOT6/EME1/MSH2/ARID3A/TIMELESS/PRKDC/FOXO4/FBXO31/CDC14B	41	5.46608
BP	GO:0033045	regulation of sister chromatid segregation	27/494	80/18670	5.33793e-23	9.96859e-21	8.47607e-21	CCNB1/TRIP13/TTK/PLK1/AURKB/CDC6/BUB1B/CENPF/NDC80/MAD2L1/CDC20/BUB1/CENPE/DLGAP5/TACC3/CDT1/PTTG1/CDCA5/SFPQ/DYNC1LI1/PTTG3P/FBXO5/RAD21/ZNF207/XRCC3/FEN1/HNRNPU	27	5.19615
BP	GO:0006261	DNA-dependent DNA replication	34/494	153/18670	5.076e-22	9.02803e-20	7.67634e-20	MCM10/DSCC1/MCM4/GINS1/CDC6/RECQL4/RFC4/DBF4/BLM/POLD1/CDT1/CCNE2/POLQ/CCNE1/CDC45/RAD51/FBXO5/DONSON/RFC2/RNASEH2A/MCM2/CDC7/GINS4/MCM3/DNA2/LIG1/FEN1/E2F8/MCM6/SLBP/PRIM2/EME1/RFC5/TIMELESS	34	5.83095
BP	GO:0007093	mitotic cell cycle checkpoint	35/494	165/18670	6.40618e-22	1.08759e-19	9.24758e-20	CCNB1/TRIP13/TTK/PLK1/GTSE1/AURKB/CDC6/CDK1/BUB1B/CENPF/NDC80/MAD2L1/CDC20/BUB1/AURKA/BLM/ZWINT/CDT1/CDC25C/TOP2A/DYNC1LI1/DONSON/PRMT1/ZNF207/XRCC3/E2F8/KNTC1/E2F1/CNOT6/EME1/MSH2/ARID3A/PRKDC/FOXO4/FBXO31	35	5.23996
BP	GO:0010965	regulation of mitotic sister chromatid separation	23/494	57/18670	7.28824e-22	1.18355e-19	1.00634e-19	CCNB1/TRIP13/TTK/PLK1/AURKB/CDC6/BUB1B/CENPF/NDC80/MAD2L1/CDC20/BUB1/CENPE/DLGAP5/TACC3/CDT1/PTTG1/DYNC1LI1/PTTG3P/FBXO5/RAD21/ZNF207/XRCC3	23	4.79583
BP	GO:0051304	chromosome separation	27/494	90/18670	1.87052e-21	2.911e-19	2.47516e-19	CCNB1/TRIP13/TTK/PLK1/AURKB/CDC6/BUB1B/CENPF/NDC80/MAD2L1/CDC20/BUB1/CENPE/DLGAP5/TACC3/NCAPH/CDT1/PTTG1/TOP2A/DYNC1LI1/PTTG3P/FBXO5/RAD21/ZNF207/XRCC3/NCAPD2/EME1	27	5.19615
BP	GO:0051306	mitotic sister chromatid separation	23/494	60/18670	2.98228e-21	4.36811e-19	3.71411e-19	CCNB1/TRIP13/TTK/PLK1/AURKB/CDC6/BUB1B/CENPF/NDC80/MAD2L1/CDC20/BUB1/CENPE/DLGAP5/TACC3/CDT1/PTTG1/DYNC1LI1/PTTG3P/FBXO5/RAD21/ZNF207/XRCC3	23	4.79583
BP	GO:0010948	negative regulation of cell cycle process	49/494	361/18670	3.04072e-21	4.36811e-19	3.71411e-19	CCNB1/TRIP13/TTK/PLK1/GTSE1/AURKB/CDC6/CDK1/BUB1B/EZH2/CENPF/NDC80/MAD2L1/CDC20/BUB1/NEK2/AURKA/BLM/MTBP/CCNF/CDT1/CDC25C/PTTG1/DYNC1LI1/RRM2/RAD51/PTTG3P/FBXO5/RAD21/DONSON/CDC7/PSMD14/DTL/PRMT1/ZNF207/XRCC3/E2F8/CBX3/E2F1/FBXO43/EED/CNOT6/CDK4/ARID3A/PRKDC/KAT2B/FOXO4/FBXO31/CDC14B	49	5.85714
BP	GO:0033047	regulation of mitotic sister chromatid segregation	24/494	68/18670	4.0811e-21	5.64552e-19	4.80026e-19	CCNB1/TRIP13/TTK/PLK1/AURKB/CDC6/BUB1B/CENPF/NDC80/MAD2L1/CDC20/BUB1/CENPE/DLGAP5/TACC3/CDT1/PTTG1/DYNC1LI1/PTTG3P/FBXO5/RAD21/ZNF207/XRCC3/HNRNPU	24	4.89898
BP	GO:1905818	regulation of chromosome separation	23/494	62/18670	7.24656e-21	9.66639e-19	8.21912e-19	CCNB1/TRIP13/TTK/PLK1/AURKB/CDC6/BUB1B/CENPF/NDC80/MAD2L1/CDC20/BUB1/CENPE/DLGAP5/TACC3/CDT1/PTTG1/DYNC1LI1/PTTG3P/FBXO5/RAD21/ZNF207/XRCC3	23	4.79583
BP	GO:0045787	positive regulation of cell cycle	50/494	389/18670	1.3167e-20	1.69582e-18	1.44192e-18	CCNB1/GTSE1/UBE2C/AURKB/CDC6/CDK1/EZH2/NDC80/SPAG5/MAD2L1/DBF4/AURKA/CDC25A/DLGAP5/CKS2/MTBP/ECT2/KIF23/CDT1/CDC25C/NUSAP1/CDCA5/SFPQ/DYNC1LI1/CCNE1/CDC45/KIF14/FBXO5/CDC25B/RAD21/CDC7/RCC2/DTL/PRMT1/RACGAP1/GPSM2/XRCC3/FEN1/E2F8/E2F1/MYBBP1A/PLK4/HNRNPU/CNOT6/KIF20B/CDK4/ARID3A/CYP1A1/FOXO4/CDC14B	50	6.22254
BP	GO:2000816	negative regulation of mitotic sister chromatid separation	19/494	39/18670	3.20967e-20	3.99604e-18	3.39774e-18	CCNB1/TRIP13/TTK/PLK1/AURKB/BUB1B/CENPF/NDC80/MAD2L1/CDC20/BUB1/CDT1/PTTG1/DYNC1LI1/PTTG3P/FBXO5/RAD21/ZNF207/XRCC3	19	4.3589
BP	GO:1905819	negative regulation of chromosome separation	19/494	40/18670	5.96578e-20	7.1878e-18	6.11163e-18	CCNB1/TRIP13/TTK/PLK1/AURKB/BUB1B/CENPF/NDC80/MAD2L1/CDC20/BUB1/CDT1/PTTG1/DYNC1LI1/PTTG3P/FBXO5/RAD21/ZNF207/XRCC3	19	4.3589
BP	GO:0007091	metaphase/anaphase transition of mitotic cell cycle	21/494	54/18670	1.1401e-19	1.33072e-17	1.13148e-17	CCNB1/TRIP13/TTK/PLK1/AURKB/CDC6/BUB1B/CENPF/NDC80/MAD2L1/CDC20/BUB1/CENPE/DLGAP5/TACC3/CDT1/DYNC1LI1/FBXO5/RAD21/ZNF207/XRCC3	21	4.58258
BP	GO:0033048	negative regulation of mitotic sister chromatid segregation	19/494	42/18670	1.93322e-19	2.18806e-17	1.86046e-17	CCNB1/TRIP13/TTK/PLK1/AURKB/BUB1B/CENPF/NDC80/MAD2L1/CDC20/BUB1/CDT1/PTTG1/DYNC1LI1/PTTG3P/FBXO5/RAD21/ZNF207/XRCC3	19	4.3589
BP	GO:0044784	metaphase/anaphase transition of cell cycle	21/494	56/18670	2.80971e-19	3.08655e-17	2.62443e-17	CCNB1/TRIP13/TTK/PLK1/AURKB/CDC6/BUB1B/CENPF/NDC80/MAD2L1/CDC20/BUB1/CENPE/DLGAP5/TACC3/CDT1/DYNC1LI1/FBXO5/RAD21/ZNF207/XRCC3	21	4.58258
BP	GO:0045930	negative regulation of mitotic cell cycle	45/494	338/18670	3.00794e-19	3.20991e-17	2.72931e-17	CCNB1/TRIP13/TTK/PLK1/GTSE1/AURKB/CDC6/CDK1/BUB1B/EZH2/CENPF/NDC80/MAD2L1/CDC20/BUB1/AURKA/BLM/MTBP/ZWINT/CDT1/CDC25C/PTTG1/TOP2A/DYNC1LI1/PTTG3P/FBXO5/RAD21/DONSON/PSMD14/PRMT1/ZNF207/XRCC3/E2F8/KNTC1/E2F1/SCRIB/CNOT6/EME1/MSH2/CDK4/ARID3A/PRKDC/FOXO4/FBXO31/CDC14B	45	5.81378
BP	GO:0033046	negative regulation of sister chromatid segregation	19/494	44/18670	5.80477e-19	6.02245e-17	5.12076e-17	CCNB1/TRIP13/TTK/PLK1/AURKB/BUB1B/CENPF/NDC80/MAD2L1/CDC20/BUB1/CDT1/PTTG1/DYNC1LI1/PTTG3P/FBXO5/RAD21/ZNF207/XRCC3	19	4.3589
BP	GO:0034502	protein localization to chromosome	24/494	82/18670	6.27713e-19	6.33651e-17	5.3878e-17	CCT6A/CCT5/CENPA/TTK/PLK1/AURKB/CDK1/EZH2/NDC80/PPHLN1/CCT2/MTBP/CCT3/CDT1/CDCA5/GNL3/CCT8/TCP1/RAD21/RCC2/DKC1/MSH2/ESCO2/ESR1	24	4.49073
BP	GO:0030071	regulation of mitotic metaphase/anaphase transition	20/494	51/18670	7.02164e-19	6.90154e-17	5.86823e-17	CCNB1/TRIP13/TTK/PLK1/AURKB/CDC6/BUB1B/CENPF/NDC80/MAD2L1/CDC20/BUB1/CENPE/DLGAP5/CDT1/DYNC1LI1/FBXO5/RAD21/ZNF207/XRCC3	20	4.47214
BP	GO:0051985	negative regulation of chromosome segregation	19/494	45/18670	9.80372e-19	9.38895e-17	7.98322e-17	CCNB1/TRIP13/TTK/PLK1/AURKB/BUB1B/CENPF/NDC80/MAD2L1/CDC20/BUB1/CDT1/PTTG1/DYNC1LI1/PTTG3P/FBXO5/RAD21/ZNF207/XRCC3	19	4.3589
BP	GO:0045839	negative regulation of mitotic nuclear division	20/494	52/18670	1.1134e-18	1.03964e-16	8.83985e-17	CCNB1/TRIP13/TTK/PLK1/AURKB/BUB1B/CENPF/NDC80/MAD2L1/CDC20/BUB1/MTBP/CDT1/PTTG1/DYNC1LI1/PTTG3P/FBXO5/RAD21/ZNF207/XRCC3	20	4.47214
BP	GO:0051784	negative regulation of nuclear division	21/494	60/18670	1.51023e-18	1.37579e-16	1.1698e-16	CCNB1/TRIP13/TTK/PLK1/AURKB/BUB1B/CENPF/NDC80/MAD2L1/CDC20/BUB1/MTBP/CDT1/PTTG1/DYNC1LI1/PTTG3P/FBXO5/RAD21/ZNF207/XRCC3/FBXO43	21	4.58258
BP	GO:1902099	regulation of metaphase/anaphase transition of cell cycle	20/494	53/18670	1.74492e-18	1.55173e-16	1.31941e-16	CCNB1/TRIP13/TTK/PLK1/AURKB/CDC6/BUB1B/CENPF/NDC80/MAD2L1/CDC20/BUB1/CENPE/DLGAP5/CDT1/DYNC1LI1/FBXO5/RAD21/ZNF207/XRCC3	20	4.47214
BP	GO:0051321	meiotic cell cycle	38/494	249/18670	1.83914e-18	1.59749e-16	1.35831e-16	TRIP13/TTK/PLK1/EXO1/NUF2/BUB1B/TUBG1/CDC20/BUB1/NEK2/AURKA/KIF18A/CDC25A/CKS2/NCAPH/CDC25C/PTTG1/CCNE2/TOP2A/RAD54B/ASPM/CCNE1/RAD51/FANCD2/PTTG3P/FBXO5/CDC25B/RAD21/XRCC2/PKMYT1/MASTL/FBXO43/NCAPD2/MND1/SMC4/EME1/RAD54L/SUN2	38	5.83997
BP	GO:0071103	DNA conformation change	43/494	327/18670	3.11902e-18	2.64762e-16	2.25121e-16	CCNB1/CENPA/DSCC1/MCM4/GINS1/HJURP/CDK1/NCAPG/RECQL4/RFC4/BLM/CENPO/CENPW/OIP5/CHAF1B/CENPL/NCAPH/ASF1B/NUSAP1/CDCA5/TOP2A/PIF1/POLQ/RAD54B/CDC45/RAD51/CENPH/CENPM/ERCC6L/CENPK/RFC2/MCM2/GINS4/MCM3/HELLS/CENPI/DNA2/MCM6/NCAPD2/SMC4/SRPK1/RFC5/RAD54L	43	6.55744
BP	GO:1903046	meiotic cell cycle process	33/494	188/18670	4.51827e-18	3.75017e-16	3.18869e-16	TRIP13/TTK/PLK1/NUF2/BUB1B/TUBG1/CDC20/BUB1/AURKA/KIF18A/CDC25A/CKS2/NCAPH/CDC25C/PTTG1/CCNE2/TOP2A/RAD54B/ASPM/CCNE1/RAD51/FANCD2/PTTG3P/FBXO5/CDC25B/RAD21/MASTL/FBXO43/NCAPD2/MND1/SMC4/EME1/RAD54L	33	5.74456
BP	GO:0044786	cell cycle DNA replication	22/494	71/18670	4.6699e-18	3.79175e-16	3.22404e-16	MCM4/GINS1/RFC4/DBF4/POLD1/CDT1/CDC45/RAD51/FBXO5/DONSON/RFC2/MCM2/CDC7/MCM3/DNA2/LIG1/FEN1/E2F8/MCM6/SLBP/PRIM2/RFC5	22	4.69042
BP	GO:0045841	negative regulation of mitotic metaphase/anaphase transition	17/494	36/18670	6.29273e-18	5.00071e-16	4.25199e-16	CCNB1/TRIP13/TTK/PLK1/AURKB/BUB1B/CENPF/NDC80/MAD2L1/CDC20/BUB1/CDT1/DYNC1LI1/FBXO5/RAD21/ZNF207/XRCC3	17	4.12311
BP	GO:1902100	negative regulation of metaphase/anaphase transition of cell cycle	17/494	37/18670	1.13605e-17	8.83991e-16	7.51639e-16	CCNB1/TRIP13/TTK/PLK1/AURKB/BUB1B/CENPF/NDC80/MAD2L1/CDC20/BUB1/CDT1/DYNC1LI1/FBXO5/RAD21/ZNF207/XRCC3	17	4.12311
BP	GO:0044839	cell cycle G2/M phase transition	38/494	266/18670	1.82783e-17	1.39325e-15	1.18465e-15	CCNB1/PLK1/GTSE1/AURKB/CDC6/CDK1/CENPF/FOXM1/CEP72/TUBG1/TPX2/NEK2/AURKA/BLM/CDC25A/MELK/CDC25C/CCNB2/KIF14/FBXO5/CDC25B/RAD21/DONSON/CDC7/PKMYT1/RCC2/PSMD14/MASTL/DTL/HMMR/DYNLL1/HAUS5/PLK4/CDK4/CEP78/HAUS1/FOXO4/CDC14B	38	5.51553
BP	GO:0051052	regulation of DNA metabolic process	48/494	429/18670	2.5291e-17	1.88924e-15	1.60638e-15	CCT6A/GTPBP4/CCT5/KPNA2/DSCC1/AURKB/CDC6/CDK1/FOXM1/RFC4/DBF4/PPHLN1/NEK2/BLM/CCT2/UBE2N/MAPKAPK5/CCT3/DNMT1/CDT1/RAD51AP1/GNL3/PIF1/POLQ/HNRNPC/RAD51/PRKCD/FBXO5/TRIM28/CCT8/TCP1/DONSON/RFC2/CDC7/CACYBP/DNA2/FANCB/DKC1/E2F8/FUS/ZNF93/SMG5/HNRNPU/MSH2/RFC5/ESCO2/TIMELESS/PRKDC	48	6.9282
BP	GO:0033260	nuclear DNA replication	20/494	60/18670	3.04507e-17	2.23006e-15	1.89618e-15	MCM4/GINS1/RFC4/DBF4/POLD1/CDT1/CDC45/RAD51/DONSON/RFC2/MCM2/CDC7/MCM3/DNA2/LIG1/FEN1/MCM6/SLBP/PRIM2/RFC5	20	4.47214
BP	GO:0000723	telomere maintenance	30/494	162/18670	3.27173e-17	2.34998e-15	1.99814e-15	CCT6A/CCT5/AURKB/EXO1/RECQL4/RFC4/NEK2/BLM/CCT2/POLD1/MAPKAPK5/CCT3/CCNE2/GNL3/PIF1/HNRNPC/CCNE1/RAD51/CCT8/TCP1/RFC2/DNA2/DKC1/XRCC3/FEN1/SMG5/HNRNPU/PRIM2/RFC5/PRKDC	30	5.47723
BP	GO:0000086	G2/M transition of mitotic cell cycle	36/494	247/18670	6.85294e-17	4.82939e-15	4.10632e-15	CCNB1/PLK1/AURKB/CDC6/CDK1/CENPF/FOXM1/CEP72/TUBG1/TPX2/NEK2/AURKA/BLM/CDC25A/MELK/CDC25C/CCNB2/KIF14/FBXO5/CDC25B/RAD21/DONSON/CDC7/PKMYT1/RCC2/PSMD14/MASTL/DTL/HMMR/DYNLL1/HAUS5/PLK4/CDK4/CEP78/HAUS1/FOXO4	36	5.66667
BP	GO:1901988	negative regulation of cell cycle phase transition	37/494	267/18670	1.35727e-16	9.38782e-15	7.98226e-15	CCNB1/TRIP13/TTK/PLK1/GTSE1/AURKB/CDC6/CDK1/BUB1B/EZH2/CENPF/NDC80/MAD2L1/CDC20/BUB1/AURKA/BLM/CDT1/CDC25C/DYNC1LI1/FBXO5/RAD21/DONSON/PSMD14/DTL/PRMT1/ZNF207/XRCC3/E2F8/E2F1/CNOT6/CDK4/ARID3A/PRKDC/FOXO4/FBXO31/CDC14B	37	5.09637
BP	GO:1902749	regulation of cell cycle G2/M phase transition	33/494	213/18670	2.18812e-16	1.48593e-14	1.26345e-14	CCNB1/PLK1/GTSE1/AURKB/CDC6/CDK1/CENPF/CEP72/TUBG1/TPX2/NEK2/AURKA/BLM/CDC25A/CDC25C/KIF14/FBXO5/CDC25B/RAD21/DONSON/CDC7/RCC2/PSMD14/DTL/HMMR/DYNLL1/HAUS5/PLK4/CDK4/CEP78/HAUS1/FOXO4/CDC14B	33	5.04825
BP	GO:0051054	positive regulation of DNA metabolic process	34/494	228/18670	2.51031e-16	1.67429e-14	1.42361e-14	CCT6A/CCT5/DSCC1/AURKB/CDK1/FOXM1/RFC4/DBF4/PPHLN1/NEK2/CCT2/UBE2N/MAPKAPK5/CCT3/DNMT1/CDT1/GNL3/RAD51/PRKCD/TRIM28/CCT8/TCP1/RFC2/CDC7/CACYBP/DNA2/FANCB/DKC1/E2F8/FUS/MSH2/RFC5/TIMELESS/PRKDC	34	5.83095
BP	GO:0032200	telomere organization	30/494	175/18670	3.02453e-16	1.98186e-14	1.68514e-14	CCT6A/CCT5/AURKB/EXO1/RECQL4/RFC4/NEK2/BLM/CCT2/POLD1/MAPKAPK5/CCT3/CCNE2/GNL3/PIF1/HNRNPC/CCNE1/RAD51/CCT8/TCP1/RFC2/DNA2/DKC1/XRCC3/FEN1/SMG5/HNRNPU/PRIM2/RFC5/PRKDC	30	5.47723
BP	GO:1901991	negative regulation of mitotic cell cycle phase transition	35/494	248/18670	5.20575e-16	3.35233e-14	2.85041e-14	CCNB1/TRIP13/TTK/PLK1/GTSE1/AURKB/CDC6/CDK1/BUB1B/EZH2/CENPF/NDC80/MAD2L1/CDC20/BUB1/AURKA/BLM/CDT1/CDC25C/DYNC1LI1/FBXO5/RAD21/DONSON/PSMD14/PRMT1/ZNF207/XRCC3/E2F8/E2F1/CNOT6/CDK4/ARID3A/PRKDC/FOXO4/FBXO31	35	5.23996
BP	GO:0010389	regulation of G2/M transition of mitotic cell cycle	31/494	196/18670	1.00167e-15	6.3411e-14	5.3917e-14	CCNB1/PLK1/AURKB/CDC6/CDK1/CENPF/CEP72/TUBG1/TPX2/NEK2/AURKA/BLM/CDC25A/CDC25C/KIF14/FBXO5/CDC25B/RAD21/DONSON/CDC7/RCC2/PSMD14/DTL/HMMR/DYNLL1/HAUS5/PLK4/CDK4/CEP78/HAUS1/FOXO4	31	5.20855
BP	GO:2001251	negative regulation of chromosome organization	27/494	146/18670	1.33496e-15	8.31011e-14	7.06591e-14	CCNB1/TRIP13/TTK/PLK1/AURKB/BUB1B/CENPF/NDC80/MAD2L1/CDC20/BUB1/DNMT1/CDT1/PTTG1/TOP2A/PIF1/HNRNPC/DYNC1LI1/PTTG3P/FBXO5/RAD21/MCM2/ZNF207/XRCC3/ATAD2/SMARCB1/HNRNPU	27	5.19615
BP	GO:0140013	meiotic nuclear division	29/494	172/18670	1.50956e-15	9.24296e-14	7.85909e-14	TRIP13/TTK/PLK1/NUF2/BUB1B/CDC20/BUB1/AURKA/KIF18A/CKS2/NCAPH/PTTG1/CCNE2/TOP2A/RAD54B/ASPM/CCNE1/RAD51/FANCD2/PTTG3P/FBXO5/CDC25B/RAD21/MASTL/FBXO43/MND1/SMC4/EME1/RAD54L	29	5.38516
BP	GO:0007094	mitotic spindle assembly checkpoint	15/494	34/18670	2.06801e-15	1.18831e-13	1.01039e-13	CCNB1/TRIP13/TTK/PLK1/AURKB/BUB1B/CENPF/NDC80/MAD2L1/CDC20/BUB1/CDT1/DYNC1LI1/ZNF207/XRCC3	15	3.87298
BP	GO:0031577	spindle checkpoint	15/494	34/18670	2.06801e-15	1.18831e-13	1.01039e-13	CCNB1/TRIP13/TTK/PLK1/AURKB/BUB1B/CENPF/NDC80/MAD2L1/CDC20/BUB1/CDT1/DYNC1LI1/ZNF207/XRCC3	15	3.87298
BP	GO:0071173	spindle assembly checkpoint	15/494	34/18670	2.06801e-15	1.18831e-13	1.01039e-13	CCNB1/TRIP13/TTK/PLK1/AURKB/BUB1B/CENPF/NDC80/MAD2L1/CDC20/BUB1/CDT1/DYNC1LI1/ZNF207/XRCC3	15	3.87298
BP	GO:0071174	mitotic spindle checkpoint	15/494	34/18670	2.06801e-15	1.18831e-13	1.01039e-13	CCNB1/TRIP13/TTK/PLK1/AURKB/BUB1B/CENPF/NDC80/MAD2L1/CDC20/BUB1/CDT1/DYNC1LI1/ZNF207/XRCC3	15	3.87298
BP	GO:0051225	spindle assembly	23/494	108/18670	7.15189e-15	4.04732e-13	3.44135e-13	MYBL2/PLK1/AURKB/TPX2/SPAG5/CDC20/NEK2/AURKA/CENPW/KIF4A/KIF23/KIFC1/ASPM/KIF11/FBXO5/MSTO1/RACGAP1/ZNF207/GPSM2/HAUS5/BIRC5/HNRNPU/HAUS1	23	4.79583
BP	GO:0031570	DNA integrity checkpoint	27/494	157/18670	8.77367e-15	4.89099e-13	4.15871e-13	CCNB1/PLK1/GTSE1/CDC6/CDK1/AURKA/BLM/CDT1/CDC25C/TOP2A/CDC45/TIPRL/DONSON/DNA2/DTL/PRMT1/E2F8/E2F1/CNOT6/EME1/MSH2/ARID3A/TIMELESS/PRKDC/FOXO4/FBXO31/CDC14B	27	4.04145
BP	GO:0006310	DNA recombination	36/494	292/18670	1.45725e-14	8.00416e-13	6.80576e-13	KPNA2/TRIP13/MCM4/EXO1/RECQL4/KIN/BLM/UBE2N/SFPQ/RAD51AP1/MCRS1/TOP2A/PIF1/POLQ/RAD54B/CDC45/RAD51/RAD21/XRCC2/MCM2/CDC7/GINS4/MCM3/PSMD14/FANCB/ACTL6A/XRCC3/FEN1/FUS/MCM6/MND1/EME1/MSH2/RAD54L/TIMELESS/PRKDC	36	6
BP	GO:0000082	G1/S transition of mitotic cell cycle	35/494	279/18670	2.01966e-14	1.09325e-12	9.29567e-13	CCNB1/MCM10/GTSE1/MCM4/CDC6/CDK1/EZH2/CDKN3/DBF4/AURKA/CDC25A/MTBP/IQGAP3/CDT1/CDC25C/CCNE2/CCNE1/CDC45/RRM2/KIF14/FBXO5/MCM2/CDC7/MCM3/PRMT1/E2F8/E2F1/MCM6/PRIM2/CNOT6/CDK4/ARID3A/PRKDC/CYP1A1/FBXO31	35	5.23996
BP	GO:0008608	attachment of spindle microtubules to kinetochore	14/494	32/18670	2.09432e-14	1.11747e-12	9.5016e-13	CCNB1/AURKB/KIF2C/NUF2/NDC80/SPAG5/NEK2/CENPE/ECT2/CDT1/RCC2/RACGAP1/ZNF207/HNRNPU	14	3.74166
BP	GO:0045931	positive regulation of mitotic cell cycle	27/494	163/18670	2.28748e-14	1.20334e-12	1.02318e-12	CCNB1/UBE2C/CDC6/CDK1/NDC80/MAD2L1/AURKA/CDC25A/DLGAP5/MTBP/CDT1/CDC25C/NUSAP1/CDCA5/DYNC1LI1/CCNE1/CDC45/FBXO5/CDC25B/CDC7/RCC2/DTL/XRCC3/HNRNPU/KIF20B/CDK4/CYP1A1	27	4.81125
BP	GO:0006302	double-strand break repair	32/494	248/18670	1.24141e-13	6.43984e-12	5.47565e-12	TRIP13/MCM4/RECQL4/FOXM1/BLM/UBE2N/CDCA5/SFPQ/RAD51AP1/POLQ/RAD54B/CDC45/RAD51/RAD21/XRCC2/MCM2/CDC7/GINS4/MCM3/PSMD14/DNA2/FANCB/XRCC3/FEN1/FUS/MCM6/EME1/MSH2/RAD54L/ESCO2/TIMELESS/PRKDC	32	5.65685
BP	GO:0044843	cell cycle G1/S phase transition	35/494	298/18670	1.47713e-13	7.55766e-12	6.42611e-12	CCNB1/MCM10/GTSE1/MCM4/CDC6/CDK1/EZH2/CDKN3/DBF4/AURKA/CDC25A/MTBP/IQGAP3/CDT1/CDC25C/CCNE2/CCNE1/CDC45/RRM2/KIF14/FBXO5/MCM2/CDC7/MCM3/PRMT1/E2F8/E2F1/MCM6/PRIM2/CNOT6/CDK4/ARID3A/PRKDC/CYP1A1/FBXO31	35	5.23996
BP	GO:0000724	double-strand break repair via homologous recombination	23/494	134/18670	9.09048e-13	4.58824e-11	3.90128e-11	MCM4/RECQL4/BLM/UBE2N/SFPQ/RAD51AP1/POLQ/RAD54B/CDC45/RAD51/XRCC2/MCM2/CDC7/GINS4/MCM3/PSMD14/FANCB/XRCC3/FEN1/FUS/MCM6/RAD54L/TIMELESS	23	4.79583
BP	GO:0000725	recombinational repair	23/494	135/18670	1.0692e-12	5.32459e-11	4.52739e-11	MCM4/RECQL4/BLM/UBE2N/SFPQ/RAD51AP1/POLQ/RAD54B/CDC45/RAD51/XRCC2/MCM2/CDC7/GINS4/MCM3/PSMD14/FANCB/XRCC3/FEN1/FUS/MCM6/RAD54L/TIMELESS	23	4.79583
BP	GO:1901992	positive regulation of mitotic cell cycle phase transition	19/494	91/18670	2.3673e-12	1.1634e-10	9.89218e-11	CCNB1/UBE2C/CDC6/CDK1/CDC25A/DLGAP5/MTBP/CDT1/CDC25C/CDCA5/CCNE1/CDC45/FBXO5/CDC25B/CDC7/RCC2/DTL/CDK4/CYP1A1	19	3.90007
BP	GO:1901989	positive regulation of cell cycle phase transition	20/494	106/18670	4.57978e-12	2.22149e-10	1.88888e-10	CCNB1/UBE2C/CDC6/CDK1/EZH2/CDC25A/DLGAP5/MTBP/CDT1/CDC25C/CDCA5/CCNE1/CDC45/FBXO5/CDC25B/CDC7/RCC2/DTL/CDK4/CYP1A1	20	4.02492
BP	GO:0072331	signal transduction by p53 class mediator	31/494	267/18670	5.12171e-12	2.43875e-10	2.07361e-10	CCNB1/GTSE1/AURKB/CDK1/EXO1/FOXM1/RFC4/TPX2/RNF34/AURKA/BLM/MAPKAPK5/CDC25C/HDAC2/E2F2/PAK1IP1/EEF1E1/RFC2/NOP2/DNA2/PRMT1/E2F8/TBP/E2F1/MYBBP1A/CNOT6/MSH2/RFC5/ARID3A/PRKAG1/PDK2	31	5.20855
BP	GO:0032392	DNA geometric change	21/494	119/18670	5.15826e-12	2.43875e-10	2.07361e-10	DSCC1/MCM4/GINS1/RECQL4/RFC4/BLM/TOP2A/PIF1/POLQ/RAD54B/CDC45/RAD51/ERCC6L/RFC2/MCM2/GINS4/MCM3/DNA2/MCM6/RFC5/RAD54L	21	4.58258
BP	GO:0032508	DNA duplex unwinding	20/494	110/18670	9.38238e-12	4.3804e-10	3.72456e-10	DSCC1/MCM4/GINS1/RECQL4/RFC4/BLM/TOP2A/PIF1/POLQ/RAD54B/CDC45/RAD51/ERCC6L/RFC2/MCM2/GINS4/MCM3/DNA2/MCM6/RFC5	20	4.47214
BP	GO:0090307	mitotic spindle assembly	15/494	56/18670	1.06039e-11	4.88957e-10	4.1575e-10	MYBL2/PLK1/AURKB/TPX2/CDC20/NEK2/KIF4A/KIF23/KIFC1/KIF11/MSTO1/RACGAP1/ZNF207/BIRC5/HNRNPU	15	3.87298
BP	GO:0000910	cytokinesis	24/494	171/18670	2.51658e-11	1.14627e-09	9.74649e-10	KIF20A/CENPA/PLK1/AURKB/CDC6/AURKA/CEP55/KIF4A/PRC1/ECT2/KIF23/UNC119/CDT1/NUSAP1/ANLN/KIF14/CDC25B/RACGAP1/E2F8/MYO19/INCENP/KIF20B/RHOB/CDC14B	24	4.08248
BP	GO:2001252	positive regulation of chromosome organization	24/494	174/18670	3.65977e-11	1.6469e-09	1.40032e-09	CCT6A/CCT5/CCNB1/AURKB/PPHLN1/NEK2/CCT2/DLGAP5/UBE2N/MAPKAPK5/CCT3/DNMT1/CDT1/SFPQ/GNL3/TRIM28/CCT8/TCP1/RAD21/DKC1/FEN1/SMARCB1/EED/HNRNPU	24	4.89898
BP	GO:0044774	mitotic DNA integrity checkpoint	19/494	106/18670	4.0403e-11	1.79649e-09	1.52752e-09	CCNB1/GTSE1/CDC6/CDK1/AURKA/BLM/CDC25C/TOP2A/DONSON/PRMT1/E2F8/E2F1/CNOT6/EME1/MSH2/ARID3A/PRKDC/FOXO4/FBXO31	19	3.44124
BP	GO:0051383	kinetochore organization	10/494	21/18670	4.17421e-11	1.82669e-09	1.5532e-09	CENPA/NUF2/CENPF/NDC80/CENPE/CENPW/CDT1/CENPH/CENPK/SMC4	10	3.16228
BP	GO:0061982	meiosis I cell cycle process	20/494	119/18670	4.20604e-11	1.82669e-09	1.5532e-09	TRIP13/PLK1/AURKA/CDC25A/CKS2/CDC25C/PTTG1/CCNE2/TOP2A/RAD54B/CCNE1/RAD51/FANCD2/PTTG3P/FBXO5/CDC25B/RAD21/MND1/EME1/RAD54L	20	4.47214
BP	GO:1900182	positive regulation of protein localization to nucleus	16/494	74/18670	7.43062e-11	3.19004e-09	2.71242e-09	CCT6A/CCT5/RAN/PLK1/GTSE1/CDK1/CCT2/ECT2/CCT3/MCRS1/PRKCD/TRIM28/CCT8/TCP1/DKC1/PIK3R2	16	4
BP	GO:0071897	DNA biosynthetic process	25/494	196/18670	8.03236e-11	3.40919e-09	2.89876e-09	CCT6A/CCT5/DSCC1/AURKB/CENPF/RFC4/NEK2/CCT2/POLD1/MAPKAPK5/CCT3/PIF1/POLQ/HNRNPC/CCT8/TCP1/RFC2/DTL/LIN9/LIG1/DKC1/SMG5/HNRNPU/RFC5/TK2	25	4.6
BP	GO:0032210	regulation of telomere maintenance via telomerase	14/494	54/18670	8.45433e-11	3.54797e-09	3.01676e-09	CCT6A/CCT5/AURKB/NEK2/CCT2/MAPKAPK5/CCT3/PIF1/HNRNPC/CCT8/TCP1/DKC1/SMG5/HNRNPU	14	3.74166
BP	GO:1904816	positive regulation of protein localization to chromosome, telomeric region	8/494	12/18670	1.02448e-10	4.25161e-09	3.61505e-09	CCT6A/CCT5/CCT2/CCT3/GNL3/CCT8/TCP1/DKC1	8	2.82843
BP	GO:0051310	metaphase plate congression	14/494	57/18670	1.8639e-10	7.65017e-09	6.50477e-09	CCNB1/KIF2C/NUF2/CENPF/CDCA8/NDC80/SPAG5/CENPE/KIF18A/CDT1/CDCA5/KIFC1/KIF14/HNRNPU	14	3.74166
BP	GO:0000077	DNA damage checkpoint	21/494	145/18670	2.46578e-10	1.00105e-08	8.51174e-09	CCNB1/PLK1/GTSE1/CDK1/AURKA/BLM/CDC25C/TIPRL/DONSON/DTL/PRMT1/E2F8/E2F1/CNOT6/EME1/MSH2/ARID3A/PRKDC/FOXO4/FBXO31/CDC14B	21	3.27327
BP	GO:0010639	negative regulation of organelle organization	35/494	395/18670	4.4786e-10	1.79866e-08	1.52936e-08	CCNB1/TRIP13/TTK/PLK1/AURKB/BUB1B/CENPF/NDC80/MAD2L1/CDC20/BUB1/NEK2/MTBP/CCNF/DNMT1/CDT1/PTTG1/TOP2A/PIF1/HNRNPC/DYNC1LI1/PRKCD/PTTG3P/FBXO5/RAD21/MCM2/DNM1L/ZNF207/XRCC3/FBXO43/ATAD2/SMARCB1/HNRNPU/KAT2B/LMOD1	35	5.23996
BP	GO:0006275	regulation of DNA replication	18/494	108/18670	4.59352e-10	1.80598e-08	1.53558e-08	GTPBP4/DSCC1/CDC6/CDK1/RFC4/DBF4/BLM/CDT1/FBXO5/DONSON/RFC2/CDC7/CACYBP/DNA2/E2F8/RFC5/ESCO2/TIMELESS	18	4.24264
BP	GO:2000278	regulation of DNA biosynthetic process	18/494	108/18670	4.59352e-10	1.80598e-08	1.53558e-08	CCT6A/CCT5/DSCC1/AURKB/RFC4/NEK2/CCT2/MAPKAPK5/CCT3/PIF1/HNRNPC/CCT8/TCP1/RFC2/DKC1/SMG5/HNRNPU/RFC5	18	4.24264
BP	GO:1904814	regulation of protein localization to chromosome, telomeric region	8/494	14/18670	5.93111e-10	2.30757e-08	1.96208e-08	CCT6A/CCT5/CCT2/CCT3/GNL3/CCT8/TCP1/DKC1	8	2.82843
BP	GO:0044773	mitotic DNA damage checkpoint	17/494	97/18670	6.23952e-10	2.36813e-08	2.01357e-08	CCNB1/GTSE1/CDK1/AURKA/BLM/CDC25C/DONSON/PRMT1/E2F8/E2F1/CNOT6/EME1/MSH2/ARID3A/PRKDC/FOXO4/FBXO31	17	3.15296
BP	GO:1904356	regulation of telomere maintenance via telomere lengthening	14/494	62/18670	6.24011e-10	2.36813e-08	2.01357e-08	CCT6A/CCT5/AURKB/NEK2/CCT2/MAPKAPK5/CCT3/PIF1/HNRNPC/CCT8/TCP1/DKC1/SMG5/HNRNPU	14	3.74166
BP	GO:0000281	mitotic cytokinesis	15/494	73/18670	6.27698e-10	2.36813e-08	2.01357e-08	KIF20A/CENPA/PLK1/CEP55/KIF4A/ECT2/KIF23/UNC119/CDT1/NUSAP1/ANLN/RACGAP1/INCENP/KIF20B/RHOB	15	3.35659
BP	GO:0006271	DNA strand elongation involved in DNA replication	9/494	20/18670	7.6647e-10	2.86276e-08	2.43415e-08	MCM4/GINS1/RFC4/RNASEH2A/GINS4/MCM3/DNA2/LIG1/FEN1	9	3
BP	GO:0010971	positive regulation of G2/M transition of mitotic cell cycle	10/494	27/18670	8.65474e-10	3.20054e-08	2.72135e-08	CCNB1/CDK1/CDC25A/CDC25C/FBXO5/CDC25B/CDC7/RCC2/DTL/CDK4	10	3.16228
BP	GO:0051303	establishment of chromosome localization	15/494	75/18670	9.37442e-10	3.43269e-08	2.91874e-08	CCNB1/KIF2C/NUF2/CENPF/CDCA8/NDC80/SPAG5/CENPE/KIF18A/DLGAP5/CDT1/CDCA5/KIFC1/KIF14/HNRNPU	15	3.87298
BP	GO:1903405	protein localization to nuclear body	7/494	10/18670	9.75263e-10	3.46915e-08	2.94974e-08	CCT6A/CCT5/CCT2/CCT3/CCT8/TCP1/DKC1	7	2.64575
BP	GO:1904851	positive regulation of establishment of protein localization to telomere	7/494	10/18670	9.75263e-10	3.46915e-08	2.94974e-08	CCT6A/CCT5/CCT2/CCT3/CCT8/TCP1/DKC1	7	2.64575
BP	GO:1904867	protein localization to Cajal body	7/494	10/18670	9.75263e-10	3.46915e-08	2.94974e-08	CCT6A/CCT5/CCT2/CCT3/CCT8/TCP1/DKC1	7	2.64575
BP	GO:0007080	mitotic metaphase plate congression	12/494	44/18670	1.00752e-09	3.55007e-08	3.01854e-08	CCNB1/KIF2C/NUF2/CDCA8/NDC80/CENPE/KIF18A/CDT1/CDCA5/KIFC1/KIF14/HNRNPU	12	3.4641
BP	GO:0050000	chromosome localization	15/494	76/18670	1.13994e-09	3.94735e-08	3.35635e-08	CCNB1/KIF2C/NUF2/CENPF/CDCA8/NDC80/SPAG5/CENPE/KIF18A/DLGAP5/CDT1/CDCA5/KIFC1/KIF14/HNRNPU	15	3.87298
BP	GO:0007127	meiosis I	18/494	114/18670	1.1414e-09	3.94735e-08	3.35635e-08	TRIP13/PLK1/AURKA/CKS2/PTTG1/CCNE2/TOP2A/RAD54B/CCNE1/RAD51/FANCD2/PTTG3P/FBXO5/CDC25B/RAD21/MND1/EME1/RAD54L	18	4.24264
BP	GO:1902969	mitotic DNA replication	8/494	15/18670	1.24158e-09	4.25439e-08	3.61741e-08	MCM4/GINS1/CDC45/RAD51/MCM2/MCM3/LIG1/MCM6	8	2.82843
BP	GO:0032465	regulation of cytokinesis	16/494	89/18670	1.35344e-09	4.59553e-08	3.90748e-08	KIF20A/PLK1/AURKB/CDC6/AURKA/PRC1/ECT2/KIF23/KIF14/CDC25B/RACGAP1/E2F8/MYO19/INCENP/KIF20B/CDC14B	16	3.5
BP	GO:0034508	centromere complex assembly	13/494	56/18670	1.78218e-09	5.99678e-08	5.09893e-08	CENPA/HJURP/CENPF/CENPE/CENPO/CENPW/OIP5/CENPL/CENPH/CENPM/CENPK/HELLS/CENPI	13	3.60555
BP	GO:0006270	DNA replication initiation	11/494	37/18670	1.82902e-09	6.09559e-08	5.18294e-08	MCM10/MCM4/CDC6/CDT1/CCNE2/CCNE1/CDC45/MCM2/MCM3/MCM6/PRIM2	11	3.31662
BP	GO:0006323	DNA packaging	24/494	210/18670	1.85822e-09	6.09559e-08	5.18294e-08	CCNB1/CENPA/HJURP/CDK1/NCAPG/CENPO/CENPW/OIP5/CHAF1B/CENPL/NCAPH/ASF1B/NUSAP1/CDCA5/TOP2A/CENPH/CENPM/CENPK/MCM2/HELLS/CENPI/NCAPD2/SMC4/SRPK1	24	4.89898
BP	GO:2000573	positive regulation of DNA biosynthetic process	14/494	67/18670	1.8605e-09	6.09559e-08	5.18294e-08	CCT6A/CCT5/DSCC1/AURKB/RFC4/NEK2/CCT2/MAPKAPK5/CCT3/CCT8/TCP1/RFC2/DKC1/RFC5	14	3.74166
BP	GO:1904666	regulation of ubiquitin protein ligase activity	9/494	22/18670	2.16522e-09	7.03224e-08	5.97937e-08	PLK1/UBE2C/MAD2L1/CDC20/UBE2S/FBXO5/DNM1L/MASTL/CDC14B	9	2.33333
BP	GO:0065004	protein-DNA complex assembly	26/494	248/18670	2.52303e-09	8.12372e-08	6.90742e-08	CENPA/MCM4/HJURP/CENPF/CENPE/CENPO/CENPW/OIP5/CHAF1B/CENPL/CDT1/ASF1B/SMARCA4/CDC45/RAD51/CENPH/CENPM/CENPK/MCM2/MCM3/HELLS/CENPI/TBP/MCM6/SMARCB1/ESR1	26	4.70679
BP	GO:0000727	double-strand break repair via break-induced replication	7/494	11/18670	2.6208e-09	8.29548e-08	7.05347e-08	MCM4/CDC45/MCM2/CDC7/GINS4/MCM3/MCM6	7	2.64575
BP	GO:0070203	regulation of establishment of protein localization to telomere	7/494	11/18670	2.6208e-09	8.29548e-08	7.05347e-08	CCT6A/CCT5/CCT2/CCT3/CCT8/TCP1/DKC1	7	2.64575
BP	GO:1902751	positive regulation of cell cycle G2/M phase transition	10/494	30/18670	2.86996e-09	8.93471e-08	7.59699e-08	CCNB1/CDK1/CDC25A/CDC25C/FBXO5/CDC25B/CDC7/RCC2/DTL/CDK4	10	3.16228
BP	GO:0031145	anaphase-promoting complex-dependent catabolic process	15/494	81/18670	2.89451e-09	8.93471e-08	7.59699e-08	CCNB1/PLK1/UBE2C/AURKB/CDK1/BUB1B/MAD2L1/CDC20/ANAPC7/AURKA/UBE2S/PTTG1/FBXO5/PSMD14/FBXO31	15	3.35659
BP	GO:0032204	regulation of telomere maintenance	15/494	81/18670	2.89451e-09	8.93471e-08	7.59699e-08	CCT6A/CCT5/AURKB/NEK2/CCT2/MAPKAPK5/CCT3/GNL3/PIF1/HNRNPC/CCT8/TCP1/DKC1/SMG5/HNRNPU	15	3.87298
BP	GO:0007004	telomere maintenance via telomerase	14/494	70/18670	3.41658e-09	1.04598e-07	8.89372e-08	CCT6A/CCT5/AURKB/NEK2/CCT2/MAPKAPK5/CCT3/PIF1/HNRNPC/CCT8/TCP1/DKC1/SMG5/HNRNPU	14	3.74166
BP	GO:0010833	telomere maintenance via telomere lengthening	15/494	82/18670	3.45757e-09	1.04992e-07	8.92725e-08	CCT6A/CCT5/AURKB/NEK2/CCT2/MAPKAPK5/CCT3/PIF1/HNRNPC/RAD51/CCT8/TCP1/DKC1/SMG5/HNRNPU	15	3.87298
BP	GO:0072401	signal transduction involved in DNA integrity checkpoint	14/494	73/18670	6.07866e-09	1.79352e-07	1.52499e-07	CCNB1/PLK1/GTSE1/CDK1/AURKA/CDC25C/DTL/PRMT1/E2F8/E2F1/CNOT6/ARID3A/PRKDC/CDC14B	14	3.20713
BP	GO:0072422	signal transduction involved in DNA damage checkpoint	14/494	73/18670	6.07866e-09	1.79352e-07	1.52499e-07	CCNB1/PLK1/GTSE1/CDK1/AURKA/CDC25C/DTL/PRMT1/E2F8/E2F1/CNOT6/ARID3A/PRKDC/CDC14B	14	3.20713
BP	GO:0051988	regulation of attachment of spindle microtubules to kinetochore	7/494	12/18670	6.14648e-09	1.79352e-07	1.52499e-07	CCNB1/SPAG5/NEK2/ECT2/RCC2/RACGAP1/HNRNPU	7	2.64575
BP	GO:0070202	regulation of establishment of protein localization to chromosome	7/494	12/18670	6.14648e-09	1.79352e-07	1.52499e-07	CCT6A/CCT5/CCT2/CCT3/CCT8/TCP1/DKC1	7	2.64575
BP	GO:1990173	protein localization to nucleoplasm	7/494	12/18670	6.14648e-09	1.79352e-07	1.52499e-07	CCT6A/CCT5/CCT2/CCT3/CCT8/TCP1/DKC1	7	2.64575
BP	GO:0072395	signal transduction involved in cell cycle checkpoint	14/494	74/18670	7.31773e-09	2.11874e-07	1.80152e-07	CCNB1/PLK1/GTSE1/CDK1/AURKA/CDC25C/DTL/PRMT1/E2F8/E2F1/CNOT6/ARID3A/PRKDC/CDC14B	14	3.20713
BP	GO:0061640	cytoskeleton-dependent cytokinesis	16/494	100/18670	7.89716e-09	2.26891e-07	1.92921e-07	KIF20A/CENPA/PLK1/AURKB/CEP55/KIF4A/ECT2/KIF23/UNC119/CDT1/NUSAP1/ANLN/RACGAP1/INCENP/KIF20B/RHOB	16	3.5
BP	GO:0043044	ATP-dependent chromatin remodeling	15/494	88/18670	9.51562e-09	2.71304e-07	2.30684e-07	CENPA/HJURP/CENPO/CENPW/OIP5/CENPL/SMARCA4/HDAC2/HNRNPC/CENPH/CENPM/CENPK/CENPI/ACTL6A/SMARCB1	15	3.87298
BP	GO:0000079	regulation of cyclin-dependent protein serine/threonine kinase activity	16/494	102/18670	1.06012e-08	2.99965e-07	2.55053e-07	GTPBP4/CCNB1/PLK1/CDC6/CDKN3/BLM/CDC25A/CKS2/CCNF/CDC25C/CCNB2/CCNE2/CCNE1/PKMYT1/CDK4/KAT2B	16	3.5
BP	GO:0032212	positive regulation of telomere maintenance via telomerase	10/494	34/18670	1.13891e-08	3.19837e-07	2.7195e-07	CCT6A/CCT5/AURKB/NEK2/CCT2/MAPKAPK5/CCT3/CCT8/TCP1/DKC1	10	3.16228
BP	GO:0006278	RNA-dependent DNA biosynthetic process	14/494	77/18670	1.25357e-08	3.49409e-07	2.97095e-07	CCT6A/CCT5/AURKB/NEK2/CCT2/MAPKAPK5/CCT3/PIF1/HNRNPC/CCT8/TCP1/DKC1/SMG5/HNRNPU	14	3.74166
BP	GO:0090329	regulation of DNA-dependent DNA replication	12/494	54/18670	1.2884e-08	3.56458e-07	3.03088e-07	DSCC1/RFC4/DBF4/BLM/CDT1/FBXO5/DONSON/RFC2/CDC7/E2F8/RFC5/TIMELESS	12	3.4641
BP	GO:0045132	meiotic chromosome segregation	15/494	90/18670	1.30828e-08	3.59297e-07	3.05502e-07	TRIP13/TTK/PLK1/NUF2/BUB1B/BUB1/NCAPH/PTTG1/CCNE2/TOP2A/CCNE1/FANCD2/PTTG3P/SMC4/EME1	15	3.87298
BP	GO:0071824	protein-DNA complex subunit organization	27/494	288/18670	1.403e-08	3.82497e-07	3.25229e-07	CENPA/MCM4/HJURP/CENPF/CENPE/CENPO/CENPW/OIP5/CHAF1B/CENPL/CDT1/ASF1B/SMARCD1/SMARCA4/CDC45/RAD51/CENPH/CENPM/CENPK/MCM2/MCM3/HELLS/CENPI/TBP/MCM6/SMARCB1/ESR1	27	4.81125
BP	GO:0006338	chromatin remodeling	21/494	182/18670	1.62659e-08	4.40241e-07	3.74328e-07	SUV39H2/CENPA/HJURP/CENPO/CENPW/OIP5/CENPL/SMARCD1/SMARCA4/HDAC2/HNRNPC/CENPH/CENPM/CENPK/HELLS/CENPI/ACTL6A/CBX3/SMARCB1/KAT2B/ESR1	21	3.7097
BP	GO:0022616	DNA strand elongation	9/494	27/18670	1.81308e-08	4.87183e-07	4.14241e-07	MCM4/GINS1/RFC4/RNASEH2A/GINS4/MCM3/DNA2/LIG1/FEN1	9	3
BP	GO:1904029	regulation of cyclin-dependent protein kinase activity	16/494	106/18670	1.87003e-08	4.98898e-07	4.24202e-07	GTPBP4/CCNB1/PLK1/CDC6/CDKN3/BLM/CDC25A/CKS2/CCNF/CDC25C/CCNB2/CCNE2/CCNE1/PKMYT1/CDK4/KAT2B	16	3.5
BP	GO:0060249	anatomical structure homeostasis	34/494	437/18670	2.18002e-08	5.77473e-07	4.91013e-07	CCT6A/CCT5/AURKB/EXO1/RECQL4/RFC4/NEK2/BLM/CCT2/POLD1/MAPKAPK5/CCT3/CCNE2/GNL3/PIF1/HNRNPC/CCNE1/RAD51/CCT8/TCP1/RFC2/DNA2/P2RX4/DKC1/XRCC3/FEN1/SMG5/LPCAT1/HNRNPU/PRIM2/RFC5/PRKDC/ADRB2/PDK4	34	5.14496
BP	GO:0051984	positive regulation of chromosome segregation	9/494	28/18670	2.60963e-08	6.86406e-07	5.83636e-07	CCNB1/CDC6/DLGAP5/CDT1/SFPQ/RAD21/RCC2/FEN1/HNRNPU	9	3
BP	GO:1904358	positive regulation of telomere maintenance via telomere lengthening	10/494	37/18670	2.81723e-08	7.35828e-07	6.25659e-07	CCT6A/CCT5/AURKB/NEK2/CCT2/MAPKAPK5/CCT3/CCT8/TCP1/DKC1	10	3.16228
BP	GO:0071459	protein localization to chromosome, centromeric region	8/494	21/18670	3.41261e-08	8.85147e-07	7.52621e-07	CENPA/TTK/AURKB/CDK1/NDC80/MTBP/CDT1/RCC2	8	2.82843
BP	GO:0031055	chromatin remodeling at centromere	11/494	48/18670	3.71548e-08	9.57058e-07	8.13765e-07	CENPA/HJURP/CENPO/CENPW/OIP5/CENPL/CENPH/CENPM/CENPK/HELLS/CENPI	11	3.31662
BP	GO:1904874	positive regulation of telomerase RNA localization to Cajal body	7/494	15/18670	4.66033e-08	1.19221e-06	1.01371e-06	CCT6A/CCT5/CCT2/CCT3/CCT8/TCP1/DKC1	7	2.64575
BP	GO:0006403	RNA localization	23/494	230/18670	5.12071e-08	1.30108e-06	1.10628e-06	CCT6A/CCT5/RAN/CPSF6/NOP58/CCT2/CCT3/SFPQ/NCBP2/U2AF2/NUP37/CCT8/TCP1/NUP107/NUP43/IGF2BP2/DKC1/SMG5/NUP210/SLBP/LTV1/HNRNPU/RAE1	23	4.79583
BP	GO:1900180	regulation of protein localization to nucleus	16/494	116/18670	6.91104e-08	1.7441e-06	1.48297e-06	CCT6A/CCT5/RAN/PLK1/GTSE1/CDK1/CCT2/ECT2/CCT3/MCRS1/PRKCD/TRIM28/CCT8/TCP1/DKC1/PIK3R2	16	4
BP	GO:0007143	female meiotic nuclear division	9/494	31/18670	7.09703e-08	1.77902e-06	1.51266e-06	TRIP13/TTK/PLK1/AURKA/NCAPH/TOP2A/FBXO5/CDC25B/MASTL	9	3
BP	GO:0032206	positive regulation of telomere maintenance	11/494	51/18670	7.28977e-08	1.81515e-06	1.54339e-06	CCT6A/CCT5/AURKB/NEK2/CCT2/MAPKAPK5/CCT3/GNL3/CCT8/TCP1/DKC1	11	3.31662
BP	GO:0031571	mitotic G1 DNA damage checkpoint	12/494	63/18670	8.0749e-08	1.97646e-06	1.68054e-06	CCNB1/GTSE1/CDK1/AURKA/CDC25C/PRMT1/E2F8/E2F1/CNOT6/ARID3A/PRKDC/FBXO31	12	2.88675
BP	GO:0044819	mitotic G1/S transition checkpoint	12/494	63/18670	8.0749e-08	1.97646e-06	1.68054e-06	CCNB1/GTSE1/CDK1/AURKA/CDC25C/PRMT1/E2F8/E2F1/CNOT6/ARID3A/PRKDC/FBXO31	12	2.88675
BP	GO:0070200	establishment of protein localization to telomere	7/494	16/18670	8.09636e-08	1.97646e-06	1.68054e-06	CCT6A/CCT5/CCT2/CCT3/CCT8/TCP1/DKC1	7	2.64575
BP	GO:0031023	microtubule organizing center organization	17/494	133/18670	8.46591e-08	2.05326e-06	1.74584e-06	WDR62/PLK1/CDK1/CEP72/NEK2/AURKA/CCNF/KIF11/XRCC2/STIL/XRCC3/HAUS5/PLK4/CHORDC1/HAUS1/KAT2B/BCAS3	17	3.15296
BP	GO:0007050	cell cycle arrest	23/494	237/18670	8.90104e-08	2.14486e-06	1.82373e-06	CCNB1/CDC123/GTSE1/CDK1/FOXM1/CDKN3/AURKA/MTBP/CDC25C/PRMT1/E2F8/E2F1/MYBBP1A/CNOT6/KIF20B/MSH2/CDK4/ARID3A/PRKAG1/KAT2B/FOXO4/CDC14B/HBP1	23	3.12772
BP	GO:0044783	G1 DNA damage checkpoint	12/494	64/18670	9.70265e-08	2.31682e-06	1.96994e-06	CCNB1/GTSE1/CDK1/AURKA/CDC25C/PRMT1/E2F8/E2F1/CNOT6/ARID3A/PRKDC/FBXO31	12	2.88675
BP	GO:2000045	regulation of G1/S transition of mitotic cell cycle	20/494	184/18670	9.7387e-08	2.31682e-06	1.96994e-06	CCNB1/GTSE1/CDC6/CDK1/EZH2/AURKA/MTBP/CDC25C/CCNE1/CDC45/KIF14/PRMT1/E2F8/E2F1/CNOT6/CDK4/ARID3A/PRKDC/CYP1A1/FBXO31	20	3.57771
BP	GO:0051302	regulation of cell division	19/494	168/18670	1.08334e-07	2.56093e-06	2.17751e-06	KIF20A/PLK1/AURKB/CDC6/KIF18B/AURKA/BLM/PRC1/ECT2/KIF23/ASPM/KIF14/CDC25B/RACGAP1/E2F8/MYO19/INCENP/KIF20B/CDC14B	19	3.90007
BP	GO:0034501	protein localization to kinetochore	7/494	17/18670	1.34505e-07	3.15959e-06	2.68653e-06	TTK/AURKB/CDK1/NDC80/MTBP/CDT1/RCC2	7	2.64575
BP	GO:0006336	DNA replication-independent nucleosome assembly	11/494	54/18670	1.36386e-07	3.18376e-06	2.70708e-06	CENPA/HJURP/CENPO/CENPW/OIP5/CENPL/ASF1B/CENPH/CENPM/CENPK/CENPI	11	3.31662
BP	GO:0034724	DNA replication-independent nucleosome organization	11/494	55/18670	1.6646e-07	3.86167e-06	3.2835e-06	CENPA/HJURP/CENPO/CENPW/OIP5/CENPL/ASF1B/CENPH/CENPM/CENPK/CENPI	11	3.31662
BP	GO:0034080	CENP-A containing nucleosome assembly	10/494	44/18670	1.69949e-07	3.89423e-06	3.31118e-06	CENPA/HJURP/CENPO/CENPW/OIP5/CENPL/CENPH/CENPM/CENPK/CENPI	10	3.16228
BP	GO:0061641	CENP-A containing chromatin organization	10/494	44/18670	1.69949e-07	3.89423e-06	3.31118e-06	CENPA/HJURP/CENPO/CENPW/OIP5/CENPL/CENPH/CENPM/CENPK/CENPI	10	3.16228
BP	GO:0007098	centrosome cycle	16/494	124/18670	1.77963e-07	4.05299e-06	3.44617e-06	WDR62/PLK1/CDK1/CEP72/NEK2/AURKA/CCNF/KIF11/XRCC2/STIL/XRCC3/HAUS5/PLK4/CHORDC1/HAUS1/KAT2B	16	3.5
BP	GO:1904872	regulation of telomerase RNA localization to Cajal body	7/494	18/18670	2.1509e-07	4.86885e-06	4.13988e-06	CCT6A/CCT5/CCT2/CCT3/CCT8/TCP1/DKC1	7	2.64575
BP	GO:0072431	signal transduction involved in mitotic G1 DNA damage checkpoint	11/494	57/18670	2.44721e-07	5.47324e-06	4.65378e-06	CCNB1/GTSE1/CDK1/AURKA/CDC25C/PRMT1/E2F8/E2F1/CNOT6/ARID3A/PRKDC	11	3.31662
BP	GO:1902400	intracellular signal transduction involved in G1 DNA damage checkpoint	11/494	57/18670	2.44721e-07	5.47324e-06	4.65378e-06	CCNB1/GTSE1/CDK1/AURKA/CDC25C/PRMT1/E2F8/E2F1/CNOT6/ARID3A/PRKDC	11	3.31662
BP	GO:1904668	positive regulation of ubiquitin protein ligase activity	6/494	12/18670	2.68709e-07	5.97397e-06	5.07954e-06	PLK1/UBE2C/CDC20/UBE2S/MASTL/CDC14B	6	1.63299
BP	GO:0090670	RNA localization to Cajal body	7/494	19/18670	3.32812e-07	7.22704e-06	6.145e-06	CCT6A/CCT5/CCT2/CCT3/CCT8/TCP1/DKC1	7	2.64575
BP	GO:0090671	telomerase RNA localization to Cajal body	7/494	19/18670	3.32812e-07	7.22704e-06	6.145e-06	CCT6A/CCT5/CCT2/CCT3/CCT8/TCP1/DKC1	7	2.64575
BP	GO:0090672	telomerase RNA localization	7/494	19/18670	3.32812e-07	7.22704e-06	6.145e-06	CCT6A/CCT5/CCT2/CCT3/CCT8/TCP1/DKC1	7	2.64575
BP	GO:0090685	RNA localization to nucleus	7/494	19/18670	3.32812e-07	7.22704e-06	6.145e-06	CCT6A/CCT5/CCT2/CCT3/CCT8/TCP1/DKC1	7	2.64575
BP	GO:0072413	signal transduction involved in mitotic cell cycle checkpoint	11/494	59/18670	3.53903e-07	7.55331e-06	6.42241e-06	CCNB1/GTSE1/CDK1/AURKA/CDC25C/PRMT1/E2F8/E2F1/CNOT6/ARID3A/PRKDC	11	3.31662
BP	GO:1902402	signal transduction involved in mitotic DNA damage checkpoint	11/494	59/18670	3.53903e-07	7.55331e-06	6.42241e-06	CCNB1/GTSE1/CDK1/AURKA/CDC25C/PRMT1/E2F8/E2F1/CNOT6/ARID3A/PRKDC	11	3.31662
BP	GO:1902403	signal transduction involved in mitotic DNA integrity checkpoint	11/494	59/18670	3.53903e-07	7.55331e-06	6.42241e-06	CCNB1/GTSE1/CDK1/AURKA/CDC25C/PRMT1/E2F8/E2F1/CNOT6/ARID3A/PRKDC	11	3.31662
BP	GO:0070198	protein localization to chromosome, telomeric region	8/494	28/18670	4.42727e-07	9.34228e-06	7.94354e-06	CCT6A/CCT5/CCT2/CCT3/GNL3/CCT8/TCP1/DKC1	8	2.82843
BP	GO:0071168	protein localization to chromatin	8/494	28/18670	4.42727e-07	9.34228e-06	7.94354e-06	PLK1/EZH2/PPHLN1/CDCA5/RAD21/MSH2/ESCO2/ESR1	8	2.12132
BP	GO:1902806	regulation of cell cycle G1/S phase transition	20/494	202/18670	4.47838e-07	9.39705e-06	7.99011e-06	CCNB1/GTSE1/CDC6/CDK1/EZH2/AURKA/MTBP/CDC25C/CCNE1/CDC45/KIF14/PRMT1/E2F8/E2F1/CNOT6/CDK4/ARID3A/PRKDC/CYP1A1/FBXO31	20	3.57771
BP	GO:0042770	signal transduction in response to DNA damage	16/494	133/18670	4.71287e-07	9.83383e-06	8.3615e-06	CCNB1/PLK1/GTSE1/CDK1/FOXM1/AURKA/CDC25C/EEF1E1/DTL/PRMT1/E2F8/E2F1/CNOT6/ARID3A/PRKDC/CDC14B	16	3.5
BP	GO:0051315	attachment of mitotic spindle microtubules to kinetochore	6/494	13/18670	4.87876e-07	1.01234e-05	8.60773e-06	KIF2C/NUF2/NDC80/CENPE/CDT1/HNRNPU	6	2.44949
BP	GO:0070507	regulation of microtubule cytoskeleton organization	19/494	186/18670	5.36973e-07	1.10806e-05	9.42162e-06	PLK1/SKA1/TPX2/SPAG5/SKA3/NEK2/AURKA/KIF18A/TACC3/CCNF/KIF11/STIL/GPSM2/XRCC3/PLK4/HNRNPU/RAE1/CHORDC1/KAT2B	19	3.90007
BP	GO:1903829	positive regulation of cellular protein localization	26/494	324/18670	5.66638e-07	1.16285e-05	9.8875e-06	CCT6A/CCT5/RAN/PLK1/GTSE1/CDK1/SAE1/NDC80/CCT2/ECT2/CCT3/CDT1/MCRS1/GNL3/PRKCD/TRIM28/CCT8/TCP1/YWHAZ/GPSM2/DKC1/E2F1/PIK3R2/KIF20B/SORL1/BCAS3	26	4.31455
BP	GO:0032467	positive regulation of cytokinesis	9/494	40/18670	7.78809e-07	1.58954e-05	1.35155e-05	AURKB/CDC6/ECT2/KIF23/KIF14/CDC25B/RACGAP1/KIF20B/CDC14B	9	2.33333
BP	GO:0006268	DNA unwinding involved in DNA replication	6/494	14/18670	8.34707e-07	1.66718e-05	1.41757e-05	MCM4/RECQL4/BLM/RAD51/MCM2/MCM6	6	2.44949
BP	GO:0090231	regulation of spindle checkpoint	6/494	14/18670	8.34707e-07	1.66718e-05	1.41757e-05	CCNB1/NDC80/MAD2L1/CDT1/DYNC1LI1/XRCC3	6	2.44949
BP	GO:0090266	regulation of mitotic cell cycle spindle assembly checkpoint	6/494	14/18670	8.34707e-07	1.66718e-05	1.41757e-05	CCNB1/NDC80/MAD2L1/CDT1/DYNC1LI1/XRCC3	6	2.44949
BP	GO:1903504	regulation of mitotic spindle checkpoint	6/494	14/18670	8.34707e-07	1.66718e-05	1.41757e-05	CCNB1/NDC80/MAD2L1/CDT1/DYNC1LI1/XRCC3	6	2.44949
BP	GO:0051438	regulation of ubiquitin-protein transferase activity	10/494	52/18670	8.96337e-07	1.78075e-05	1.51414e-05	PLK1/UBE2C/MAD2L1/CDC20/UBE2N/UBE2S/FBXO5/DNM1L/MASTL/CDC14B	10	2.52982
BP	GO:0071156	regulation of cell cycle arrest	14/494	108/18670	9.85929e-07	1.94838e-05	1.65667e-05	CCNB1/GTSE1/CDK1/FOXM1/AURKA/CDC25C/PRMT1/E2F8/E2F1/MYBBP1A/CNOT6/CDK4/ARID3A/FOXO4	14	3.20713
BP	GO:0071158	positive regulation of cell cycle arrest	12/494	82/18670	1.58984e-06	3.12529e-05	2.65737e-05	CCNB1/GTSE1/CDK1/AURKA/CDC25C/PRMT1/E2F8/E2F1/MYBBP1A/CNOT6/ARID3A/FOXO4	12	2.88675
BP	GO:0006913	nucleocytoplasmic transport	26/494	343/18670	1.65956e-06	3.24526e-05	2.75937e-05	RAN/KPNA2/GTSE1/CPSF6/ECT2/NCBP2/U2AF2/SNRPD1/PRKCD/NUP37/TRIM28/NUP107/NUP43/SNRPB/SNRPF/PIK3R2/SMG5/NUP210/SLBP/LTV1/PPP1CC/RAE1/CSE1L/PRKAG1/DRD1/RANBP3L	26	4.31455
BP	GO:0006977	DNA damage response, signal transduction by p53 class mediator resulting in cell cycle arrest	10/494	56/18670	1.83508e-06	3.5698e-05	3.03532e-05	CCNB1/GTSE1/CDK1/AURKA/CDC25C/PRMT1/E2F8/E2F1/CNOT6/ARID3A	10	3.16228
BP	GO:0051169	nuclear transport	26/494	346/18670	1.95052e-06	3.77472e-05	3.20956e-05	RAN/KPNA2/GTSE1/CPSF6/ECT2/NCBP2/U2AF2/SNRPD1/PRKCD/NUP37/TRIM28/NUP107/NUP43/SNRPB/SNRPF/PIK3R2/SMG5/NUP210/SLBP/LTV1/PPP1CC/RAE1/CSE1L/PRKAG1/DRD1/RANBP3L	26	4.31455
BP	GO:0034504	protein localization to nucleus	22/494	262/18670	2.00051e-06	3.85149e-05	3.27484e-05	CCT6A/CCT5/RAN/KPNA2/PLK1/GTSE1/CDK1/CCT2/ECT2/CCT3/MCRS1/PRKCD/TRIM28/CCT8/TCP1/NUP107/DKC1/PIK3R2/HNRNPU/CSE1L/SUN2/DRD1	22	3.83761
BP	GO:0051382	kinetochore assembly	6/494	16/18670	2.1276e-06	4.07517e-05	3.46503e-05	CENPA/CENPF/CENPE/CENPW/CENPH/CENPK	6	2.44949
BP	GO:0070199	establishment of protein localization to chromosome	7/494	25/18670	2.76601e-06	5.27095e-05	4.48177e-05	CCT6A/CCT5/CCT2/CCT3/CCT8/TCP1/DKC1	7	2.64575
BP	GO:0051231	spindle elongation	5/494	10/18670	2.8698e-06	5.44098e-05	4.62634e-05	AURKB/KIF4A/PRC1/KIF23/RACGAP1	5	2.23607
BP	GO:0007076	mitotic chromosome condensation	6/494	17/18670	3.21474e-06	6.06417e-05	5.15623e-05	NCAPG/NCAPH/NUSAP1/CDCA5/NCAPD2/SMC4	6	2.44949
BP	GO:0030261	chromosome condensation	9/494	47/18670	3.29244e-06	6.17952e-05	5.25431e-05	CCNB1/CDK1/NCAPG/NCAPH/NUSAP1/CDCA5/TOP2A/NCAPD2/SMC4	9	3
BP	GO:0006333	chromatin assembly or disassembly	18/494	191/18670	3.41196e-06	6.37183e-05	5.41783e-05	SUV39H2/CENPA/HJURP/CENPO/CENPW/OIP5/CHAF1B/CENPL/ASF1B/SMARCD1/SMARCA4/CENPH/CENPM/CENPK/MCM2/HELLS/CENPI/SMARCB1	18	4.24264
BP	GO:0043486	histone exchange	10/494	60/18670	3.53461e-06	6.56804e-05	5.58466e-05	CENPA/HJURP/CENPO/CENPW/OIP5/CENPL/CENPH/CENPM/CENPK/CENPI	10	3.16228
BP	GO:0051445	regulation of meiotic cell cycle	9/494	49/18670	4.73632e-06	8.7575e-05	7.44631e-05	TRIP13/TTK/CDC20/CDC25A/CDC25C/ASPM/FBXO5/CDC25B/FBXO43	9	3
BP	GO:0032201	telomere maintenance via semi-conservative replication	7/494	27/18670	4.88059e-06	8.97981e-05	7.63534e-05	RFC4/POLD1/RFC2/DNA2/FEN1/PRIM2/RFC5	7	2.64575
BP	GO:0035404	histone-serine phosphorylation	5/494	11/18670	5.14679e-06	9.42316e-05	8.01231e-05	CCNB1/AURKB/AURKA/VRK1/DRD1	5	1.34164
BP	GO:0007062	sister chromatid cohesion	10/494	63/18670	5.58135e-06	0.00010169	8.64644e-05	PLK1/DSCC1/BUB1B/CDC20/BUB1/CDCA5/SFPQ/RAD21/FEN1/ESCO2	10	3.16228
BP	GO:2000134	negative regulation of G1/S transition of mitotic cell cycle	14/494	125/18670	5.73653e-06	0.000104009	8.8437e-05	CCNB1/GTSE1/CDK1/EZH2/AURKA/CDC25C/PRMT1/E2F8/E2F1/CNOT6/CDK4/ARID3A/PRKDC/FBXO31	14	3.20713
BP	GO:0032886	regulation of microtubule-based process	19/494	218/18670	5.80374e-06	0.00010472	8.90408e-05	PLK1/SKA1/TPX2/SPAG5/SKA3/NEK2/AURKA/KIF18A/TACC3/CCNF/KIF11/STIL/GPSM2/XRCC3/PLK4/HNRNPU/RAE1/CHORDC1/KAT2B	19	3.90007
BP	GO:1901796	regulation of signal transduction by p53 class mediator	17/494	180/18670	6.17711e-06	0.000110921	9.43135e-05	AURKB/EXO1/RFC4/TPX2/RNF34/AURKA/BLM/MAPKAPK5/HDAC2/PAK1IP1/EEF1E1/RFC2/NOP2/DNA2/TBP/RFC5/PRKAG1	17	4.12311
BP	GO:0032506	cytokinetic process	8/494	39/18670	6.78486e-06	0.000121251	0.000103097	KIF20A/AURKB/CEP55/ECT2/KIF23/ANLN/RACGAP1/KIF20B	8	2.82843
BP	GO:0007018	microtubule-based movement	22/494	283/18670	6.99758e-06	0.000124457	0.000105823	KIF20A/KIF2C/KIF18B/CENPE/KIF18A/DLGAP5/TMEM201/KIF4A/KIF23/KIF15/SFPQ/KIFC1/DYNC1LI1/KIF11/KIF14/RACGAP1/DYNLL1/IFT52/WASF1/HNRNPU/KIF20B/SUN2	22	4.26401
BP	GO:0070192	chromosome organization involved in meiotic cell cycle	10/494	65/18670	7.45665e-06	0.000131993	0.000112231	TRIP13/BUB1B/BUB1/NCAPH/CCNE2/CCNE1/RAD51/FANCD2/NCAPD2/SMC4	10	3.16228
BP	GO:0000083	regulation of transcription involved in G1/S transition of mitotic cell cycle	7/494	29/18670	8.19343e-06	0.000144351	0.000122739	CDC6/CDT1/CCNE1/CDC45/RRM2/FBXO5/E2F1	7	2.64575
BP	GO:0007077	mitotic nuclear envelope disassembly	5/494	12/18670	8.63113e-06	0.000151349	0.000128688	CCNB1/PLK1/CDK1/CCNB2/VRK1	5	2.23607
BP	GO:0036297	interstrand cross-link repair	9/494	53/18670	9.30158e-06	0.000162343	0.000138037	RAD51AP1/UBE2T/RAD51/FANCD2/FANCI/FANCB/XRCC3/FANCG/EME1	9	3
BP	GO:1902807	negative regulation of cell cycle G1/S phase transition	14/494	131/18670	9.92072e-06	0.000172344	0.00014654	CCNB1/GTSE1/CDK1/EZH2/AURKA/CDC25C/PRMT1/E2F8/E2F1/CNOT6/CDK4/ARID3A/PRKDC/FBXO31	14	3.20713
BP	GO:0070317	negative regulation of G0 to G1 transition	8/494	41/18670	1.00589e-05	0.000173935	0.000147893	EZH2/RRM2/RAD51/CDC7/CBX3/E2F1/EED/FOXO4	8	2.12132
BP	GO:0031572	G2 DNA damage checkpoint	7/494	31/18670	1.31857e-05	0.000226952	0.000192972	PLK1/CDK1/BLM/DONSON/DTL/FOXO4/CDC14B	7	1.13389
BP	GO:0048511	rhythmic process	22/494	295/18670	1.3478e-05	0.000230919	0.000196345	SUV39H2/CDK1/EZH2/SFPQ/HDAC2/TOP2A/DNM1L/DTL/CBX3/MYBBP1A/PPP1CC/HNRNPU/CDK4/TIMELESS/PRKDC/FZD4/KAT2B/RORA/HLF/CRY2/KLF9/ESR1	22	1.70561
BP	GO:0046605	regulation of centrosome cycle	9/494	58/18670	1.988e-05	0.00033905	0.000288287	NEK2/AURKA/CCNF/KIF11/STIL/XRCC3/PLK4/CHORDC1/KAT2B	9	2.33333
BP	GO:0051443	positive regulation of ubiquitin-protein transferase activity	7/494	33/18670	2.04626e-05	0.0003474	0.000295387	PLK1/UBE2C/CDC20/UBE2N/UBE2S/MASTL/CDC14B	7	1.88982
BP	GO:0070316	regulation of G0 to G1 transition	8/494	45/18670	2.06813e-05	0.000349524	0.000297193	EZH2/RRM2/RAD51/CDC7/CBX3/E2F1/EED/FOXO4	8	2.12132
BP	GO:1902750	negative regulation of cell cycle G2/M phase transition	12/494	105/18670	2.16121e-05	0.000363609	0.000309169	PLK1/AURKB/CDC6/CDK1/AURKA/BLM/RAD21/DONSON/PSMD14/DTL/FOXO4/CDC14B	12	2.3094
BP	GO:0030330	DNA damage response, signal transduction by p53 class mediator	12/494	107/18670	2.61704e-05	0.000438325	0.000372698	CCNB1/GTSE1/CDK1/FOXM1/AURKA/CDC25C/EEF1E1/PRMT1/E2F8/E2F1/CNOT6/ARID3A	12	3.4641
BP	GO:0045023	G0 to G1 transition	8/494	47/18670	2.8804e-05	0.00048028	0.000408372	EZH2/RRM2/RAD51/CDC7/CBX3/E2F1/EED/FOXO4	8	2.12132
BP	GO:0031396	regulation of protein ubiquitination	17/494	204/18670	3.18513e-05	0.000528731	0.000449569	GTPBP4/PLK1/UBE2C/MAD2L1/CDC20/UBE2N/MTBP/UBE2S/U2AF2/FBXO5/DNM1L/PRMT3/MASTL/FANCI/PRR7/ADRB2/CDC14B	17	3.15296
BP	GO:0034728	nucleosome organization	16/494	184/18670	3.22666e-05	0.000533255	0.000453415	CENPA/HJURP/CENPO/CENPW/OIP5/CHAF1B/CENPL/ASF1B/SMARCD1/SMARCA4/CENPH/CENPM/CENPK/MCM2/CENPI/SMARCB1	16	4
BP	GO:0045740	positive regulation of DNA replication	7/494	36/18670	3.7332e-05	0.000614252	0.000522285	CDK1/DBF4/CDT1/CDC7/CACYBP/DNA2/E2F8	7	2.64575
BP	GO:0000076	DNA replication checkpoint	5/494	16/18670	4.35991e-05	0.000708011	0.000602006	CDC6/CDT1/CDC45/DNA2/TIMELESS	5	2.23607
BP	GO:0030397	membrane disassembly	5/494	16/18670	4.35991e-05	0.000708011	0.000602006	CCNB1/PLK1/CDK1/CCNB2/VRK1	5	2.23607
BP	GO:0051081	nuclear envelope disassembly	5/494	16/18670	4.35991e-05	0.000708011	0.000602006	CCNB1/PLK1/CDK1/CCNB2/VRK1	5	2.23607
BP	GO:1903320	regulation of protein modification by small protein conjugation or removal	18/494	231/18670	4.5841e-05	0.000741195	0.000630222	GTPBP4/PLK1/UBE2C/MAD2L1/CDC20/UBE2N/MTBP/UBE2S/GNL3/U2AF2/FBXO5/DNM1L/PRMT3/MASTL/FANCI/PRR7/ADRB2/CDC14B	18	3.29983
BP	GO:0016572	histone phosphorylation	7/494	38/18670	5.39175e-05	0.000864299	0.000734895	CCNB1/AURKB/CDK1/AURKA/VRK1/PRKCD/DRD1	7	1.88982
BP	GO:0097064	ncRNA export from nucleus	7/494	38/18670	5.39175e-05	0.000864299	0.000734895	RAN/NCBP2/NUP37/NUP107/NUP43/NUP210/RAE1	7	2.64575
BP	GO:1903311	regulation of mRNA metabolic process	22/494	324/18670	5.62477e-05	0.0008978	0.00076338	CCNB1/RBM17/CPSF6/DHX34/NCBP2/U2AF2/HNRNPC/SF3B4/PRKCD/DAZAP1/YWHAZ/PSMD14/IGF2BP2/HNRNPM/E2F1/HNRNPL/FASTKD3/HNRNPU/RBM38/SNRPA/SRPK1/CPEB3	22	4.26401
BP	GO:0031503	protein-containing complex localization	20/494	281/18670	6.36143e-05	0.00101106	0.000859683	RAN/CEP72/SFPQ/NCBP2/U2AF2/NUP37/NUP107/NUP43/RCC2/DYNLL1/SMG5/NUP210/SCRIB/SLBP/LTV1/BIRC5/IFT52/HNRNPU/RAE1/GPHN	20	4.02492
BP	GO:0051053	negative regulation of DNA metabolic process	14/494	156/18670	7.06504e-05	0.00111352	0.000946798	GTPBP4/CDC6/BLM/PIF1/POLQ/HNRNPC/FBXO5/TRIM28/DONSON/FANCB/ZNF93/HNRNPU/MSH2/TIMELESS	14	3.74166
BP	GO:0007131	reciprocal meiotic recombination	8/494	53/18670	7.06568e-05	0.00111352	0.000946798	TRIP13/TOP2A/RAD54B/RAD51/RAD21/MND1/EME1/RAD54L	8	2.82843
BP	GO:0035825	homologous recombination	8/494	54/18670	8.10487e-05	0.00127192	0.00108149	TRIP13/TOP2A/RAD54B/RAD51/RAD21/MND1/EME1/RAD54L	8	2.82843
BP	GO:0051255	spindle midzone assembly	4/494	10/18670	8.9581e-05	0.00139	0.00118189	AURKB/KIF4A/KIF23/RACGAP1	4	2
BP	GO:0045005	DNA-dependent DNA replication maintenance of fidelity	7/494	41/18670	8.96896e-05	0.00139	0.00118189	BLM/POLD1/RAD51/DONSON/DNA2/EME1/TIMELESS	7	2.64575
BP	GO:0090224	regulation of spindle organization	7/494	41/18670	8.96896e-05	0.00139	0.00118189	PLK1/TPX2/SPAG5/TACC3/GPSM2/HNRNPU/RAE1	7	2.64575
BP	GO:0044380	protein localization to cytoskeleton	8/494	55/18670	9.26767e-05	0.00143036	0.00121621	TTK/CEP72/SPAG5/AURKA/ANLN/STIL/HNRNPU/KIF20B	8	2.82843
BP	GO:1900542	regulation of purine nucleotide metabolic process	13/494	142/18670	0.000103897	0.00159694	0.00135784	CCNB1/CDK1/BEND3/NUP37/NUP107/NUP43/DNM1L/SLC2A6/NUP210/RAE1/PRKAG1/PDK2/PDK4	13	2.49615
BP	GO:0006284	base-excision repair	7/494	42/18670	0.000105199	0.00161033	0.00136923	POLD1/NEIL3/TDG/POLQ/DNA2/LIG1/FEN1	7	2.64575
BP	GO:0007096	regulation of exit from mitosis	5/494	19/18670	0.000108681	0.00165682	0.00140876	UBE2C/CDCA5/ANLN/KNTC1/CDC14B	5	1.34164
BP	GO:0075733	intracellular transport of virus	8/494	57/18670	0.000120095	0.00182339	0.00155039	RAN/KPNA2/NUP37/NUP107/NUP43/VPS37C/NUP210/RAE1	8	2.82843
BP	GO:0044766	multi-organism transport	9/494	73/18670	0.000127642	0.00192234	0.00163453	RAN/KPNA2/NUP37/TCP1/NUP107/NUP43/VPS37C/NUP210/RAE1	9	3
BP	GO:1902579	multi-organism localization	9/494	73/18670	0.000127642	0.00192234	0.00163453	RAN/KPNA2/NUP37/TCP1/NUP107/NUP43/VPS37C/NUP210/RAE1	9	3
BP	GO:0006334	nucleosome assembly	13/494	145/18670	0.000128455	0.00192682	0.00163833	CENPA/HJURP/CENPO/CENPW/OIP5/CHAF1B/CENPL/ASF1B/CENPH/CENPM/CENPK/MCM2/CENPI	13	3.60555
BP	GO:0031497	chromatin assembly	14/494	165/18670	0.000129127	0.00192916	0.00164032	CENPA/HJURP/CENPO/CENPW/OIP5/CHAF1B/CENPL/ASF1B/CENPH/CENPM/CENPK/MCM2/HELLS/CENPI	14	3.74166
BP	GO:0006140	regulation of nucleotide metabolic process	13/494	146/18670	0.000137682	0.00204282	0.00173697	CCNB1/CDK1/BEND3/NUP37/NUP107/NUP43/DNM1L/SLC2A6/NUP210/RAE1/PRKAG1/PDK2/PDK4	13	2.49615
BP	GO:0045835	negative regulation of meiotic nuclear division	4/494	11/18670	0.000137829	0.00204282	0.00173697	TRIP13/TTK/FBXO5/FBXO43	4	2
BP	GO:0010458	exit from mitosis	6/494	31/18670	0.000139602	0.00206093	0.00175236	UBE2C/UBE2S/CDCA5/ANLN/KNTC1/CDC14B	6	1.63299
BP	GO:1901976	regulation of cell cycle checkpoint	6/494	32/18670	0.000168012	0.00247056	0.00210067	CCNB1/NDC80/MAD2L1/CDT1/DYNC1LI1/XRCC3	6	2.44949
BP	GO:0016569	covalent chromatin modification	27/494	474/18670	0.000169286	0.00247954	0.0021083	SUV39H2/CCNB1/AURKB/CDK1/EZH2/BEND3/PPHLN1/AURKA/UBE2N/DNMT1/UHRF1/SFPQ/HDAC2/MCRS1/VRK1/PRKCD/TRIM28/PPP5C/HELLS/PRMT3/PRMT1/YEATS2/ACTL6A/SMARCB1/EED/KAT2B/DRD1	27	4.42635
BP	GO:0046794	transport of virus	8/494	60/18670	0.000173512	0.00253151	0.00215249	RAN/KPNA2/NUP37/NUP107/NUP43/VPS37C/NUP210/RAE1	8	2.82843
BP	GO:0050657	nucleic acid transport	15/494	193/18670	0.000199405	0.00288673	0.00245453	RAN/CPSF6/SFPQ/NCBP2/U2AF2/NUP37/NUP107/NUP43/IGF2BP2/SMG5/NUP210/SLBP/LTV1/HNRNPU/RAE1	15	3.87298
BP	GO:0050658	RNA transport	15/494	193/18670	0.000199405	0.00288673	0.00245453	RAN/CPSF6/SFPQ/NCBP2/U2AF2/NUP37/NUP107/NUP43/IGF2BP2/SMG5/NUP210/SLBP/LTV1/HNRNPU/RAE1	15	3.87298
BP	GO:0040001	establishment of mitotic spindle localization	6/494	33/18670	0.0002008	0.00289571	0.00246216	CENPA/PLK1/NDC80/MAD2L1/NUSAP1/GPSM2	6	2.44949
BP	GO:2000105	positive regulation of DNA-dependent DNA replication	4/494	12/18670	0.000202428	0.00290796	0.00247257	DBF4/CDT1/CDC7/E2F8	4	2
BP	GO:0097711	ciliary basal body-plasma membrane docking	10/494	95/18670	0.0002076	0.00297083	0.00252603	PLK1/CDK1/CEP72/TUBG1/NEK2/DYNLL1/HAUS5/PLK4/CEP78/HAUS1	10	3.16228
BP	GO:0051168	nuclear export	15/494	194/18670	0.000210983	0.00300772	0.0025574	RAN/GTSE1/CPSF6/NCBP2/U2AF2/NUP37/NUP107/NUP43/SMG5/NUP210/SLBP/LTV1/RAE1/CSE1L/RANBP3L	15	3.35659
BP	GO:0046824	positive regulation of nucleocytoplasmic transport	8/494	62/18670	0.000218948	0.0031094	0.00264385	RAN/GTSE1/CPSF6/ECT2/NCBP2/PRKCD/TRIM28/PIK3R2	8	2.82843
BP	GO:0007063	regulation of sister chromatid cohesion	5/494	22/18670	0.0002305	0.00326105	0.0027728	BUB1/CDCA5/SFPQ/RAD21/FEN1	5	2.23607
BP	GO:0051236	establishment of RNA localization	15/494	196/18670	0.000235894	0.00332477	0.00282698	RAN/CPSF6/SFPQ/NCBP2/U2AF2/NUP37/NUP107/NUP43/IGF2BP2/SMG5/NUP210/SLBP/LTV1/HNRNPU/RAE1	15	3.87298
BP	GO:0006409	tRNA export from nucleus	6/494	34/18670	0.000238432	0.00333537	0.00283599	RAN/NUP37/NUP107/NUP43/NUP210/RAE1	6	2.44949
BP	GO:0071431	tRNA-containing ribonucleoprotein complex export from nucleus	6/494	34/18670	0.000238432	0.00333537	0.00283599	RAN/NUP37/NUP107/NUP43/NUP210/RAE1	6	2.44949
BP	GO:0051653	spindle localization	7/494	48/18670	0.00025042	0.00346808	0.00294884	CENPA/PLK1/NDC80/MAD2L1/NUSAP1/ASPM/GPSM2	7	2.64575
BP	GO:0051972	regulation of telomerase activity	7/494	48/18670	0.00025042	0.00346808	0.00294884	AURKB/NEK2/CCT2/MAPKAPK5/PIF1/TCP1/DKC1	7	2.64575
BP	GO:0006405	RNA export from nucleus	12/494	135/18670	0.000250705	0.00346808	0.00294884	RAN/CPSF6/NCBP2/U2AF2/NUP37/NUP107/NUP43/SMG5/NUP210/SLBP/LTV1/RAE1	12	3.4641
BP	GO:0019886	antigen processing and presentation of exogenous peptide antigen via MHC class II	10/494	98/18670	0.000268171	0.00369601	0.00314264	KIF2C/CENPE/KIF18A/KIF4A/KIF23/KIF15/DYNC1LI1/KIF11/RACGAP1/DYNLL1	10	3.16228
BP	GO:0050821	protein stabilization	14/494	178/18670	0.00028532	0.0039138	0.00332782	CCT6A/GTPBP4/CCT5/GTSE1/CCT2/CCT3/PRKCD/CCT8/TCP1/ZNF207/SAV1/DSG1/GPIHBP1/CREBL2	14	1.60357
BP	GO:0000212	meiotic spindle organization	4/494	13/18670	0.000286298	0.0039138	0.00332782	TUBG1/AURKA/ASPM/FBXO5	4	2
BP	GO:0050684	regulation of mRNA processing	12/494	137/18670	0.000287387	0.0039138	0.00332782	CCNB1/RBM17/CPSF6/NCBP2/U2AF2/SF3B4/DAZAP1/HNRNPL/HNRNPU/SNRPA/SRPK1/CPEB3	12	2.88675
BP	GO:0006297	nucleotide-excision repair, DNA gap filling	5/494	23/18670	0.000288165	0.0039138	0.00332782	RFC4/POLD1/RFC2/LIG1/RFC5	5	2.23607
BP	GO:0006611	protein export from nucleus	14/494	179/18670	0.000302208	0.00408966	0.00347735	RAN/GTSE1/NCBP2/U2AF2/NUP37/NUP107/NUP43/SMG5/NUP210/SLBP/LTV1/RAE1/CSE1L/RANBP3L	14	3.20713
BP	GO:0016925	protein sumoylation	9/494	82/18670	0.000312414	0.00421251	0.00358181	SAE1/GNL3/NUP37/TRIM28/NUP107/NUP43/NUP210/UBA2/RAE1	9	3
BP	GO:0072698	protein localization to microtubule cytoskeleton	7/494	50/18670	0.000324605	0.00436115	0.0037082	TTK/CEP72/SPAG5/AURKA/STIL/HNRNPU/KIF20B	7	2.64575
BP	GO:0051031	tRNA transport	6/494	36/18670	0.00033021	0.00440476	0.00374528	RAN/NUP37/NUP107/NUP43/NUP210/RAE1	6	2.44949
BP	GO:0051973	positive regulation of telomerase activity	6/494	36/18670	0.00033021	0.00440476	0.00374528	AURKB/NEK2/CCT2/MAPKAPK5/TCP1/DKC1	6	2.44949
BP	GO:0002495	antigen processing and presentation of peptide antigen via MHC class II	10/494	101/18670	0.000342872	0.00455739	0.00387505	KIF2C/CENPE/KIF18A/KIF4A/KIF23/KIF15/DYNC1LI1/KIF11/RACGAP1/DYNLL1	10	3.16228
BP	GO:0006352	DNA-templated transcription, initiation	17/494	249/18670	0.000360849	0.00477932	0.00406376	CCNB1/CDK1/MED10/SMARCA4/E2F2/E2F3/TRIM28/SUB1/TBP/CD3EAP/SMARCB1/NR2C2AP/CDK4/NR3C1/KAT2B/RORA/ESR1	17	2.18282
BP	GO:0002504	antigen processing and presentation of peptide or polysaccharide antigen via MHC class II	10/494	102/18670	0.000371331	0.00490078	0.00416703	KIF2C/CENPE/KIF18A/KIF4A/KIF23/KIF15/DYNC1LI1/KIF11/RACGAP1/DYNLL1	10	3.16228
BP	GO:0051298	centrosome duplication	8/494	67/18670	0.000376398	0.00495017	0.00420902	WDR62/CEP72/CCNF/STIL/XRCC3/PLK4/CHORDC1/KAT2B	8	2.12132
BP	GO:0007339	binding of sperm to zona pellucida	6/494	37/18670	0.000385411	0.00503326	0.00427967	CCT5/CCT2/CCT3/CCT8/TCP1/CLGN	6	2.44949
BP	GO:0060236	regulation of mitotic spindle organization	6/494	37/18670	0.000385411	0.00503326	0.00427967	PLK1/TPX2/TACC3/GPSM2/HNRNPU/RAE1	6	2.44949
BP	GO:1903578	regulation of ATP metabolic process	11/494	122/18670	0.000397884	0.00517804	0.00440278	CCNB1/CDK1/BEND3/NUP37/NUP107/NUP43/DNM1L/SLC2A6/NUP210/RAE1/PRKAG1	11	3.31662
BP	GO:0006109	regulation of carbohydrate metabolic process	15/494	206/18670	0.000402233	0.00521646	0.00443544	FOXK1/NUP37/NUP107/NUP43/SLC2A6/NUP210/DUSP12/RAE1/PRKAG1/PDK2/KAT2B/RORA/IRS1/IRS2/PDK4	15	0.774597
BP	GO:0051170	import into nucleus	13/494	163/18670	0.000407561	0.00526727	0.00447865	RAN/KPNA2/ECT2/SNRPD1/PRKCD/TRIM28/NUP107/SNRPB/SNRPF/PIK3R2/CSE1L/PRKAG1/DRD1	13	3.05085
BP	GO:0006301	postreplication repair	7/494	52/18670	0.00041545	0.00535071	0.00454959	RFC4/UBE2N/POLD1/RFC2/DTL/MSH2/RFC5	7	2.64575
BP	GO:0008334	histone mRNA metabolic process	5/494	25/18670	0.000435569	0.00559056	0.00475353	MTPAP/NCBP2/SNRPB/SNRPF/SLBP	5	2.23607
BP	GO:0007623	circadian rhythm	15/494	208/18670	0.000445464	0.00569798	0.00484487	SUV39H2/CDK1/EZH2/SFPQ/HDAC2/TOP2A/MYBBP1A/PPP1CC/HNRNPU/CDK4/TIMELESS/PRKDC/RORA/CRY2/KLF9	15	2.32379
BP	GO:0006298	mismatch repair	6/494	38/18670	0.000447567	0.00570533	0.00485112	EXO1/POLD1/TDG/RNASEH2A/LIG1/MSH2	6	2.44949
BP	GO:0051188	cofactor biosynthetic process	20/494	326/18670	0.000458555	0.00582552	0.00495332	PDSS1/FOXK1/GGCT/NUP37/NUP107/NUP43/MTHFD1L/SLC2A6/HKDC1/NUP210/RAE1/PRKAG1/PDK2/CBR4/CYP1A1/GPHN/GCDH/CYP1A2/MTHFD1/PDK4	20	0.894427
BP	GO:0045840	positive regulation of mitotic nuclear division	7/494	53/18670	0.000467918	0.00592432	0.00503732	UBE2C/AURKA/DLGAP5/CDT1/NUSAP1/CDCA5/HNRNPU	7	2.64575
BP	GO:0051781	positive regulation of cell division	9/494	87/18670	0.000486785	0.00614238	0.00522273	AURKB/CDC6/ECT2/KIF23/KIF14/CDC25B/RACGAP1/KIF20B/CDC14B	9	2.33333
BP	GO:0006367	transcription initiation from RNA polymerase II promoter	14/494	188/18670	0.000496822	0.00624791	0.00531246	CCNB1/CDK1/MED10/E2F2/E2F3/TRIM28/SUB1/TBP/NR2C2AP/CDK4/NR3C1/KAT2B/RORA/ESR1	14	1.60357
BP	GO:2000241	regulation of reproductive process	12/494	146/18670	0.00051402	0.0064425	0.00547792	TRIP13/TTK/CDC20/AURKA/CDC25A/CDC25C/HDAC2/ASPM/FBXO5/CDC25B/FBXO43/ESR1	12	2.88675
BP	GO:0001325	formation of extrachromosomal circular DNA	4/494	15/18670	0.000524038	0.0065026	0.00552902	EXO1/BLM/DNA2/XRCC3	4	2
BP	GO:0090656	t-circle formation	4/494	15/18670	0.000524038	0.0065026	0.00552902	EXO1/BLM/DNA2/XRCC3	4	2
BP	GO:0090737	telomere maintenance via telomere trimming	4/494	15/18670	0.000524038	0.0065026	0.00552902	EXO1/BLM/DNA2/XRCC3	4	2
BP	GO:0001556	oocyte maturation	5/494	26/18670	0.000527649	0.00652572	0.00554868	CCNB1/TRIP13/AURKA/FBXO5/CDC25B	5	2.23607
BP	GO:0071426	ribonucleoprotein complex export from nucleus	11/494	127/18670	0.000560542	0.00690966	0.00587513	RAN/NCBP2/U2AF2/NUP37/NUP107/NUP43/SMG5/NUP210/SLBP/LTV1/RAE1	11	3.31662
BP	GO:0008156	negative regulation of DNA replication	6/494	40/18670	0.000595118	0.00731173	0.00621701	GTPBP4/CDC6/BLM/FBXO5/DONSON/TIMELESS	6	2.44949
BP	GO:0071166	ribonucleoprotein complex localization	11/494	128/18670	0.000598961	0.00733482	0.00623664	RAN/NCBP2/U2AF2/NUP37/NUP107/NUP43/SMG5/NUP210/SLBP/LTV1/RAE1	11	3.31662
BP	GO:0009108	coenzyme biosynthetic process	17/494	261/18670	0.000617379	0.00753565	0.0064074	PDSS1/FOXK1/NUP37/NUP107/NUP43/MTHFD1L/SLC2A6/HKDC1/NUP210/RAE1/PRKAG1/PDK2/CBR4/GPHN/GCDH/MTHFD1/PDK4	17	1.21268
BP	GO:0051447	negative regulation of meiotic cell cycle	4/494	16/18670	0.000684185	0.00832388	0.00707761	TRIP13/TTK/FBXO5/FBXO43	4	2
BP	GO:0015931	nucleobase-containing compound transport	16/494	241/18670	0.000720739	0.00874014	0.00743155	RAN/CPSF6/SFPQ/NCBP2/U2AF2/NUP37/NUP107/NUP43/IGF2BP2/SMG5/NUP210/SLBP/LTV1/HNRNPU/RAE1/SLC25A19	16	4
BP	GO:0045143	homologous chromosome segregation	7/494	57/18670	0.000732924	0.00885913	0.00753273	TRIP13/PLK1/PTTG1/CCNE2/CCNE1/FANCD2/PTTG3P	7	2.64575
BP	GO:0031440	regulation of mRNA 3'-end processing	5/494	28/18670	0.000754749	0.00909351	0.00773202	CCNB1/CPSF6/NCBP2/SNRPA/CPEB3	5	1.34164
BP	GO:0010972	negative regulation of G2/M transition of mitotic cell cycle	9/494	93/18670	0.000794131	0.00953724	0.00810931	AURKB/CDC6/CDK1/AURKA/BLM/RAD21/DONSON/PSMD14/FOXO4	9	2.33333
BP	GO:0006090	pyruvate metabolic process	12/494	154/18670	0.000826914	0.00989912	0.008417	VDAC1/FOXK1/NUP37/NUP107/NUP43/SLC2A6/HKDC1/NUP210/RAE1/PRKAG1/PDK2/PDK4	12	2.3094
BP	GO:0042790	nucleolar large rRNA transcription by RNA polymerase I	4/494	17/18670	0.000876111	0.0104545	0.00888928	SMARCA4/CD3EAP/SMARCB1/NCL	4	2
BP	GO:0010824	regulation of centrosome duplication	6/494	43/18670	0.000884079	0.0104827	0.00891317	CCNF/STIL/XRCC3/PLK4/CHORDC1/KAT2B	6	1.63299
BP	GO:0051293	establishment of spindle localization	6/494	43/18670	0.000884079	0.0104827	0.00891317	CENPA/PLK1/NDC80/MAD2L1/NUSAP1/GPSM2	6	2.44949
BP	GO:0000132	establishment of mitotic spindle orientation	5/494	29/18670	0.000892365	0.0105141	0.00893994	CENPA/PLK1/NDC80/MAD2L1/GPSM2	5	2.23607
BP	GO:0051642	centrosome localization	5/494	29/18670	0.000892365	0.0105141	0.00893994	MAD2L1/AURKA/ASPM/GPSM2/SUN2	5	1.34164
BP	GO:0042752	regulation of circadian rhythm	10/494	114/18670	0.000895873	0.0105223	0.00894687	SUV39H2/CDK1/EZH2/SFPQ/TOP2A/PPP1CC/TIMELESS/PRKDC/RORA/CRY2	10	1.89737
BP	GO:0051196	regulation of coenzyme metabolic process	9/494	95/18670	0.000926155	0.0108439	0.00922029	NUP37/NUP107/NUP43/SLC2A6/NUP210/RAE1/PRKAG1/PDK2/PDK4	9	1.66667
BP	GO:2000779	regulation of double-strand break repair	8/494	77/18670	0.000964947	0.0112627	0.00957646	FOXM1/RAD51AP1/POLQ/RAD51/FANCB/FUS/TIMELESS/PRKDC	8	2.82843
BP	GO:0007292	female gamete generation	11/494	136/18670	0.000992707	0.0115507	0.00982127	CCNB1/TRIP13/TTK/PLK1/AURKA/NCAPH/TOP2A/ASPM/FBXO5/CDC25B/MASTL	11	3.31662
BP	GO:0044818	mitotic G2/M transition checkpoint	5/494	30/18670	0.00104781	0.0121163	0.0103022	CDC6/CDK1/BLM/DONSON/FOXO4	5	1.34164
BP	GO:0061842	microtubule organizing center localization	5/494	30/18670	0.00104781	0.0121163	0.0103022	MAD2L1/AURKA/ASPM/GPSM2/SUN2	5	1.34164
BP	GO:2001022	positive regulation of response to DNA damage stimulus	9/494	97/18670	0.00107546	0.0123976	0.0105415	FOXM1/UBE2N/PRKCD/TRIM28/EEF1E1/FANCB/FUS/TIMELESS/PRKDC	9	3
BP	GO:0016570	histone modification	24/494	454/18670	0.00109338	0.0125654	0.0106841	SUV39H2/CCNB1/AURKB/CDK1/EZH2/BEND3/AURKA/UBE2N/DNMT1/UHRF1/SFPQ/HDAC2/MCRS1/VRK1/PRKCD/PPP5C/PRMT3/PRMT1/YEATS2/ACTL6A/SMARCB1/EED/KAT2B/DRD1	24	4.08248
BP	GO:0051782	negative regulation of cell division	4/494	18/18670	0.00110304	0.0126376	0.0107455	AURKB/BLM/ASPM/E2F8	4	2
BP	GO:0010569	regulation of double-strand break repair via homologous recombination	6/494	45/18670	0.00112972	0.0129037	0.0109718	RAD51AP1/POLQ/RAD51/FANCB/FUS/TIMELESS	6	2.44949
BP	GO:1904951	positive regulation of establishment of protein localization	24/494	456/18670	0.00116049	0.0132147	0.0112362	CCT6A/CCT5/RAN/GTSE1/SAE1/CCT2/ECT2/CCT3/PRKCD/TRIM28/CCT8/TCP1/YWHAZ/AACS/DNM1L/DYNLL1/DKC1/E2F1/PIK3R2/KIF20B/IRS2/SORL1/BCAS3/EXPH5	24	3.26599
BP	GO:0016072	rRNA metabolic process	16/494	253/18670	0.00120503	0.0136802	0.011632	GTPBP4/NOP58/SMARCA4/DHX37/DCAF13/PA2G4/NOP2/RPP38/NOP56/DKC1/CD3EAP/LYAR/DDX49/SMARCB1/NCL/DDX27	16	4
BP	GO:0040020	regulation of meiotic nuclear division	5/494	31/18670	0.00122247	0.0137527	0.0116937	TRIP13/TTK/CDC20/FBXO5/FBXO43	5	2.23607
BP	GO:0050685	positive regulation of mRNA processing	5/494	31/18670	0.00122247	0.0137527	0.0116937	CCNB1/NCBP2/SF3B4/DAZAP1/CPEB3	5	1.34164
BP	GO:2000781	positive regulation of double-strand break repair	5/494	31/18670	0.00122247	0.0137527	0.0116937	FOXM1/FANCB/FUS/TIMELESS/PRKDC	5	2.23607
BP	GO:0006342	chromatin silencing	10/494	120/18670	0.00132805	0.0148957	0.0126655	EZH2/BEND3/PPHLN1/DNMT1/HDAC2/CDC45/TRIM28/HELLS/ATAD2/EED	10	3.16228
BP	GO:0000018	regulation of DNA recombination	9/494	101/18670	0.00143248	0.0160189	0.0136205	KPNA2/BLM/RAD51AP1/POLQ/RAD51/FANCB/FUS/MSH2/TIMELESS	9	3
BP	GO:0006282	regulation of DNA repair	10/494	122/18670	0.00150505	0.0167802	0.0142678	FOXM1/UBE2N/RAD51AP1/POLQ/RAD51/TRIM28/FANCB/FUS/TIMELESS/PRKDC	10	3.16228
BP	GO:0031647	regulation of protein stability	17/494	284/18670	0.00155863	0.0173259	0.0147318	CCT6A/GTPBP4/CCT5/PLK1/GTSE1/AURKA/CCT2/CCT3/PRKCD/CCT8/TCP1/ZNF207/PRKDC/SAV1/DSG1/GPIHBP1/CREBL2	17	2.18282
BP	GO:0045739	positive regulation of DNA repair	7/494	65/18670	0.00161027	0.0178468	0.0151747	FOXM1/UBE2N/TRIM28/FANCB/FUS/TIMELESS/PRKDC	7	2.64575
BP	GO:0007095	mitotic G2 DNA damage checkpoint	4/494	20/18670	0.00167481	0.0185072	0.0157363	CDK1/BLM/DONSON/FOXO4	4	1
BP	GO:0046822	regulation of nucleocytoplasmic transport	9/494	104/18670	0.00175828	0.019346	0.0164494	RAN/GTSE1/CPSF6/ECT2/NCBP2/PRKCD/TRIM28/PIK3R2/PPP1CC	9	3
BP	GO:0051785	positive regulation of nuclear division	7/494	66/18670	0.00176108	0.019346	0.0164494	UBE2C/AURKA/DLGAP5/CDT1/NUSAP1/CDCA5/HNRNPU	7	2.64575
BP	GO:0032388	positive regulation of intracellular transport	14/494	215/18670	0.00181986	0.019933	0.0169486	RAN/GTSE1/CPSF6/SAE1/SPAG5/ECT2/NCBP2/PRKCD/TRIM28/DNM1L/PIK3R2/KIF20B/SORL1/BCAS3	14	2.67261
BP	GO:0010212	response to ionizing radiation	11/494	147/18670	0.00186203	0.0203354	0.0172907	BAK1/BLM/ECT2/RAD51AP1/RAD51/FANCD2/XRCC2/MSH2/RAD54L/PRKDC/RHOB	11	2.7136
BP	GO:0007135	meiosis II	3/494	10/18670	0.00192321	0.0207008	0.0176014	BUB1B/BUB1/MASTL	3	1.73205
BP	GO:0045876	positive regulation of sister chromatid cohesion	3/494	10/18670	0.00192321	0.0207008	0.0176014	SFPQ/RAD21/FEN1	3	1.73205
BP	GO:0061983	meiosis II cell cycle process	3/494	10/18670	0.00192321	0.0207008	0.0176014	BUB1B/BUB1/MASTL	3	1.73205
BP	GO:0090309	positive regulation of methylation-dependent chromatin silencing	3/494	10/18670	0.00192321	0.0207008	0.0176014	PPHLN1/DNMT1/TRIM28	3	1.73205
BP	GO:1901838	positive regulation of transcription of nucleolar large rRNA by RNA polymerase I	3/494	10/18670	0.00192321	0.0207008	0.0176014	SMARCA4/SMARCB1/NCL	3	1.73205
BP	GO:0009199	ribonucleoside triphosphate metabolic process	19/494	341/18670	0.00194462	0.0208711	0.0177462	RAN/CCNB1/OLA1/CDK1/BEND3/UCK2/FOXK1/NUP37/NUP107/NUP43/DNM1L/SLC2A6/UQCRHL/HKDC1/NUP210/RAE1/MSH2/PRKAG1/GPHN	19	3.90007
BP	GO:0042593	glucose homeostasis	15/494	241/18670	0.00197894	0.021068	0.0179137	FOXK1/SMARCA4/CDK16/AACS/NCOA5/DYNLL1/HKDC1/PIK3R2/SMARCB1/PDK2/FOXO4/IRS1/IRS2/CRY2/PDK4	15	0.774597
BP	GO:0006890	retrograde vesicle-mediated transport, Golgi to ER	8/494	86/18670	0.00197989	0.021068	0.0179137	KIF2C/CENPE/KIF18A/KIF4A/KIF23/KIF15/KIF11/RACGAP1	8	2.82843
BP	GO:0070542	response to fatty acid	8/494	86/18670	0.00197989	0.021068	0.0179137	CCNB1/SMARCD1/PPP5C/AACS/E2F1/CDK4/IRS1/PDK4	8	1.41421
BP	GO:0009314	response to radiation	23/494	448/18670	0.00200719	0.0212978	0.0181091	BAK1/AURKB/BLM/CDC25A/POLD1/ECT2/UNC119/RAD51AP1/PBK/RAD51/FANCD2/XRCC2/DTL/FEN1/FANCG/METAP2/PPP1CC/MSH2/RAD54L/PRKDC/RHOB/CRY2/DRD1	23	3.54475
BP	GO:0055093	response to hyperoxia	4/494	21/18670	0.00202605	0.0214371	0.0182275	HDAC2/CDK4/CYP1A1/FAS	4	0
BP	GO:0033500	carbohydrate homeostasis	15/494	242/18670	0.00205992	0.0217339	0.0184798	FOXK1/SMARCA4/CDK16/AACS/NCOA5/DYNLL1/HKDC1/PIK3R2/SMARCB1/PDK2/FOXO4/IRS1/IRS2/CRY2/PDK4	15	0.774597
BP	GO:0006369	termination of RNA polymerase II transcription	5/494	35/18670	0.00214158	0.0224686	0.0191045	NCBP2/SNRPB/SNRPF/SLBP/TTF2	5	2.23607
BP	GO:0051294	establishment of spindle orientation	5/494	35/18670	0.00214158	0.0224686	0.0191045	CENPA/PLK1/NDC80/MAD2L1/GPSM2	5	2.23607
BP	GO:0006401	RNA catabolic process	21/494	397/18670	0.00217171	0.0227208	0.019319	MTPAP/POP1/DHX34/NCBP2/HNRNPC/PRKCD/YWHAZ/RNASEH2A/PSMD14/DNA2/IGF2BP2/DKC1/FEN1/HNRNPM/E2F1/SMG5/FASTKD3/HNRNPU/RBM38/CNOT6/CPEB3	21	4.14614
BP	GO:0048146	positive regulation of fibroblast proliferation	6/494	51/18670	0.00218624	0.0228089	0.0193939	CCNB1/CDC6/E2F1/CDK4/PRKDC/ESR1	6	1.63299
BP	GO:0006998	nuclear envelope organization	6/494	52/18670	0.00241721	0.0251484	0.0213831	CCNB1/PLK1/CDK1/CCNB2/VRK1/SUN2	6	1.63299
BP	GO:0009123	nucleoside monophosphate metabolic process	20/494	375/18670	0.00249365	0.0258116	0.0219471	CCNB1/OLA1/CDK1/BEND3/UCK2/FOXK1/NUP37/NUP107/NUP43/DNM1L/SLC2A6/GMPS/UQCRHL/HKDC1/NUP210/RAE1/MSH2/ADSL/PRKAG1/TK2	20	4.02492
BP	GO:0042254	ribosome biogenesis	17/494	297/18670	0.00249478	0.0258116	0.0219471	GTPBP4/RAN/BRIX1/NOP58/DHX37/DCAF13/PA2G4/PAK1IP1/NOP2/RPP38/NOP56/DKC1/LYAR/MYBBP1A/DDX49/LTV1/DDX27	17	4.12311
BP	GO:0009113	purine nucleobase biosynthetic process	3/494	11/18670	0.00259272	0.0266039	0.0226207	MTHFD1L/GMPS/MTHFD1	3	0.57735
BP	GO:0031442	positive regulation of mRNA 3'-end processing	3/494	11/18670	0.00259272	0.0266039	0.0226207	CCNB1/NCBP2/CPEB3	3	0.57735
BP	GO:0090657	telomeric loop disassembly	3/494	11/18670	0.00259272	0.0266039	0.0226207	RECQL4/BLM/XRCC3	3	1.73205
BP	GO:0035036	sperm-egg recognition	6/494	53/18670	0.00266606	0.0272814	0.0231968	CCT5/CCT2/CCT3/CCT8/TCP1/CLGN	6	2.44949
BP	GO:0006406	mRNA export from nucleus	9/494	111/18670	0.00275104	0.0277984	0.0236364	NCBP2/U2AF2/NUP37/NUP107/NUP43/SMG5/NUP210/SLBP/RAE1	9	3
BP	GO:0071427	mRNA-containing ribonucleoprotein complex export from nucleus	9/494	111/18670	0.00275104	0.0277984	0.0236364	NCBP2/U2AF2/NUP37/NUP107/NUP43/SMG5/NUP210/SLBP/RAE1	9	3
BP	GO:0007099	centriole replication	5/494	37/18670	0.00275379	0.0277984	0.0236364	WDR62/CEP72/STIL/PLK4/KAT2B	5	1.34164
BP	GO:0031935	regulation of chromatin silencing	5/494	37/18670	0.00275379	0.0277984	0.0236364	PPHLN1/DNMT1/CDC45/TRIM28/ATAD2	5	2.23607
BP	GO:0042307	positive regulation of protein import into nucleus	5/494	37/18670	0.00275379	0.0277984	0.0236364	RAN/ECT2/PRKCD/TRIM28/PIK3R2	5	2.23607
BP	GO:0060968	regulation of gene silencing	11/494	155/18670	0.00282163	0.0284065	0.0241534	PPHLN1/DNMT1/CDC45/NUP37/TRIM28/NUP107/NUP43/NUP210/ATAD2/RAE1/ESR1	11	2.7136
BP	GO:0009161	ribonucleoside monophosphate metabolic process	19/494	354/18670	0.00294918	0.0296108	0.0251774	CCNB1/OLA1/CDK1/BEND3/UCK2/FOXK1/NUP37/NUP107/NUP43/DNM1L/SLC2A6/GMPS/UQCRHL/HKDC1/NUP210/RAE1/MSH2/ADSL/PRKAG1	19	4.3589
BP	GO:0006457	protein folding	14/494	227/18670	0.00299532	0.0299934	0.0255027	HSPA14/CCT6A/CCT5/CCT2/GNAZ/CCT3/PDCL3/CCT8/TCP1/CLGN/CHORDC1/PFDN4/DNAJC5/PDRG1	14	3.74166
BP	GO:0030705	cytoskeleton-dependent intracellular transport	12/494	180/18670	0.00310551	0.0310135	0.0263701	TUBA1C/TUBA1B/TMEM201/KIF4A/KIF23/SFPQ/DYNLL1/MYO19/IFT52/WASF1/HNRNPU/SUN2	12	2.88675
BP	GO:0009988	cell-cell recognition	7/494	73/18670	0.00314637	0.0313378	0.0266459	CCT5/CCT2/CCT3/CCT8/TCP1/CLGN/ST6GALNAC6	7	1.88982
BP	GO:1903322	positive regulation of protein modification by small protein conjugation or removal	10/494	135/18670	0.00317727	0.0315614	0.026836	PLK1/UBE2C/CDC20/UBE2N/UBE2S/GNL3/MASTL/FANCI/ADRB2/CDC14B	10	1.89737
BP	GO:0043467	regulation of generation of precursor metabolites and energy	11/494	158/18670	0.00327072	0.0324035	0.027552	CCNB1/CDK1/NUP37/NUP107/NUP43/SLC2A6/NUP210/RAE1/PRKAG1/IRS1/IRS2	11	2.11058
BP	GO:0045814	negative regulation of gene expression, epigenetic	10/494	136/18670	0.00335064	0.0331076	0.0281506	EZH2/BEND3/PPHLN1/DNMT1/HDAC2/CDC45/TRIM28/HELLS/ATAD2/EED	10	3.16228
BP	GO:0002024	diet induced thermogenesis	3/494	12/18670	0.00338949	0.0333151	0.0283271	ADRB1/ADRB2/SORL1	3	-1.73205
BP	GO:0072697	protein localization to cell cortex	3/494	12/18670	0.00338949	0.0333151	0.0283271	PLK1/ANLN/GPSM2	3	1.73205
BP	GO:0042769	DNA damage response, detection of DNA damage	5/494	39/18670	0.0034835	0.0339578	0.0288736	RFC4/POLD1/RFC2/DTL/RFC5	5	2.23607
BP	GO:1901998	toxin transport	5/494	39/18670	0.0034835	0.0339578	0.0288736	CCT5/CCT2/CCT3/CCT8/TCP1	5	2.23607
BP	GO:1904591	positive regulation of protein import	5/494	39/18670	0.0034835	0.0339578	0.0288736	RAN/ECT2/PRKCD/TRIM28/PIK3R2	5	2.23607
BP	GO:0006096	glycolytic process	9/494	115/18670	0.00349124	0.0339578	0.0288736	FOXK1/NUP37/NUP107/NUP43/SLC2A6/HKDC1/NUP210/RAE1/PRKAG1	9	3
BP	GO:0043487	regulation of RNA stability	12/494	183/18670	0.0035509	0.0344483	0.0292907	HNRNPC/PRKCD/YWHAZ/PSMD14/IGF2BP2/DKC1/HNRNPM/E2F1/FASTKD3/HNRNPU/RBM38/CPEB3	12	2.88675
BP	GO:0006353	DNA-templated transcription, termination	7/494	75/18670	0.00366412	0.0354546	0.0301463	NCBP2/SNRPB/SNRPF/TBP/CD3EAP/SLBP/TTF2	7	2.64575
BP	GO:0006757	ATP generation from ADP	9/494	116/18670	0.00369871	0.0356612	0.030322	FOXK1/NUP37/NUP107/NUP43/SLC2A6/HKDC1/NUP210/RAE1/PRKAG1	9	3
BP	GO:0009205	purine ribonucleoside triphosphate metabolic process	18/494	335/18670	0.00371061	0.0356612	0.030322	RAN/CCNB1/OLA1/CDK1/BEND3/FOXK1/NUP37/NUP107/NUP43/DNM1L/SLC2A6/UQCRHL/HKDC1/NUP210/RAE1/MSH2/PRKAG1/GPHN	18	3.77124
BP	GO:0009124	nucleoside monophosphate biosynthetic process	13/494	208/18670	0.00371412	0.0356612	0.030322	UCK2/FOXK1/NUP37/NUP107/NUP43/SLC2A6/GMPS/HKDC1/NUP210/RAE1/ADSL/PRKAG1/TK2	13	3.05085
BP	GO:0009141	nucleoside triphosphate metabolic process	19/494	362/18670	0.00376017	0.0360108	0.0306192	RAN/CCNB1/OLA1/CDK1/BEND3/UCK2/FOXK1/NUP37/NUP107/NUP43/DNM1L/SLC2A6/UQCRHL/HKDC1/NUP210/RAE1/MSH2/PRKAG1/GPHN	19	3.90007
BP	GO:0071398	cellular response to fatty acid	6/494	57/18670	0.0038572	0.0368456	0.031329	CCNB1/SMARCD1/E2F1/CDK4/IRS1/PDK4	6	0.816497
BP	GO:0098534	centriole assembly	5/494	40/18670	0.00389613	0.0369323	0.0314027	WDR62/CEP72/STIL/PLK4/KAT2B	5	1.34164
BP	GO:0098760	response to interleukin-7	5/494	40/18670	0.00389613	0.0369323	0.0314027	STIP1/SMARCA4/STAT5B/IRS1/IRS2	5	-0.447214
BP	GO:0098761	cellular response to interleukin-7	5/494	40/18670	0.00389613	0.0369323	0.0314027	STIP1/SMARCA4/STAT5B/IRS1/IRS2	5	-0.447214
BP	GO:0031398	positive regulation of protein ubiquitination	9/494	117/18670	0.00391571	0.0369323	0.0314027	PLK1/UBE2C/CDC20/UBE2N/UBE2S/MASTL/FANCI/ADRB2/CDC14B	9	1.66667
BP	GO:1900371	regulation of purine nucleotide biosynthetic process	9/494	117/18670	0.00391571	0.0369323	0.0314027	NUP37/NUP107/NUP43/SLC2A6/NUP210/RAE1/PRKAG1/PDK2/PDK4	9	1.66667
BP	GO:0051307	meiotic chromosome separation	4/494	25/18670	0.00393929	0.036968	0.0314331	TTK/NCAPH/TOP2A/EME1	4	2
BP	GO:2000104	negative regulation of DNA-dependent DNA replication	4/494	25/18670	0.00393929	0.036968	0.0314331	BLM/FBXO5/DONSON/TIMELESS	4	2
BP	GO:0030808	regulation of nucleotide biosynthetic process	9/494	118/18670	0.00414256	0.0387781	0.0329722	NUP37/NUP107/NUP43/SLC2A6/NUP210/RAE1/PRKAG1/PDK2/PDK4	9	1.66667
BP	GO:0072522	purine-containing compound biosynthetic process	17/494	313/18670	0.00424959	0.0396806	0.0337395	FOXK1/NUP37/NUP107/NUP43/MTHFD1L/SLC2A6/GMPS/HKDC1/NUP210/RAE1/ADSL/PRKAG1/PDK2/CBR4/GCDH/MTHFD1/PDK4	17	1.69775
BP	GO:0090308	regulation of methylation-dependent chromatin silencing	3/494	13/18670	0.00432044	0.0400481	0.0340521	PPHLN1/DNMT1/TRIM28	3	1.73205
BP	GO:1901836	regulation of transcription of nucleolar large rRNA by RNA polymerase I	3/494	13/18670	0.00432044	0.0400481	0.0340521	SMARCA4/SMARCB1/NCL	3	1.73205
BP	GO:0009167	purine ribonucleoside monophosphate metabolic process	18/494	340/18670	0.00432634	0.0400481	0.0340521	CCNB1/OLA1/CDK1/BEND3/FOXK1/NUP37/NUP107/NUP43/DNM1L/SLC2A6/GMPS/UQCRHL/HKDC1/NUP210/RAE1/MSH2/ADSL/PRKAG1	18	4.24264
BP	GO:0008286	insulin receptor signaling pathway	10/494	141/18670	0.00433357	0.0400481	0.0340521	PRKCD/NCOA5/PIK3R2/CDK4/PDK2/FOXO4/IRS1/IRS2/SORL1/PDK4	10	-0.632456
BP	GO:0019985	translesion synthesis	5/494	41/18670	0.00434257	0.0400481	0.0340521	RFC4/POLD1/RFC2/DTL/RFC5	5	2.23607
BP	GO:0042866	pyruvate biosynthetic process	9/494	119/18670	0.00437954	0.0401906	0.0341732	FOXK1/NUP37/NUP107/NUP43/SLC2A6/HKDC1/NUP210/RAE1/PRKAG1	9	3
BP	GO:0051193	regulation of cofactor metabolic process	9/494	119/18670	0.00437954	0.0401906	0.0341732	NUP37/NUP107/NUP43/SLC2A6/NUP210/RAE1/PRKAG1/PDK2/PDK4	9	1.66667
BP	GO:0009126	purine nucleoside monophosphate metabolic process	18/494	341/18670	0.00445907	0.0407774	0.0346721	CCNB1/OLA1/CDK1/BEND3/FOXK1/NUP37/NUP107/NUP43/DNM1L/SLC2A6/GMPS/UQCRHL/HKDC1/NUP210/RAE1/MSH2/ADSL/PRKAG1	18	4.24264
BP	GO:0031124	mRNA 3'-end processing	8/494	98/18670	0.00446532	0.0407774	0.0346721	CCNB1/CPSF6/MTPAP/NCBP2/U2AF2/SLBP/SNRPA/CPEB3	8	2.12132
BP	GO:0006346	methylation-dependent chromatin silencing	4/494	26/18670	0.00455959	0.0415367	0.0353178	PPHLN1/DNMT1/TRIM28/HELLS	4	2
BP	GO:1902369	negative regulation of RNA catabolic process	6/494	59/18670	0.00458233	0.0416423	0.0354076	DHX34/HNRNPC/DKC1/E2F1/HNRNPU/RBM38	6	2.44949
BP	GO:0009144	purine nucleoside triphosphate metabolic process	18/494	342/18670	0.00459513	0.0416573	0.0354203	RAN/CCNB1/OLA1/CDK1/BEND3/FOXK1/NUP37/NUP107/NUP43/DNM1L/SLC2A6/UQCRHL/HKDC1/NUP210/RAE1/MSH2/PRKAG1/GPHN	18	3.77124
BP	GO:2001020	regulation of response to DNA damage stimulus	13/494	214/18670	0.00471637	0.0425932	0.036216	FOXM1/UBE2N/RAD51AP1/POLQ/RAD51/PRKCD/FBXO5/TRIM28/EEF1E1/FANCB/FUS/TIMELESS/PRKDC	13	3.60555
BP	GO:0018205	peptidyl-lysine modification	20/494	397/18670	0.00472117	0.0425932	0.036216	SUV39H2/EZH2/SAE1/BEND3/DNMT1/HDAC2/MCRS1/GNL3/NUP37/TRIM28/NUP107/NUP43/YEATS2/ACTL6A/NUP210/UBA2/SMARCB1/EED/RAE1/KAT2B	20	4.02492
BP	GO:0006110	regulation of glycolytic process	7/494	79/18670	0.00489118	0.0440206	0.0374297	NUP37/NUP107/NUP43/SLC2A6/NUP210/RAE1/PRKAG1	7	2.64575
BP	GO:1902808	positive regulation of cell cycle G1/S phase transition	6/494	60/18670	0.00498034	0.0447153	0.0380204	CDC6/EZH2/MTBP/CCNE1/CDC45/CYP1A1	6	1.63299
BP	GO:0071478	cellular response to radiation	12/494	191/18670	0.00499457	0.0447356	0.0380377	BAK1/AURKB/BLM/CDC25A/POLD1/ECT2/RAD51AP1/PBK/RAD51/METAP2/RHOB/CRY2	12	2.3094
BP	GO:0009260	ribonucleotide biosynthetic process	16/494	293/18670	0.00518131	0.0462971	0.0393654	UCK2/FOXK1/NUP37/NUP107/NUP43/SLC2A6/GMPS/HKDC1/NUP210/RAE1/ADSL/PRKAG1/PDK2/CBR4/GCDH/PDK4	16	2
BP	GO:0090169	regulation of spindle assembly	4/494	27/18670	0.00524237	0.0467309	0.0397343	PLK1/SPAG5/GPSM2/HNRNPU	4	2
BP	GO:0030866	cortical actin cytoskeleton organization	5/494	43/18670	0.00534274	0.0472724	0.0401947	ECT2/KIF23/ANLN/TIGD5/RACGAP1	5	2.23607
BP	GO:0007100	mitotic centrosome separation	3/494	14/18670	0.00539171	0.0472724	0.0401947	NEK2/AURKA/KIF11	3	1.73205
BP	GO:0031937	positive regulation of chromatin silencing	3/494	14/18670	0.00539171	0.0472724	0.0401947	PPHLN1/DNMT1/TRIM28	3	1.73205
BP	GO:0046606	negative regulation of centrosome cycle	3/494	14/18670	0.00539171	0.0472724	0.0401947	NEK2/CCNF/KAT2B	3	0.57735
BP	GO:0048308	organelle inheritance	3/494	14/18670	0.00539171	0.0472724	0.0401947	CDK1/VRK1/YWHAZ	3	1.73205
BP	GO:0048313	Golgi inheritance	3/494	14/18670	0.00539171	0.0472724	0.0401947	CDK1/VRK1/YWHAZ	3	1.73205
BP	GO:0072425	signal transduction involved in G2 DNA damage checkpoint	3/494	14/18670	0.00539171	0.0472724	0.0401947	PLK1/DTL/CDC14B	3	0.57735
BP	GO:0062012	regulation of small molecule metabolic process	22/494	459/18670	0.00560055	0.0489537	0.0416243	RAN/CCNB1/CDK1/BEND3/FOXK1/NUP37/NUP107/NUP43/DNM1L/PSMD14/SLC2A6/ODC1/NUP210/DUSP12/RAE1/PRKAG1/PDK2/KAT2B/RORA/IRS1/IRS2/PDK4	22	2.13201
BP	GO:0030811	regulation of nucleotide catabolic process	7/494	81/18670	0.00560969	0.0489537	0.0416243	NUP37/NUP107/NUP43/SLC2A6/NUP210/RAE1/PRKAG1	7	2.64575
BP	GO:0032922	circadian regulation of gene expression	6/494	62/18670	0.00585162	0.0509459	0.0433182	HDAC2/MYBBP1A/PPP1CC/HNRNPU/RORA/CRY2	6	0.816497
BP	GO:0036296	response to increased oxygen levels	4/494	28/18670	0.0059903	0.0520321	0.0442417	HDAC2/CDK4/CYP1A1/FAS	4	0
BP	GO:0018105	peptidyl-serine phosphorylation	16/494	299/18670	0.00626374	0.0542809	0.0461538	CCNB1/TTK/PLK1/BAK1/AURKB/CDK1/AURKA/MAPKAPK5/VRK1/PRKCD/CDC7/MASTL/IKBKE/PRKDC/CREBL2/DRD1	16	3
BP	GO:0045815	positive regulation of gene expression, epigenetic	6/494	63/18670	0.00632664	0.0546991	0.0465094	SMARCD1/TBP/CD3EAP/MYBBP1A/ATAD2/KAT2B	6	1.63299
BP	GO:0046031	ADP metabolic process	9/494	126/18670	0.00634788	0.0547138	0.046522	FOXK1/NUP37/NUP107/NUP43/SLC2A6/HKDC1/NUP210/RAE1/PRKAG1	9	3
BP	GO:0009156	ribonucleoside monophosphate biosynthetic process	12/494	197/18670	0.00635764	0.0547138	0.046522	UCK2/FOXK1/NUP37/NUP107/NUP43/SLC2A6/GMPS/HKDC1/NUP210/RAE1/ADSL/PRKAG1	12	3.4641
BP	GO:0006164	purine nucleotide biosynthetic process	16/494	300/18670	0.00646073	0.0553459	0.0470594	FOXK1/NUP37/NUP107/NUP43/SLC2A6/GMPS/HKDC1/NUP210/RAE1/ADSL/PRKAG1/PDK2/CBR4/GCDH/MTHFD1/PDK4	16	1.5
BP	GO:0046390	ribose phosphate biosynthetic process	16/494	300/18670	0.00646073	0.0553459	0.0470594	UCK2/FOXK1/NUP37/NUP107/NUP43/SLC2A6/GMPS/HKDC1/NUP210/RAE1/ADSL/PRKAG1/PDK2/CBR4/GCDH/PDK4	16	2
BP	GO:0042754	negative regulation of circadian rhythm	3/494	15/18670	0.00660863	0.056226	0.0478078	SUV39H2/SFPQ/CRY2	3	0.57735
BP	GO:0042921	glucocorticoid receptor signaling pathway	3/494	15/18670	0.00660863	0.056226	0.0478078	PPP5C/NR3C1/CRY2	3	-0.57735
BP	GO:0051299	centrosome separation	3/494	15/18670	0.00660863	0.056226	0.0478078	NEK2/AURKA/KIF11	3	1.73205
BP	GO:0031123	RNA 3'-end processing	10/494	150/18670	0.00666319	0.0565614	0.0480929	CCNB1/CPSF6/MTPAP/NCBP2/U2AF2/INTS8/DKC1/SLBP/SNRPA/CPEB3	10	2.52982
BP	GO:0017038	protein import	12/494	199/18670	0.00687216	0.0580713	0.0493768	RAN/KPNA2/ECT2/TOMM40/PRKCD/TRIM28/NUP107/TIMM44/PIK3R2/CSE1L/GPIHBP1/DRD1	12	2.3094
BP	GO:0061013	regulation of mRNA catabolic process	12/494	199/18670	0.00687216	0.0580713	0.0493768	DHX34/HNRNPC/PRKCD/YWHAZ/PSMD14/IGF2BP2/HNRNPM/E2F1/FASTKD3/HNRNPU/RBM38/CPEB3	12	2.88675
BP	GO:0034470	ncRNA processing	19/494	384/18670	0.00698875	0.0589232	0.0501011	GTPBP4/SEPHS1/NOP58/POP1/SRRT/DHX37/DCAF13/PUS1/PA2G4/NOP2/RPP38/INTS8/NOP56/DKC1/WDR4/LYAR/DDX49/DDX27/FTSJ1	19	4.3589
BP	GO:0002478	antigen processing and presentation of exogenous peptide antigen	11/494	175/18670	0.00701073	0.0589754	0.0501455	KIF2C/CENPE/KIF18A/KIF4A/KIF23/KIF15/DYNC1LI1/KIF11/PSMD14/RACGAP1/DYNLL1	11	3.31662
BP	GO:0022412	cellular process involved in reproduction in multicellular organism	18/494	357/18670	0.00708023	0.0594262	0.0505288	CCNB1/TRIP13/TTK/PLK1/AURKA/KIF18A/NCAPH/TOP2A/ASPM/DAZAP1/FBXO5/CDC25B/MASTL/DYNLL1/FANCG/MSH2/SRPK1/FZD4	18	3.77124
BP	GO:0048599	oocyte development	5/494	46/18670	0.00713274	0.0597327	0.0507895	CCNB1/TRIP13/AURKA/FBXO5/CDC25B	5	2.23607
BP	GO:0051028	mRNA transport	10/494	152/18670	0.00729287	0.060937	0.0518134	NCBP2/U2AF2/NUP37/NUP107/NUP43/IGF2BP2/SMG5/NUP210/SLBP/RAE1	10	3.16228
BP	GO:0009165	nucleotide biosynthetic process	19/494	386/18670	0.00736951	0.0613093	0.05213	UCK2/FOXK1/RRM2/NUP37/NUP107/NUP43/SLC2A6/GMPS/HKDC1/NUP210/RAE1/ADSL/PRKAG1/PDK2/CBR4/GCDH/MTHFD1/TK2/PDK4	19	1.60591
BP	GO:0034404	nucleobase-containing small molecule biosynthetic process	13/494	226/18670	0.00737025	0.0613093	0.05213	UCK2/FOXK1/TDG/NUP37/NUP107/NUP43/SLC2A6/GMPS/HKDC1/NUP210/RAE1/PRKAG1/TK2	13	3.05085
BP	GO:0046034	ATP metabolic process	16/494	305/18670	0.00752206	0.0624268	0.0530802	CCNB1/OLA1/CDK1/BEND3/FOXK1/NUP37/NUP107/NUP43/DNM1L/SLC2A6/UQCRHL/HKDC1/NUP210/RAE1/MSH2/PRKAG1	16	4
BP	GO:0098781	ncRNA transcription	8/494	107/18670	0.00753802	0.0624268	0.0530802	SMARCA4/NCBP2/SRRT/INTS8/TBP/CD3EAP/SMARCB1/NCL	8	2.82843
BP	GO:0043488	regulation of mRNA stability	11/494	177/18670	0.00761068	0.062864	0.0534519	HNRNPC/PRKCD/YWHAZ/PSMD14/IGF2BP2/HNRNPM/E2F1/FASTKD3/HNRNPU/RBM38/CPEB3	11	2.7136
BP	GO:0090316	positive regulation of intracellular protein transport	10/494	153/18670	0.00762447	0.062864	0.0534519	RAN/GTSE1/SAE1/ECT2/PRKCD/TRIM28/PIK3R2/KIF20B/SORL1/BCAS3	10	1.89737
BP	GO:0038111	interleukin-7-mediated signaling pathway	4/494	30/18670	0.00769185	0.0631408	0.0536872	SMARCA4/STAT5B/IRS1/IRS2	4	-1
BP	GO:0070979	protein K11-linked ubiquitination	4/494	30/18670	0.00769185	0.0631408	0.0536872	UBE2C/ANAPC7/UBE2S/UBE2T	4	2
BP	GO:0009152	purine ribonucleotide biosynthetic process	15/494	280/18670	0.00789963	0.0647042	0.0550166	FOXK1/NUP37/NUP107/NUP43/SLC2A6/GMPS/HKDC1/NUP210/RAE1/ADSL/PRKAG1/PDK2/CBR4/GCDH/PDK4	15	1.80739
BP	GO:0031958	corticosteroid receptor signaling pathway	3/494	16/18670	0.0079758	0.0650429	0.0553045	PPP5C/NR3C1/CRY2	3	-0.57735
BP	GO:0036124	histone H3-K9 trimethylation	3/494	16/18670	0.0079758	0.0650429	0.0553045	SUV39H2/BEND3/SMARCB1	3	1.73205
BP	GO:1901293	nucleoside phosphate biosynthetic process	19/494	390/18670	0.00818156	0.0665754	0.0566077	UCK2/FOXK1/RRM2/NUP37/NUP107/NUP43/SLC2A6/GMPS/HKDC1/NUP210/RAE1/ADSL/PRKAG1/PDK2/CBR4/GCDH/MTHFD1/TK2/PDK4	19	1.60591
BP	GO:0043161	proteasome-mediated ubiquitin-dependent protein catabolic process	20/494	419/18670	0.00838904	0.0681153	0.057917	CCNB1/PLK1/UBE2C/AURKB/CDK1/BUB1B/MAD2L1/CDC20/RNF34/ANAPC7/AURKA/CCNF/UBE2S/PTTG1/PBK/KIF14/FBXO5/PSMD14/FBXO33/FBXO31	20	3.57771
BP	GO:0030865	cortical cytoskeleton organization	5/494	48/18670	0.00853556	0.069005	0.0586734	ECT2/KIF23/ANLN/TIGD5/RACGAP1	5	2.23607
BP	GO:0061647	histone H3-K9 modification	5/494	48/18670	0.00853556	0.069005	0.0586734	SUV39H2/BEND3/DNMT1/SMARCB1/KAT2B	5	1.34164
BP	GO:0071539	protein localization to centrosome	4/494	31/18670	0.00865027	0.0697814	0.0593336	CEP72/SPAG5/AURKA/STIL	4	2
BP	GO:0043470	regulation of carbohydrate catabolic process	7/494	88/18670	0.00875554	0.0704783	0.0599262	NUP37/NUP107/NUP43/SLC2A6/NUP210/RAE1/PRKAG1	7	2.64575
BP	GO:0019884	antigen processing and presentation of exogenous antigen	11/494	182/18670	0.00928593	0.074587	0.0634197	KIF2C/CENPE/KIF18A/KIF4A/KIF23/KIF15/DYNC1LI1/KIF11/PSMD14/RACGAP1/DYNLL1	11	3.31662
BP	GO:0006165	nucleoside diphosphate phosphorylation	9/494	134/18670	0.00936143	0.075032	0.0637981	FOXK1/NUP37/NUP107/NUP43/SLC2A6/HKDC1/NUP210/RAE1/PRKAG1	9	3
BP	GO:0006266	DNA ligation	3/494	17/18670	0.00949717	0.0751524	0.0639004	TOP2A/RAD51/LIG1	3	1.73205
BP	GO:0009070	serine family amino acid biosynthetic process	3/494	17/18670	0.00949717	0.0751524	0.0639004	SEPHS1/PSPH/MTHFD1	3	0.57735
BP	GO:0033262	regulation of nuclear cell cycle DNA replication	3/494	17/18670	0.00949717	0.0751524	0.0639004	DBF4/CDT1/CDC7	3	1.73205
BP	GO:0062033	positive regulation of mitotic sister chromatid segregation	3/494	17/18670	0.00949717	0.0751524	0.0639004	DLGAP5/CDT1/HNRNPU	3	1.73205
BP	GO:1900363	regulation of mRNA polyadenylation	3/494	17/18670	0.00949717	0.0751524	0.0639004	CPSF6/SNRPA/CPEB3	3	0.57735
BP	GO:1904355	positive regulation of telomere capping	3/494	17/18670	0.00949717	0.0751524	0.0639004	AURKB/NEK2/MAPKAPK5	3	1.73205
BP	GO:0009127	purine nucleoside monophosphate biosynthetic process	11/494	183/18670	0.00965271	0.0759829	0.0646066	FOXK1/NUP37/NUP107/NUP43/SLC2A6/GMPS/HKDC1/NUP210/RAE1/ADSL/PRKAG1	11	3.31662
BP	GO:0009168	purine ribonucleoside monophosphate biosynthetic process	11/494	183/18670	0.00965271	0.0759829	0.0646066	FOXK1/NUP37/NUP107/NUP43/SLC2A6/GMPS/HKDC1/NUP210/RAE1/ADSL/PRKAG1	11	3.31662
BP	GO:0031297	replication fork processing	4/494	32/18670	0.00968349	0.0759829	0.0646066	BLM/RAD51/DNA2/EME1	4	2
BP	GO:1905508	protein localization to microtubule organizing center	4/494	32/18670	0.00968349	0.0759829	0.0646066	CEP72/SPAG5/AURKA/STIL	4	2
BP	GO:0043484	regulation of RNA splicing	9/494	135/18670	0.00980315	0.0767185	0.0652321	RBM17/U2AF2/SF3B4/DAZAP1/FUS/HNRNPL/HNRNPU/RBM38/SRPK1	9	3
BP	GO:0031109	microtubule polymerization or depolymerization	8/494	112/18670	0.00981833	0.0767185	0.0652321	SKA1/KIF2C/TUBG1/KIF18B/SKA3/KIF18A/FBXO5/ZNF207	8	2.82843
BP	GO:0043489	RNA stabilization	5/494	50/18670	0.0101185	0.0787343	0.0669461	HNRNPC/DKC1/E2F1/HNRNPU/RBM38	5	2.23607
BP	GO:1900087	positive regulation of G1/S transition of mitotic cell cycle	5/494	50/18670	0.0101185	0.0787343	0.0669461	CDC6/MTBP/CCNE1/CDC45/CYP1A1	5	1.34164
BP	GO:0046939	nucleotide phosphorylation	9/494	136/18670	0.0102604	0.0796729	0.0677441	FOXK1/NUP37/NUP107/NUP43/SLC2A6/HKDC1/NUP210/RAE1/PRKAG1	9	3
BP	GO:1902275	regulation of chromatin organization	11/494	185/18670	0.0104197	0.0807416	0.0686528	CCNB1/PPHLN1/UBE2N/DNMT1/CDC45/MKI67/TRIM28/ATAD2/SMARCB1/EED/HNRNPU	11	3.31662
BP	GO:0009303	rRNA transcription	4/494	33/18670	0.0107936	0.0834662	0.0709695	SMARCA4/CD3EAP/SMARCB1/NCL	4	2
BP	GO:0001701	in utero embryonic development	18/494	373/18670	0.0108314	0.0835855	0.0710709	CCNB1/GINS1/NEK2/PSPH/ASF1B/CCNB2/TRIM28/XRCC2/GINS4/EIF2S2/STIL/PRMT1/SLC39A1/ACTL6A/E2F8/PLK4/MSH2/TAPT1	18	3.77124
BP	GO:0000731	DNA synthesis involved in DNA repair	5/494	51/18670	0.0109807	0.0843884	0.0717536	RFC4/POLD1/RFC2/DTL/RFC5	5	2.23607
BP	GO:0009994	oocyte differentiation	5/494	51/18670	0.0109807	0.0843884	0.0717536	CCNB1/TRIP13/AURKA/FBXO5/CDC25B	5	2.23607
BP	GO:0016446	somatic hypermutation of immunoglobulin genes	3/494	18/18670	0.011176	0.0855376	0.0727307	EXO1/POLQ/MSH2	3	1.73205
BP	GO:0039692	single stranded viral RNA replication via double stranded DNA intermediate	3/494	18/18670	0.011176	0.0855376	0.0727307	TOP2A/TRIM28/SMARCB1	3	1.73205
BP	GO:0009135	purine nucleoside diphosphate metabolic process	9/494	138/18670	0.0112229	0.0855458	0.0727377	FOXK1/NUP37/NUP107/NUP43/SLC2A6/HKDC1/NUP210/RAE1/PRKAG1	9	3
BP	GO:0009179	purine ribonucleoside diphosphate metabolic process	9/494	138/18670	0.0112229	0.0855458	0.0727377	FOXK1/NUP37/NUP107/NUP43/SLC2A6/HKDC1/NUP210/RAE1/PRKAG1	9	3
BP	GO:0006732	coenzyme metabolic process	19/494	403/18670	0.0113326	0.0862064	0.0732994	PDSS1/FOXK1/NUP37/NUP107/NUP43/MTHFD1L/SLC2A6/HKDC1/NUP210/RAE1/PRKAG1/PDK2/CBR4/GPHN/GCDH/MTHFD1/AASS/DCXR/PDK4	19	0.688247
BP	GO:0006364	rRNA processing	12/494	214/18670	0.0118541	0.0899097	0.0764482	GTPBP4/NOP58/DHX37/DCAF13/PA2G4/NOP2/RPP38/NOP56/DKC1/LYAR/DDX49/DDX27	12	3.4641
BP	GO:0006470	protein dephosphorylation	16/494	321/18670	0.0118877	0.0899097	0.0764482	CDKN3/CDC25A/DLGAP5/CDCA2/CDC25C/PRKCD/TIPRL/CDC25B/PPP5C/MASTL/DUSP12/PGAM5/PPP1CC/RCAN1/CDC14B/CRY2	16	2.5
BP	GO:1902373	negative regulation of mRNA catabolic process	5/494	52/18670	0.0118917	0.0899097	0.0764482	DHX34/HNRNPC/E2F1/HNRNPU/RBM38	5	2.23607
BP	GO:0048002	antigen processing and presentation of peptide antigen	11/494	189/18670	0.0120931	0.091248	0.0775862	KIF2C/CENPE/KIF18A/KIF4A/KIF23/KIF15/DYNC1LI1/KIF11/PSMD14/RACGAP1/DYNLL1	11	3.31662
BP	GO:0018209	peptidyl-serine modification	16/494	322/18670	0.0122156	0.0919865	0.0782141	CCNB1/TTK/PLK1/BAK1/AURKB/CDK1/AURKA/MAPKAPK5/VRK1/PRKCD/CDC7/MASTL/IKBKE/PRKDC/CREBL2/DRD1	16	3
BP	GO:0009185	ribonucleoside diphosphate metabolic process	9/494	140/18670	0.0122514	0.0920703	0.0782854	FOXK1/NUP37/NUP107/NUP43/SLC2A6/HKDC1/NUP210/RAE1/PRKAG1	9	3
BP	GO:0010906	regulation of glucose metabolic process	8/494	117/18670	0.0125755	0.0940543	0.0799723	FOXK1/DUSP12/PDK2/KAT2B/RORA/IRS1/IRS2/PDK4	8	-1.41421
BP	GO:0000377	RNA splicing, via transesterification reactions with bulged adenosine as nucleophile	18/494	379/18670	0.0125909	0.0940543	0.0799723	RBM17/SFPQ/NCBP2/SRRT/U2AF2/HNRNPC/SNRPD1/SF3B4/DAZAP1/SNRPA1/SNRPB/SNRPF/HNRNPM/FUS/HNRNPL/HNRNPU/SNRPA/SRPK1	18	4.24264
BP	GO:0000398	mRNA splicing, via spliceosome	18/494	379/18670	0.0125909	0.0940543	0.0799723	RBM17/SFPQ/NCBP2/SRRT/U2AF2/HNRNPC/SNRPD1/SF3B4/DAZAP1/SNRPA1/SNRPB/SNRPF/HNRNPM/FUS/HNRNPL/HNRNPU/SNRPA/SRPK1	18	4.24264
BP	GO:0032869	cellular response to insulin stimulus	12/494	216/18670	0.0126867	0.0945808	0.08042	PRKCD/NCOA5/PIK3R2/CDK4/PRKDC/PDK2/KAT2B/FOXO4/IRS1/IRS2/SORL1/PDK4	12	-0.57735
BP	GO:0002566	somatic diversification of immune receptors via somatic mutation	3/494	19/18670	0.013015	0.0962591	0.081847	EXO1/POLQ/MSH2	3	1.73205
BP	GO:0006337	nucleosome disassembly	3/494	19/18670	0.013015	0.0962591	0.081847	SMARCD1/SMARCA4/SMARCB1	3	1.73205
BP	GO:0046112	nucleobase biosynthetic process	3/494	19/18670	0.013015	0.0962591	0.081847	MTHFD1L/GMPS/MTHFD1	3	0.57735
BP	GO:0070989	oxidative demethylation	3/494	19/18670	0.013015	0.0962591	0.081847	TDG/CYP1A2/CYP3A4	3	-0.57735
CC	GO:0098687	chromosomal region	75/516	349/19717	6.99708e-47	3.53352e-44	2.75464e-44	SUV39H2/CCNB1/CENPA/TTK/PLK1/DSCC1/MCM4/AURKB/HJURP/CDK1/SKA1/NCAPG/KIF2C/NUF2/BUB1B/EZH2/RECQL4/CENPF/CDCA8/NDC80/SPAG5/MAD2L1/SPC25/SKA3/BUB1/NEK2/CENPE/AURKA/KIF18A/BLM/CENPO/CENPW/OIP5/POLD1/MTBP/ZWINT/CENPL/DNMT1/CDT1/CDCA5/PIF1/DYNC1LI1/RAD51/NUP37/CENPH/CENPM/ERCC6L/RAD21/CENPK/NUP107/SPC24/MCM2/NUP43/RCC2/MCM3/HELLS/CENPI/DNA2/ZNF207/DYNLL1/XRCC3/FEN1/KNTC1/CBX3/MCM6/NCAPD2/BIRC5/INCENP/P…	75	8.19837
CC	GO:0000775	chromosome, centromeric region	58/516	193/19717	3.13163e-45	7.90736e-43	6.16436e-43	SUV39H2/CCNB1/CENPA/TTK/PLK1/DSCC1/AURKB/HJURP/SKA1/NCAPG/KIF2C/NUF2/BUB1B/CENPF/CDCA8/NDC80/SPAG5/MAD2L1/SPC25/SKA3/BUB1/NEK2/CENPE/AURKA/KIF18A/CENPO/CENPW/OIP5/MTBP/ZWINT/CENPL/DNMT1/CDT1/CDCA5/DYNC1LI1/NUP37/CENPH/CENPM/ERCC6L/RAD21/CENPK/NUP107/SPC24/NUP43/RCC2/HELLS/CENPI/ZNF207/DYNLL1/KNTC1/CBX3/NCAPD2/BIRC5/INCENP/PPP1CC/HNRNPU/ESCO2/KAT2B	58	7.35316
CC	GO:0000779	condensed chromosome, centromeric region	41/516	118/19717	4.21698e-35	7.09859e-33	5.53387e-33	CCNB1/CENPA/PLK1/AURKB/HJURP/SKA1/NCAPG/KIF2C/NUF2/BUB1B/CENPF/NDC80/SPAG5/MAD2L1/SPC25/SKA3/BUB1/NEK2/CENPE/AURKA/CENPO/CENPW/ZWINT/CDT1/DYNC1LI1/NUP37/CENPH/CENPM/ERCC6L/CENPK/NUP107/SPC24/NUP43/ZNF207/KNTC1/CBX3/NCAPD2/BIRC5/INCENP/PPP1CC/HNRNPU	41	6.40312
CC	GO:0000776	kinetochore	43/516	135/19717	6.40082e-35	8.08103e-33	6.29975e-33	CCNB1/CENPA/TTK/PLK1/AURKB/HJURP/SKA1/KIF2C/NUF2/BUB1B/CENPF/NDC80/SPAG5/MAD2L1/SPC25/SKA3/BUB1/NEK2/CENPE/KIF18A/CENPO/CENPW/MTBP/ZWINT/CDT1/DYNC1LI1/NUP37/CENPH/CENPM/ERCC6L/CENPK/NUP107/SPC24/NUP43/CENPI/ZNF207/DYNLL1/KNTC1/BIRC5/INCENP/PPP1CC/HNRNPU/KAT2B	43	6.25244
CC	GO:0005819	spindle	63/516	347/19717	8.70128e-35	8.78829e-33	6.85111e-33	CCNB1/KIF20A/WDR62/TTK/PLK1/AURKB/CDC6/CDK1/SKA1/BUB1B/CENPF/CDCA8/TUBG1/TPX2/SPAG5/MAD2L1/CDC20/KIF18B/SKA3/NEK2/CENPE/AURKA/KIF18A/DLGAP5/TMEM201/KIF4A/PRC1/ECT2/KIF23/KIF15/UNC119/TACC3/NUSAP1/KIFC1/VRK1/ASPM/DYNC1LI1/KIF11/KIF14/CKAP2L/FBXO5/CDC25B/RAD21/CDC7/RCC2/RACGAP1/ZNF207/DYNLL1/YEATS2/GPSM2/KNTC1/CBX3/HAUS5/KATNA1/BIRC5/INCENP/HNRNPU/RAE1/KIF20B/SHCBP1/HAUS1/NR3C1/CDC14B	63	7.4333
CC	GO:0000793	condensed chromosome	52/516	223/19717	1.78591e-34	1.50314e-32	1.17181e-32	CCNB1/CENPA/PLK1/AURKB/HJURP/SKA1/NCAPG/KIF2C/NUF2/BUB1B/CENPF/NDC80/TUBG1/SPAG5/MAD2L1/SPC25/SKA3/BUB1/NEK2/CENPE/AURKA/BLM/CENPO/CENPW/ZWINT/NCAPH/CDT1/CDCA5/TOP2A/DYNC1LI1/MKI67/RAD51/NUP37/FANCD2/CENPH/CENPM/ERCC6L/RAD21/CENPK/NUP107/SPC24/NUP43/ZNF207/KNTC1/CBX3/NCAPD2/BIRC5/INCENP/PPP1CC/HNRNPU/SMC4/SUN2	52	6.93375
CC	GO:0000777	condensed chromosome kinetochore	36/516	105/19717	1.05164e-30	7.58682e-29	5.91448e-29	CCNB1/CENPA/PLK1/HJURP/SKA1/KIF2C/NUF2/BUB1B/CENPF/NDC80/SPAG5/MAD2L1/SPC25/SKA3/BUB1/NEK2/CENPE/CENPO/CENPW/ZWINT/CDT1/DYNC1LI1/NUP37/CENPH/CENPM/ERCC6L/CENPK/NUP107/SPC24/NUP43/ZNF207/KNTC1/BIRC5/INCENP/PPP1CC/HNRNPU	36	6
CC	GO:0072686	mitotic spindle	29/516	109/19717	1.96755e-21	1.24201e-19	9.6824e-20	AURKB/CDK1/SKA1/TPX2/SPAG5/MAD2L1/KIF18B/CENPE/AURKA/KIF18A/ECT2/KIF23/TACC3/NUSAP1/KIFC1/ASPM/KIF11/CKAP2L/CDC7/RCC2/RACGAP1/DYNLL1/YEATS2/GPSM2/KATNA1/HNRNPU/RAE1/KIF20B/CDC14B	29	5.01377
CC	GO:0005874	microtubule	51/516	416/19717	2.97949e-20	1.67183e-18	1.30331e-18	CCT6A/CCT5/KIF20A/PLK1/GTSE1/AURKB/CDK1/SKA1/KIF2C/TUBA1C/TUBG1/TPX2/SPAG5/TUBA1B/KIF18B/SKA3/NEK2/CENPE/AURKA/KIF18A/CCT2/KIF4A/PRC1/KIF23/KIF15/CCT3/NUSAP1/KIFC1/ASPM/DYNC1LI1/KIF11/KIF14/CCT8/TCP1/RCC2/DNM1L/RACGAP1/ZNF207/DYNLL1/TTLL4/KNTC1/HAUS5/KATNA1/BIRC5/INCENP/HNRNPU/KIF20B/HAUS1/BCAS3/DCXR/GABARAPL1	51	6.30126
CC	GO:0000922	spindle pole	32/516	164/19717	4.14029e-19	2.09084e-17	1.62997e-17	CCNB1/WDR62/PLK1/AURKB/CDC6/CENPF/TUBG1/TPX2/SPAG5/MAD2L1/CDC20/NEK2/AURKA/DLGAP5/TMEM201/PRC1/UNC119/TACC3/ASPM/DYNC1LI1/KIF11/CKAP2L/CDC25B/RAD21/GPSM2/KNTC1/KATNA1/HNRNPU/RAE1/KIF20B/HAUS1/CDC14B	32	5.3033
CC	GO:0030496	midbody	28/516	173/19717	1.07973e-14	4.95695e-13	3.8643e-13	RAN/KIF20A/PLK1/AURKB/CDK1/CENPF/CDCA8/SPAG5/NEK2/CENPE/AURKA/CEP55/KIF4A/PRC1/ECT2/KIF23/ANLN/ASPM/KIF14/RCC2/RACGAP1/KATNA1/BIRC5/INCENP/PPP1CC/HNRNPU/KIF20B/SHCBP1	28	5.2915
CC	GO:0051233	spindle midzone	14/516	34/19717	5.11418e-14	2.15222e-12	1.67781e-12	PLK1/AURKB/CDC6/CDCA8/KIF18B/CENPE/AURKA/KIF18A/UNC119/KIF14/RCC2/RACGAP1/HNRNPU/KIF20B	14	3.74166
CC	GO:0005876	spindle microtubule	17/516	59/19717	9.816e-14	3.81314e-12	2.97262e-12	PLK1/AURKB/CDK1/SKA1/TUBG1/KIF18B/SKA3/CENPE/AURKA/KIF18A/KIF4A/PRC1/NUSAP1/KIF11/KNTC1/BIRC5/HNRNPU	17	4.12311
CC	GO:0000794	condensed nuclear chromosome	20/516	99/19717	9.95744e-13	3.59179e-11	2.80006e-11	CCNB1/CENPA/PLK1/AURKB/NUF2/BUB1B/NDC80/TUBG1/BUB1/NEK2/AURKA/BLM/CENPO/NCAPH/RAD51/RAD21/CENPK/NCAPD2/INCENP/SUN2	20	4.02492
CC	GO:0005657	replication fork	17/516	70/19717	2.13587e-12	7.19077e-11	5.60573e-11	MCM10/RFC4/BLM/POLD1/DNMT1/UHRF1/PIF1/CDC45/DONSON/XRCC2/RFC2/GINS4/MCM3/XRCC3/PRIM2/RFC5/TIMELESS	17	4.12311
CC	GO:0000780	condensed nuclear chromosome, centromeric region	11/516	26/19717	1.92196e-11	6.06617e-10	4.72902e-10	CCNB1/CENPA/PLK1/AURKB/NUF2/BUB1B/NDC80/BUB1/AURKA/CENPO/CENPK	11	3.31662
CC	GO:0000778	condensed nuclear chromosome kinetochore	9/516	15/19717	2.33883e-11	6.9477e-10	5.41624e-10	CCNB1/CENPA/PLK1/NUF2/BUB1B/NDC80/BUB1/CENPO/CENPK	9	3
CC	GO:0000940	condensed chromosome outer kinetochore	8/516	14/19717	5.45261e-10	1.52976e-08	1.19256e-08	CCNB1/PLK1/SKA1/BUB1B/CENPF/NDC80/SKA3/BUB1	8	2.82843
CC	GO:0005875	microtubule associated complex	20/516	152/19717	3.09809e-09	8.23439e-08	6.41931e-08	KIF20A/AURKB/KIF2C/CDCA8/KIF18B/CENPE/AURKA/KIF18A/KIF4A/KIF23/KIF15/KIFC1/DYNC1LI1/KIF11/KIF14/DYNLL1/HAUS5/BIRC5/KIF20B/HAUS1	20	4.47214
CC	GO:1990023	mitotic spindle midzone	7/516	13/19717	1.20888e-08	3.05243e-07	2.37959e-07	AURKB/KIF18B/CENPE/KIF18A/RCC2/HNRNPU/KIF20B	7	2.64575
CC	GO:0005871	kinesin complex	12/516	55/19717	1.43278e-08	3.44549e-07	2.68601e-07	KIF20A/KIF2C/KIF18B/CENPE/KIF18A/KIF4A/KIF23/KIF15/KIFC1/KIF11/KIF14/KIF20B	12	3.4641
CC	GO:0000781	chromosome, telomeric region	19/516	161/19717	4.64567e-08	1.05954e-06	8.2599e-07	MCM4/CDK1/EZH2/RECQL4/BLM/POLD1/PIF1/RAD51/MCM2/MCM3/DNA2/XRCC3/FEN1/CBX3/MCM6/PPP1CC/MSH2/PRKDC/SUN2	19	3.90007
CC	GO:0101031	chaperone complex	8/516	22/19717	4.82564e-08	1.05954e-06	8.2599e-07	CCT6A/CCT5/STIP1/CCT2/CCT3/CCT8/TCP1/PPP5C	8	2.82843
CC	GO:0005832	chaperonin-containing T-complex	6/516	11/19717	1.28973e-07	2.7138e-06	2.11561e-06	CCT6A/CCT5/CCT2/CCT3/CCT8/TCP1	6	2.44949
CC	GO:0000784	nuclear chromosome, telomeric region	16/516	125/19717	1.73219e-07	3.49902e-06	2.72774e-06	MCM4/CDK1/POLD1/PIF1/RAD51/MCM2/MCM3/DNA2/XRCC3/FEN1/CBX3/MCM6/PPP1CC/MSH2/PRKDC/SUN2	16	3.5
CC	GO:0005720	nuclear heterochromatin	9/516	35/19717	2.06832e-07	4.01731e-06	3.13179e-06	CENPA/BEND3/UHRF1/TRIM28/TCP1/CBX3/EED/EME1/ESCO2	9	3
CC	GO:0000790	nuclear chromatin	29/516	377/19717	2.49402e-07	4.66474e-06	3.63651e-06	CENPA/CPSF6/EZH2/BEND3/CHAF1B/ASF1B/UHRF1/CDCA5/SMARCD1/SMARCA4/RAD51AP1/HDAC2/MCRS1/HNRNPC/RAD51/TRIM28/TCP1/TRNP1/ACTL6A/CBX3/TBP/E2F1/SMARCB1/EED/EME1/ESCO2/TIMELESS/CBX7/ESR1	29	4.64238
CC	GO:0000792	heterochromatin	12/516	78/19717	8.21403e-07	1.48146e-05	1.1549e-05	CENPA/BEND3/DNMT1/UHRF1/TRIM28/TCP1/HELLS/CBX3/INCENP/EED/EME1/ESCO2	12	3.4641
CC	GO:0034399	nuclear periphery	15/516	131/19717	1.77724e-06	3.09485e-05	2.41266e-05	CENPF/KIN/LMNB1/BLM/CENPW/KIF4A/UHRF1/SFPQ/PRKCD/LMNB2/RAD21/NUP107/HNRNPM/HNRNPU/SRPK1	15	3.87298
CC	GO:0097431	mitotic spindle pole	7/516	27/19717	4.54898e-06	7.65744e-05	5.96953e-05	SPAG5/AURKA/ASPM/GPSM2/KATNA1/RAE1/KIF20B	7	2.64575
CC	GO:0016363	nuclear matrix	13/516	109/19717	5.49623e-06	8.95354e-05	6.97994e-05	CENPF/KIN/LMNB1/BLM/CENPW/KIF4A/UHRF1/SFPQ/PRKCD/RAD21/HNRNPM/HNRNPU/SRPK1	13	3.60555
CC	GO:0005721	pericentric heterochromatin	6/516	20/19717	8.8497e-06	0.000139659	0.000108875	CENPA/DNMT1/HELLS/CBX3/INCENP/ESCO2	6	2.44949
CC	GO:0000307	cyclin-dependent protein kinase holoenzyme complex	8/516	42/19717	1.12369e-05	0.000171958	0.000134054	CCNB1/CDK1/CKS2/CCNF/CCNB2/CCNE2/CCNE1/CDK4	8	2.82843
CC	GO:0010369	chromocenter	5/516	14/19717	1.98212e-05	0.000294403	0.000229509	AURKB/CDCA8/OIP5/INCENP/ESCO2	5	2.23607
CC	GO:0045120	pronucleus	5/516	15/19717	2.9093e-05	0.00041977	0.000327241	EZH2/CENPF/AURKA/TBP/EED	5	2.23607
CC	GO:0032155	cell division site part	9/516	63/19717	3.61813e-05	0.000507543	0.000395667	KIF20A/CEP55/ECT2/ANLN/MASTL/RACGAP1/PLK4/PPP1CC/RHOB	9	2.33333
CC	GO:0032153	cell division site	9/516	68/19717	6.71068e-05	0.000915917	0.000714024	KIF20A/CEP55/ECT2/ANLN/MASTL/RACGAP1/PLK4/PPP1CC/RHOB	9	2.33333
CC	GO:0043596	nuclear replication fork	7/516	41/19717	8.38749e-05	0.00111417	0.000868579	MCM10/POLD1/CDC45/GINS4/MCM3/PRIM2/TIMELESS	7	2.64575
CC	GO:0032154	cleavage furrow	8/516	55/19717	8.60451e-05	0.00111417	0.000868579	KIF20A/CEP55/ECT2/MASTL/RACGAP1/PLK4/PPP1CC/RHOB	8	2.12132
CC	GO:0005635	nuclear envelope	27/516	464/19717	0.000101054	0.0012758	0.000994581	GTPBP4/RAN/SEPHS1/CENPF/MAD2L1/LMNB1/GNAZ/TMEM201/NUP37/LMNB2/NUP107/NUP43/CACYBP/TMEM120B/DTL/P2RX4/CBX3/NUP210/CLGN/RAE1/CSE1L/CDK4/KLHDC2/SORL1/SUN2/PNPLA7/RANBP3L	27	3.27165
CC	GO:0044450	microtubule organizing center part	15/516	185/19717	0.000111345	0.00137144	0.00106914	RAN/WDR62/PLK1/CEP72/TUBG1/SPAG5/AURKA/CEP55/CCNF/TOP2A/TCP1/STIL/PLK4/IFT52/CEP78	15	3.87298
CC	GO:0018995	host	9/516	73/19717	0.000117778	0.00138321	0.00107831	RAN/KPNA2/TOP2A/NUP37/NUP107/NUP43/VPS37C/NUP210/RAE1	9	3
CC	GO:0043657	host cell	9/516	73/19717	0.000117778	0.00138321	0.00107831	RAN/KPNA2/TOP2A/NUP37/NUP107/NUP43/VPS37C/NUP210/RAE1	9	3
CC	GO:1902911	protein kinase complex	11/516	109/19717	0.000134831	0.00154749	0.00120638	CCNB1/CDK1/CKS2/CCNF/CCNB2/CCNE2/CCNE1/GTF2H2C/CDK4/PRKAG1/IRS1	11	2.7136
CC	GO:0045171	intercellular bridge	8/516	59/19717	0.000143013	0.00160492	0.00125115	KIF20A/CDCA8/TPX2/CEP55/KIF4A/KIF23/UNC119/CDC7	8	2.82843
CC	GO:0061695	transferase complex, transferring phosphorus-containing groups	18/516	259/19717	0.000173023	0.00176708	0.00137757	CCNB1/CDK1/CKS2/POLD1/CCNF/CCNB2/CCNE2/CCNE1/GTF2H2C/MCM3/DNA2/TBP/PIK3R2/CD3EAP/PRIM2/CDK4/PRKAG1/IRS1	18	3.77124
CC	GO:0005680	anaphase-promoting complex	5/516	21/19717	0.000173102	0.00176708	0.00137757	UBE2C/BUB1B/CDC20/ANAPC7/UBE2S	5	2.23607
CC	GO:0005697	telomerase holoenzyme complex	5/516	21/19717	0.000173102	0.00176708	0.00137757	HNRNPC/SNRPB/DKC1/SMG5/HNRNPU	5	2.23607
CC	GO:0044215	other organism	9/516	77/19717	0.000178457	0.00176708	0.00137757	RAN/KPNA2/TOP2A/NUP37/NUP107/NUP43/VPS37C/NUP210/RAE1	9	3
CC	GO:0044216	other organism cell	9/516	77/19717	0.000178457	0.00176708	0.00137757	RAN/KPNA2/TOP2A/NUP37/NUP107/NUP43/VPS37C/NUP210/RAE1	9	3
CC	GO:0044217	other organism part	9/516	77/19717	0.000178457	0.00176708	0.00137757	RAN/KPNA2/TOP2A/NUP37/NUP107/NUP43/VPS37C/NUP210/RAE1	9	3
CC	GO:0034709	methylosome	4/516	12/19717	0.000194169	0.00181584	0.00141558	SNRPD1/SNRPB/PRMT1/SNRPF	4	2
CC	GO:0042555	MCM complex	4/516	12/19717	0.000194169	0.00181584	0.00141558	MCM4/MCM2/MCM3/MCM6	4	2
CC	GO:0071564	npBAF complex	4/516	12/19717	0.000194169	0.00181584	0.00141558	SMARCD1/SMARCA4/ACTL6A/SMARCB1	4	2
CC	GO:0005814	centriole	12/516	139/19717	0.000298554	0.00274127	0.00213702	RAN/WDR62/PLK1/TUBG1/AURKA/CEP55/CCNF/TOP2A/STIL/PLK4/IFT52/CEP78	12	3.4641
CC	GO:0005881	cytoplasmic microtubule	8/516	69/19717	0.000429271	0.00387111	0.00301781	GTSE1/KIF2C/TUBG1/TUBA1B/KIF18B/KIF18A/BCAS3/DCXR	8	1.41421
CC	GO:1902554	serine/threonine protein kinase complex	9/516	88/19717	0.000490601	0.00434655	0.00338845	CCNB1/CDK1/CKS2/CCNF/CCNB2/CCNE2/CCNE1/GTF2H2C/CDK4	9	3
CC	GO:0005732	small nucleolar ribonucleoprotein complex	5/516	28/19717	0.000718811	0.00625861	0.00487904	NOP58/POP1/NOP56/DKC1/SNRPF	5	2.23607
CC	GO:0005637	nuclear inner membrane	7/516	58/19717	0.000765071	0.00654849	0.00510502	LMNB1/TMEM201/LMNB2/TMEM120B/P2RX4/CBX3/SUN2	7	1.88982
CC	GO:0000152	nuclear ubiquitin ligase complex	6/516	43/19717	0.000835958	0.00703598	0.00548506	UBE2C/BUB1B/CDC20/ANAPC7/UBE2S/CBX7	6	1.63299
CC	GO:0044798	nuclear transcription factor complex	14/516	201/19717	0.00086732	0.00718028	0.00559755	SFPQ/E2F2/E2F3/TRIM28/GTF2H2C/E2F5/HNRNPAB/E2F8/TBP/E2F1/CD3EAP/HNRNPU/NFATC3/MXI1	14	2.67261
CC	GO:0031461	cullin-RING ubiquitin ligase complex	12/516	158/19717	0.000944882	0.00769622	0.00599976	UBE2C/BUB1B/CDC20/ANAPC7/CKS2/CCNF/UBE2S/DCAF13/CACYBP/DTL/FBXO33/FBXO31	12	2.3094
CC	GO:0090575	RNA polymerase II transcription factor complex	12/516	163/19717	0.00123817	0.00992499	0.00773725	SFPQ/E2F2/E2F3/TRIM28/GTF2H2C/E2F5/HNRNPAB/E2F8/TBP/E2F1/HNRNPU/MXI1	12	2.88675
CC	GO:0016514	SWI/SNF complex	4/516	19/19717	0.00131443	0.0103717	0.0080855	SMARCD1/SMARCA4/ACTL6A/SMARCB1	4	2
CC	GO:0031307	integral component of mitochondrial outer membrane	4/516	20/19717	0.00160935	0.0125034	0.00974731	BAK1/TOMM40/FUNDC1/GDAP1	4	2
CC	GO:0031080	nuclear pore outer ring	3/516	10/19717	0.00186407	0.0140501	0.0109531	NUP37/NUP107/NUP43	3	1.73205
CC	GO:0070938	contractile ring	3/516	10/19717	0.00186407	0.0140501	0.0109531	PRC1/ANLN/KIF20B	3	1.73205
CC	GO:0031306	intrinsic component of mitochondrial outer membrane	4/516	21/19717	0.00194729	0.0144615	0.0112738	BAK1/TOMM40/FUNDC1/GDAP1	4	2
CC	GO:0005643	nuclear pore	8/516	89/19717	0.00230298	0.0168551	0.0131398	RAN/MAD2L1/NUP37/NUP107/NUP43/NUP210/RAE1/RANBP3L	8	2.12132
CC	GO:0072687	meiotic spindle	3/516	11/19717	0.00251353	0.0181333	0.0141362	AURKA/ASPM/FBXO5	3	1.73205
CC	GO:0005741	mitochondrial outer membrane	12/516	178/19717	0.00259993	0.0184925	0.0144162	BAK1/VDAC1/TOMM40/MSTO1/FUNDC1/DNM1L/GDAP1/MYO19/MTX2/PGAM5/WASF1/PPP1CC	12	3.4641
CC	GO:0034708	methyltransferase complex	9/516	113/19717	0.00289119	0.0202785	0.0158086	EZH2/HDAC2/MCRS1/SNRPD1/SNRPB/PRMT1/SNRPF/WDR4/EED	9	3
CC	GO:0000791	euchromatin	5/516	38/19717	0.00296217	0.0204917	0.0159748	UHRF1/TRIM28/TRNP1/CBX3/TBP	5	2.23607
CC	GO:0005759	mitochondrial matrix	23/516	469/19717	0.00312378	0.0213177	0.0166187	PDSS1/CCNB1/CDK1/C12orf65/VDAC1/RAD51/PUS1/TIMM44/MRPL42/MTHFD1L/DNA2/MRPL9/NR3C1/PDK2/CBR4/HIBADH/GCDH/IVD/ALDH2/NUBPL/AASS/TK2/PDK4	23	0.208514
CC	GO:0005681	spliceosomal complex	12/516	185/19717	0.00356054	0.0239743	0.0186897	RBM17/U2AF2/HNRNPC/SNRPD1/SF3B4/SNRPA1/SNRPB/SNRPF/HNRNPM/TTF2/HNRNPU/SNRPA	12	3.4641
CC	GO:0000800	lateral element	3/516	13/19717	0.00419024	0.0274814	0.0214238	BLM/RAD51/INCENP	3	1.73205
CC	GO:0005687	U4 snRNP	3/516	13/19717	0.00419024	0.0274814	0.0214238	SNRPD1/SNRPB/SNRPF	3	1.73205
CC	GO:0030894	replisome	4/516	26/19717	0.00438716	0.0284041	0.022143	POLD1/DONSON/MCM3/PRIM2	4	2
CC	GO:1904949	ATPase complex	8/516	101/19717	0.00502695	0.031848	0.0248278	RFC4/SMARCD1/SMARCA4/HDAC2/MCRS1/ATP1A1/ACTL6A/SMARCB1	8	2.82843
CC	GO:0005689	U12-type spliceosomal complex	4/516	27/19717	0.00504522	0.031848	0.0248278	SNRPD1/SF3B4/SNRPB/SNRPF	4	2
CC	GO:0090543	Flemming body	4/516	28/19717	0.00576629	0.0359504	0.0280259	CEP55/KIF23/KIF14/RACGAP1	4	2
CC	GO:0005639	integral component of nuclear inner membrane	3/516	15/19717	0.00641215	0.0380957	0.0296984	TMEM201/P2RX4/SUN2	3	0.57735
CC	GO:0031229	intrinsic component of nuclear inner membrane	3/516	15/19717	0.00641215	0.0380957	0.0296984	TMEM201/P2RX4/SUN2	3	0.57735
CC	GO:0031616	spindle pole centrosome	3/516	15/19717	0.00641215	0.0380957	0.0296984	AURKB/AURKA/DLGAP5	3	1.73205
CC	GO:0071565	nBAF complex	3/516	15/19717	0.00641215	0.0380957	0.0296984	SMARCD1/SMARCA4/SMARCB1	3	1.73205
CC	GO:1990752	microtubule end	4/516	29/19717	0.00655289	0.0384792	0.0299973	KIF2C/SPAG5/KIF18B/ASPM	4	2
CC	GO:0031968	organelle outer membrane	12/516	201/19717	0.00684169	0.0397133	0.0309594	BAK1/VDAC1/TOMM40/MSTO1/FUNDC1/DNM1L/GDAP1/MYO19/MTX2/PGAM5/WASF1/PPP1CC	12	3.4641
CC	GO:0019867	outer membrane	12/516	203/19717	0.00738038	0.0411072	0.032046	BAK1/VDAC1/TOMM40/MSTO1/FUNDC1/DNM1L/GDAP1/MYO19/MTX2/PGAM5/WASF1/PPP1CC	12	3.4641
CC	GO:0000803	sex chromosome	4/516	30/19717	0.00740743	0.0411072	0.032046	PLK4/EED/HNRNPU/ESCO2	4	2
CC	GO:0005719	nuclear euchromatin	4/516	30/19717	0.00740743	0.0411072	0.032046	TRIM28/TRNP1/CBX3/TBP	4	2
CC	GO:0071007	U2-type catalytic step 2 spliceosome	4/516	30/19717	0.00740743	0.0411072	0.032046	SNRPD1/SNRPA1/SNRPB/SNRPF	4	2
CC	GO:0000151	ubiquitin ligase complex	15/516	282/19717	0.00766464	0.0414105	0.0322825	UBE2C/BUB1B/MED10/CDC20/ANAPC7/CKS2/UBE2N/CCNF/UBE2S/DCAF13/CACYBP/DTL/FBXO33/FBXO31/CBX7	15	2.32379
CC	GO:0035098	ESC/E(Z) complex	3/516	16/19717	0.00774029	0.0414105	0.0322825	EZH2/HDAC2/EED	3	1.73205
CC	GO:0044453	nuclear membrane part	3/516	16/19717	0.00774029	0.0414105	0.0322825	TMEM201/P2RX4/SUN2	3	0.57735
CC	GO:0071013	catalytic step 2 spliceosome	7/516	87/19717	0.00779009	0.0414105	0.0322825	HNRNPC/SNRPD1/SNRPA1/SNRPB/SNRPF/HNRNPM/HNRNPU	7	2.64575
CC	GO:0001650	fibrillar center	9/516	132/19717	0.00797465	0.04195	0.032703	NOP58/UBE2N/E2F5/RPP38/NOP56/DKC1/CD3EAP/SMARCB1/RAE1	9	3
CC	GO:0032839	dendrite cytoplasm	4/516	32/19717	0.00932948	0.048571	0.0378646	SFPQ/WASF1/HNRNPU/GABARAPL1	4	1
CC	GO:0071005	U2-type precatalytic spliceosome	5/516	50/19717	0.00968453	0.049905	0.0389046	SNRPD1/SF3B4/SNRPA1/SNRPB/SNRPF	5	2.23607
CC	GO:0071011	precatalytic spliceosome	5/516	51/19717	0.0105121	0.0536223	0.0418024	SNRPD1/SF3B4/SNRPA1/SNRPB/SNRPF	5	2.23607
CC	GO:0034719	SMN-Sm protein complex	3/516	18/19717	0.0108505	0.054795	0.0427167	SNRPD1/SNRPB/SNRPF	3	1.73205
CC	GO:0031965	nuclear membrane	15/516	296/19717	0.0116243	0.0581217	0.0453101	GTPBP4/SEPHS1/LMNB1/TMEM201/LMNB2/NUP107/TMEM120B/DTL/P2RX4/CBX3/NUP210/CDK4/KLHDC2/SUN2/PNPLA7	15	2.32379
CC	GO:0031362	anchored component of external side of plasma membrane	3/516	19/19717	0.0126385	0.0625729	0.0487802	CD24/GPIHBP1/CA4	3	-0.57735
CC	GO:0070603	SWI/SNF superfamily-type complex	6/516	76/19717	0.0145811	0.0708205	0.0552097	SMARCD1/SMARCA4/HDAC2/MCRS1/ACTL6A/SMARCB1	6	2.44949
CC	GO:0035371	microtubule plus-end	3/516	20/19717	0.0145848	0.0708205	0.0552097	KIF2C/SPAG5/KIF18B	3	1.73205
CC	GO:0005685	U1 snRNP	4/516	37/19717	0.0154715	0.0744106	0.0580085	SNRPD1/SNRPB/SNRPF/SNRPA	4	2
CC	GO:0005667	transcription factor complex	17/516	365/19717	0.0162757	0.0775398	0.0604479	SFPQ/E2F2/E2F3/TRIM28/SUB1/GTF2H2C/E2F5/HNRNPAB/E2F8/TBP/E2F1/CD3EAP/HNRNPU/CDK4/PRKDC/NFATC3/MXI1	17	3.15296
CC	GO:0032993	protein-DNA complex	11/516	202/19717	0.0176707	0.0833993	0.0650158	CENPA/GINS1/POLD1/CDC45/DONSON/GINS4/MCM3/TBP/PRIM2/PRKDC/ESR1	11	2.7136
CC	GO:0044452	nucleolar part	10/516	178/19717	0.0190271	0.0889691	0.0693579	NOP58/POP1/UBE2N/E2F5/RPP38/NOP56/DKC1/CD3EAP/SMARCB1/RAE1	10	3.16228
CC	GO:0000795	synaptonemal complex	4/516	40/19717	0.0201415	0.092468	0.0720855	PLK1/BLM/RAD51/INCENP	4	2
CC	GO:0099086	synaptonemal structure	4/516	40/19717	0.0201415	0.092468	0.0720855	PLK1/BLM/RAD51/INCENP	4	2
CC	GO:0046930	pore complex	3/516	23/19717	0.0213875	0.0973035	0.0758552	BAK1/VDAC1/TOMM40	3	1.73205
MF	GO:0016887	ATPase activity	45/501	384/17697	5.40728e-16	3.55799e-13	3.13053e-13	HSPA14/KIF20A/OLA1/DSCC1/KIF2C/RFC4/KIF18B/CENPE/KIF18A/BLM/KIF4A/KIF23/KIF15/SMARCA4/KIFC1/TOP2A/PIF1/POLQ/RAD54B/KIF11/KIF14/RAD51/ERCC6L/CCT8/XRCC2/RFC2/MCM2/ATP1A1/DNA2/DYNLL1/XRCC3/MCM6/MYO19/TTF2/ATAD2/KATNA1/ATP13A1/KIF20B/MSH2/RFC5/YME1L1/RAD54L/MYO1B/ABCC9/ABCG2	45	5.81378
MF	GO:0008094	DNA-dependent ATPase activity	20/501	69/17697	2.40433e-15	7.91024e-13	6.9599e-13	DSCC1/RFC4/BLM/SMARCA4/TOP2A/PIF1/POLQ/RAD54B/RAD51/ERCC6L/XRCC2/RFC2/MCM2/DNA2/XRCC3/MCM6/TTF2/MSH2/RFC5/RAD54L	20	4.47214
MF	GO:0140097	catalytic activity, acting on DNA	32/501	213/17697	1.00502e-14	2.20435e-12	1.93951e-12	DSCC1/MCM4/GINS1/EXO1/RECQL4/RFC4/BLM/POLD1/DNMT1/NEIL3/TOP2A/PIF1/TDG/POLQ/RAD54B/CDC45/RAD51/ERCC6L/RFC2/MCM2/GINS4/MCM3/DNA2/LIG1/DKC1/XRCC3/FEN1/MCM6/EME1/RFC5/RAD54L/DNASE1L3	32	5.3033
MF	GO:0004386	helicase activity	28/501	163/17697	1.51453e-14	2.4914e-12	2.19209e-12	DSCC1/MCM4/GINS1/RECQL4/RFC4/BLM/SMARCA4/DHX34/PIF1/DHX37/POLQ/RAD54B/CDC45/DDX55/RAD51/ERCC6L/RFC2/MCM2/GINS4/MCM3/HELLS/DNA2/MCM6/DDX49/TTF2/DDX27/RFC5/RAD54L	28	5.2915
MF	GO:0042623	ATPase activity, coupled	35/501	284/17697	2.43078e-13	3.19891e-11	2.81459e-11	HSPA14/DSCC1/RFC4/KIF18B/KIF18A/BLM/SMARCA4/TOP2A/PIF1/POLQ/RAD54B/KIF11/KIF14/RAD51/ERCC6L/CCT8/XRCC2/RFC2/MCM2/ATP1A1/DNA2/DYNLL1/XRCC3/MCM6/TTF2/KATNA1/ATP13A1/KIF20B/MSH2/RFC5/YME1L1/RAD54L/MYO1B/ABCC9/ABCG2	35	4.90189
MF	GO:0003678	DNA helicase activity	19/501	81/17697	8.2199e-13	9.01449e-11	7.93149e-11	DSCC1/MCM4/GINS1/RECQL4/RFC4/BLM/PIF1/POLQ/RAD54B/CDC45/RAD51/ERCC6L/RFC2/MCM2/GINS4/MCM3/DNA2/MCM6/RFC5	19	4.3589
MF	GO:0017116	single-stranded DNA-dependent ATP-dependent DNA helicase activity	10/501	20/17697	4.33413e-11	3.56482e-09	3.13654e-09	DSCC1/RFC4/PIF1/POLQ/RAD51/RFC2/MCM2/DNA2/MCM6/RFC5	10	3.16228
MF	GO:0043142	single-stranded DNA-dependent ATPase activity	10/501	20/17697	4.33413e-11	3.56482e-09	3.13654e-09	DSCC1/RFC4/PIF1/POLQ/RAD51/RFC2/MCM2/DNA2/MCM6/RFC5	10	3.16228
MF	GO:0004003	ATP-dependent DNA helicase activity	10/501	21/17697	8.06578e-11	4.8248e-09	4.24515e-09	DSCC1/RFC4/PIF1/POLQ/RAD51/RFC2/MCM2/DNA2/MCM6/RFC5	10	3.16228
MF	GO:0008026	ATP-dependent helicase activity	10/501	21/17697	8.06578e-11	4.8248e-09	4.24515e-09	DSCC1/RFC4/PIF1/POLQ/RAD51/RFC2/MCM2/DNA2/MCM6/RFC5	10	3.16228
MF	GO:0070035	purine NTP-dependent helicase activity	10/501	21/17697	8.06578e-11	4.8248e-09	4.24515e-09	DSCC1/RFC4/PIF1/POLQ/RAD51/RFC2/MCM2/DNA2/MCM6/RFC5	10	3.16228
MF	GO:0015631	tubulin binding	31/501	336/17697	8.31742e-09	4.27538e-07	3.76174e-07	CCT5/KIF20A/PLK1/SKA1/KIF2C/SPAG5/KIF18B/CENPE/KIF18A/KIF4A/PRC1/KIF23/KIF15/NUSAP1/KIFC1/KIF11/KIF14/PPP5C/RCC2/CACYBP/DNM1L/RACGAP1/ZNF207/TTLL4/KATNA1/BIRC5/RAE1/KIF20B/BCAS3/SUN2/GABARAPL1	31	4.49013
MF	GO:0008017	microtubule binding	26/501	246/17697	8.44681e-09	4.27538e-07	3.76174e-07	KIF20A/PLK1/SKA1/KIF2C/SPAG5/KIF18B/CENPE/KIF18A/KIF4A/PRC1/KIF23/KIF15/NUSAP1/KIFC1/KIF11/KIF14/PPP5C/RCC2/DNM1L/RACGAP1/ZNF207/KATNA1/BIRC5/RAE1/KIF20B/SUN2	26	4.70679
MF	GO:0003777	microtubule motor activity	14/501	84/17697	9.15641e-08	4.30351e-06	3.78649e-06	KIF20A/KIF2C/KIF18B/CENPE/KIF18A/KIF4A/KIF23/KIF15/KIFC1/DYNC1LI1/KIF11/KIF14/DYNLL1/KIF20B	14	3.74166
MF	GO:0003697	single-stranded DNA binding	15/501	113/17697	6.91337e-07	3.03266e-05	2.66832e-05	MCM10/MCM4/BLM/NEIL3/RAD51AP1/CDC45/RAD51/SUB1/MCM2/MCM3/MCM6/HNRNPU/SMC4/MSH2/CRY2	15	3.35659
MF	GO:0043138	3'-5' DNA helicase activity	7/501	20/17697	7.86766e-07	3.23557e-05	2.84685e-05	GINS1/RECQL4/BLM/CDC45/MCM2/GINS4/MCM6	7	2.64575
MF	GO:0003774	motor activity	16/501	136/17697	1.53883e-06	5.9562e-05	5.24061e-05	KIF20A/KIF2C/KIF18B/CENPE/KIF18A/KIF4A/KIF23/KIF15/KIFC1/DYNC1LI1/KIF11/KIF14/DYNLL1/MYO19/KIF20B/MYO1B	16	3.5
MF	GO:0003688	DNA replication origin binding	7/501	24/17697	3.1834e-06	0.000116371	0.00010239	MCM10/MCM4/CDC6/CDC45/MCM2/MCM3/MCM6	7	2.64575
MF	GO:0003684	damaged DNA binding	10/501	65/17697	1.33833e-05	0.000463486	0.000407802	RECQL4/BLM/POLD1/NEIL3/TDG/POLQ/FEN1/FANCG/MSH2/CRY2	10	2.52982
MF	GO:0000217	DNA secondary structure binding	6/501	24/17697	4.35499e-05	0.00143279	0.00126065	RECQL4/BLM/NEIL3/XRCC2/XRCC3/MSH2	6	2.44949
MF	GO:0016538	cyclin-dependent protein serine/threonine kinase regulator activity	8/501	49/17697	6.33659e-05	0.00198547	0.00174693	CCNB1/CKS2/CCNF/CCNB2/CCNE2/CCNE1/CDK4/KAT2B	8	2.12132
MF	GO:0008574	ATP-dependent microtubule motor activity, plus-end-directed	6/501	26/17697	7.09942e-05	0.00212337	0.00186827	KIF18B/KIF18A/KIF11/KIF14/DYNLL1/KIF20B	6	2.44949
MF	GO:0035173	histone kinase activity	5/501	17/17697	8.3183e-05	0.00237976	0.00209385	CCNB1/AURKB/CDK1/AURKA/VRK1	5	2.23607
MF	GO:0070182	DNA polymerase binding	5/501	19/17697	0.000149151	0.00408922	0.00359794	CDT1/SMARCA4/RAD51/FANCD2/FANCI	5	2.23607
MF	GO:0016893	endonuclease activity, active with either ribo- or deoxyribonucleic acids and producing 5'-phosphomonoesters	7/501	46/17697	0.000287301	0.00706854	0.00621932	EXO1/POP1/RNASEH2A/RPP38/DNA2/FEN1/DNASE1L3	7	1.88982
MF	GO:0008187	poly-pyrimidine tract binding	6/501	33/17697	0.000288719	0.00706854	0.00621932	MCRS1/U2AF2/HNRNPC/DAZAP1/MSI1/HNRNPU	6	2.44949
MF	GO:0008022	protein C-terminus binding	15/501	187/17697	0.000290047	0.00706854	0.00621932	STIP1/CENPF/SAE1/MAD2L1/CDC20/TOP2A/MKI67/RAD51/DYNLL1/GPSM2/IFT52/PPP1CC/NCL/MSH2/SH3GL3	15	3.35659
MF	GO:0070034	telomerase RNA binding	5/501	22/17697	0.000314881	0.0073997	0.00651069	HNRNPC/SNRPB/DKC1/SMG5/HNRNPU	5	2.23607
MF	GO:0031491	nucleosome binding	9/501	85/17697	0.000664156	0.0150695	0.013259	CENPA/UHRF1/SMARCA4/HDAC2/VRK1/HNRNPC/ACTL6A/SMARCB1/EED	9	3
MF	GO:0000400	four-way junction DNA binding	4/501	16/17697	0.000880883	0.0186975	0.0164511	BLM/XRCC2/XRCC3/MSH2	4	2
MF	GO:0016888	endodeoxyribonuclease activity, producing 5'-phosphomonoesters	4/501	16/17697	0.000880883	0.0186975	0.0164511	EXO1/DNA2/FEN1/DNASE1L3	4	1
MF	GO:0004520	endodeoxyribonuclease activity	6/501	41/17697	0.000968123	0.019907	0.0175154	EXO1/DNA2/XRCC3/FEN1/EME1/DNASE1L3	6	1.63299
MF	GO:0051082	unfolded protein binding	11/501	131/17697	0.00125411	0.0250062	0.0220019	HSPA14/CCT6A/CCT5/CCT2/CHAF1B/CCT3/CCT8/TCP1/CLGN/PFDN4/PDRG1	11	3.31662
MF	GO:0044389	ubiquitin-like protein ligase binding	19/501	308/17697	0.00130187	0.0251016	0.0220859	CCNB1/UBE2C/TUBA1B/RNF34/AURKA/CCT2/UBE2N/UBE2T/TRIM28/TCP1/YWHAZ/PA2G4/CACYBP/DNM1L/PRR7/SMG5/IKBKE/FZD4/GABARAPL1	19	3.44124
MF	GO:0004536	deoxyribonuclease activity	7/501	59/17697	0.00133519	0.0251016	0.0220859	EXO1/POLD1/DNA2/XRCC3/FEN1/EME1/DNASE1L3	7	1.88982
MF	GO:1990939	ATP-dependent microtubule motor activity	6/501	44/17697	0.00141505	0.0258639	0.0227566	KIF18B/KIF18A/KIF11/KIF14/DYNLL1/KIF20B	6	2.44949
MF	GO:0031072	heat shock protein binding	10/501	119/17697	0.00204749	0.0364122	0.0320376	HSPA14/STIP1/BAK1/CDK1/HDAC2/DNAJC9/PPP5C/CHORDC1/NR3C1/CYP1A1	10	1.89737
MF	GO:0001091	RNA polymerase II basal transcription factor binding	4/501	20/17697	0.00214371	0.03712	0.0326603	NOP58/TBP/HNRNPU/ESR1	4	1
MF	GO:1990841	promoter-specific chromatin binding	6/501	48/17697	0.00223674	0.0374389	0.032941	EZH2/DNMT1/HDAC2/TRIM28/HNRNPU/FOXO4	6	1.63299
MF	GO:0030957	Tat protein binding	3/501	10/17697	0.00233282	0.0374389	0.032941	SMARCA4/SMARCB1/GABARAPL1	3	0.57735
MF	GO:0032356	oxidized DNA binding	3/501	10/17697	0.00233282	0.0374389	0.032941	RECQL4/BLM/MSH2	3	1.73205
MF	GO:0016891	endoribonuclease activity, producing 5'-phosphomonoesters	5/501	34/17697	0.00251631	0.0394221	0.0346859	EXO1/POP1/RNASEH2A/RPP38/FEN1	5	2.23607
MF	GO:0004523	RNA-DNA hybrid ribonuclease activity	3/501	11/17697	0.00314059	0.0480583	0.0422845	EXO1/RNASEH2A/FEN1	3	1.73205
MF	GO:0004674	protein serine/threonine kinase activity	23/501	439/17697	0.00358852	0.0535729	0.0471366	TTK/PLK1/AURKB/CDK1/BUB1B/BUB1/NEK2/AURKA/MELK/MAPKAPK5/VRK1/PBK/PRKCD/CDK16/CDC7/PKMYT1/MASTL/IKBKE/PLK4/SRPK1/CDK4/PRKAG1/PRKDC	23	4.79583
MF	GO:0044183	protein binding involved in protein folding	4/501	23/17697	0.0036638	0.0535729	0.0471366	HSPA14/CCT2/PDCL3/CLGN	4	2
MF	GO:0043531	ADP binding	5/501	38/17697	0.00413787	0.0591896	0.0520785	PPP5C/ATP1A1/CHORDC1/MSH2/PRKAG1	5	2.23607
MF	GO:0031492	nucleosomal DNA binding	6/501	55/17697	0.00447621	0.0626669	0.0551381	CENPA/SMARCA4/HDAC2/HNRNPC/ACTL6A/SMARCB1	6	2.44949
MF	GO:0048027	mRNA 5'-UTR binding	4/501	25/17697	0.0050057	0.0682152	0.0600198	CCT5/GNL3/IGF2BP2/NCL	4	2
MF	GO:0016725	oxidoreductase activity, acting on CH or CH2 groups	3/501	13/17697	0.00521901	0.0682152	0.0600198	RRM2/CYP1A2/CYP3A4	3	-0.57735
MF	GO:0097617	annealing activity	3/501	13/17697	0.00521901	0.0682152	0.0600198	RECQL4/BLM/RAD54L	3	1.73205
MF	GO:0019887	protein kinase regulator activity	12/501	180/17697	0.0052872	0.0682152	0.0600198	CCNB1/DBF4/CKS2/CCNF/CCNB2/CD24/CCNE2/CCNE1/ABI1/CDK4/PRKAG1/KAT2B	12	2.88675
MF	GO:0051879	Hsp90 protein binding	5/501	41/17697	0.00576463	0.0729448	0.0641811	STIP1/PPP5C/CHORDC1/NR3C1/CYP1A1	5	0.447214
MF	GO:0019207	kinase regulator activity	13/501	207/17697	0.00621117	0.0771122	0.0678479	CCNB1/DBF4/CKS2/CCNF/CCNB2/CD24/CCNE2/CCNE1/PIK3R2/ABI1/CDK4/PRKAG1/KAT2B	13	3.05085
KEGG	hsa04110	Cell cycle	35/247	124/8076	7.30719e-25	1.89256e-22	1.69219e-22	CCNB1/TTK/PLK1/MCM4/CDC6/CDK1/BUB1B/MAD2L1/CDC20/DBF4/BUB1/ANAPC7/CDC25A/CDC25C/PTTG1/CCNB2/CCNE2/HDAC2/E2F2/CCNE1/CDC45/E2F3/YWHAZ/CDC25B/RAD21/E2F5/MCM2/CDC7/PKMYT1/MCM3/E2F1/MCM6/CDK4/PRKDC/CDC14B	35	5.57802
KEGG	hsa03030	DNA replication	13/247	36/8076	1.84996e-11	2.3957e-09	2.14206e-09	MCM4/RFC4/POLD1/RFC2/RNASEH2A/MCM2/MCM3/DNA2/LIG1/FEN1/MCM6/PRIM2/RFC5	13	3.60555
KEGG	hsa04114	Oocyte meiosis	19/247	129/8076	1.07435e-08	9.27521e-07	8.29322e-07	CCNB1/PLK1/CDK1/MAD2L1/CDC20/BUB1/ANAPC7/AURKA/CDC25C/PTTG1/CCNB2/CCNE2/CCNE1/FBXO5/YWHAZ/PKMYT1/FBXO43/PPP1CC/CPEB3	19	3.90007
KEGG	hsa04218	Cellular senescence	18/247	156/8076	1.14726e-06	7.42853e-05	6.64206e-05	CCNB1/MYBL2/CDK1/FOXM1/VDAC1/CDC25A/CCNB2/CCNE2/E2F2/CCNE1/E2F3/E2F5/LIN9/E2F1/PIK3R2/PPP1CC/CDK4/NFATC3	18	3.77124
KEGG	hsa04914	Progesterone-mediated oocyte maturation	14/247	100/8076	1.83575e-06	9.50916e-05	8.5024e-05	CCNB1/PLK1/CDK1/MAD2L1/BUB1/ANAPC7/AURKA/CDC25A/CDC25C/CCNB2/CDC25B/PKMYT1/PIK3R2/CPEB3	14	3.20713
KEGG	hsa03430	Mismatch repair	7/247	23/8076	3.70715e-06	0.000160025	0.000143083	EXO1/RFC4/POLD1/RFC2/LIG1/MSH2/RFC5	7	2.64575
KEGG	hsa03440	Homologous recombination	8/247	41/8076	2.72317e-05	0.00100757	0.0009009	BLM/POLD1/RAD54B/RAD51/XRCC2/XRCC3/EME1/RAD54L	8	2.82843
KEGG	hsa05166	Human T-cell leukemia virus 1 infection	19/247	219/8076	3.84101e-05	0.00124353	0.00111187	RAN/BUB1B/MAD2L1/CDC20/VDAC1/ANAPC7/PTTG1/CCNB2/CCNE2/E2F2/CCNE1/E2F3/TBP/E2F1/PIK3R2/CDK4/NFATC3/STAT5B/KAT2B	19	2.9824
KEGG	hsa03040	Spliceosome	14/247	151/8076	0.000204514	0.00544846	0.00487161	RBM17/NCBP2/U2AF2/HNRNPC/SNRPD1/SF3B4/SNRPA1/SNRPB/TCERG1/SNRPF/HNRNPM/FUS/HNRNPU/SNRPA	14	3.74166
KEGG	hsa03460	Fanconi anemia pathway	8/247	54/8076	0.000210365	0.00544846	0.00487161	BLM/UBE2T/RAD51/FANCD2/FANCI/FANCB/FANCG/EME1	8	2.82843
KEGG	hsa04115	p53 signaling pathway	9/247	73/8076	0.000355723	0.00837566	0.00748891	CCNB1/GTSE1/CDK1/CCNB2/CCNE2/CCNE1/RRM2/CDK4/FAS	9	2.33333
KEGG	hsa05222	Small cell lung cancer	9/247	92/8076	0.00192459	0.0404315	0.0361509	BAK1/CKS2/CCNE2/E2F2/CCNE1/E2F3/E2F1/PIK3R2/CDK4	9	3
KEGG	hsa05220	Chronic myeloid leukemia	8/247	76/8076	0.00213937	0.0404315	0.0361509	BAK1/HDAC2/E2F2/E2F3/E2F1/PIK3R2/CDK4/STAT5B	8	2.12132
KEGG	hsa04068	FoxO signaling pathway	11/247	131/8076	0.00218549	0.0404315	0.0361509	CCNB1/PLK1/CCNB2/PRMT1/PIK3R2/PLK4/PRKAG1/FOXO4/IRS1/IRS2/GABARAPL1	11	0.904534
KEGG	hsa03420	Nucleotide excision repair	6/247	47/8076	0.00289005	0.0489757	0.0437905	RFC4/POLD1/RFC2/GTF2H2C/LIG1/RFC5	6	2.44949
KEGG	hsa03410	Base excision repair	5/247	33/8076	0.00302552	0.0489757	0.0437905	POLD1/NEIL3/TDG/LIG1/FEN1	5	2.23607
KEGG	hsa05203	Viral carcinogenesis	14/247	204/8076	0.0038706	0.0572278	0.051169	BAK1/CDK1/CDC20/CCNE2/HDAC2/CCNE1/YWHAZ/GTF2H2C/TBP/PIK3R2/SCRIB/CDK4/STAT5B/KAT2B	14	2.67261
KEGG	hsa05161	Hepatitis B	12/247	162/8076	0.00397722	0.0572278	0.051169	CCNE2/E2F2/CCNE1/E2F3/YWHAZ/E2F1/PIK3R2/IKBKE/BIRC5/NFATC3/STAT5B/FAS	12	1.73205
KEGG	hsa05223	Non-small cell lung cancer	7/247	72/8076	0.00623718	0.0850226	0.076021	BAK1/E2F2/E2F3/E2F1/PIK3R2/CDK4/STAT5B	7	1.88982
KEGG	hsa05206	MicroRNAs in cancer	18/247	310/8076	0.00667342	0.0864208	0.0772712	BAK1/EZH2/CDC25A/KIF23/DNMT1/CDC25C/CDCA5/CCNE2/HDAC2/E2F2/CCNE1/E2F3/CDC25B/E2F1/PIK3R2/TIMP3/IRS1/IRS2	18	2.82843
KEGG	hsa04923	Regulation of lipolysis in adipocytes	6/247	57/8076	0.00758222	0.0935141	0.0836135	PIK3R2/FABP4/ADRB1/ADRB2/IRS1/IRS2	6	-1.63299
KEGG	hsa05212	Pancreatic cancer	7/247	76/8076	0.00835308	0.0983385	0.0879271	BAK1/E2F2/E2F3/RAD51/E2F1/PIK3R2/CDK4	7	2.64575
